# Supplementary material
Source: publisher figshare collection journal article supplement (https://gsapubs.figshare.com/articles/dataset/_/21520953)
Supplement: Supplementary file 1 [file 1]

## Sheet: Line1
Longitude	Latitude	Mag Anomaly (nT)
164.016	-62.8717	74.8
164.016	-62.8717	74.1
164.015	-62.8714	70.2
164.015	-62.8711	63.7
164.014	-62.8708	58.1
164.014	-62.8707	58.3
164.014	-62.8705	53.7
164.014	-62.8705	53.1
164.013	-62.8702	47.8
164.012	-62.8699	42.5
164.012	-62.8699	42
164.012	-62.8697	37.8
164.012	-62.8696	37.2
164.012	-62.8696	36.8
164.011	-62.8693	32.2
164.011	-62.869	25.7
164.011	-62.869	24.5
164.01	-62.8687	21.3
164.01	-62.8687	20.6
164.01	-62.8686	19.6
164.01	-62.8684	16.6
164.01	-62.8684	15.1
164.009	-62.868	8.6
164.009	-62.868	8.1
164.008	-62.8678	5.3
164.008	-62.8677	4.4
164.008	-62.8677	3.6
164.008	-62.8675	-1
164.008	-62.8674	-2
164.007	-62.8672	-4.9
164.007	-62.8671	-7.1
164.007	-62.8668	-11.3
164.007	-62.8668	-11.8
164.007	-62.8667	-12.5
164.006	-62.8665	-17.1
164.006	-62.8665	-17.4
164.005	-62.8662	-22.8
164.005	-62.8659	-27.2
164.005	-62.8659	-28.4
164.005	-62.8657	-32
164.004	-62.8656	-33
164.004	-62.8656	-33.7
164.004	-62.8653	-38.4
164.003	-62.865	-43.5
164.003	-62.865	-44
164.003	-62.8647	-47.9
164.003	-62.8647	-48.6
164.002	-62.8645	-52
164.002	-62.8644	-52.6
164.001	-62.8641	-57.5
164.001	-62.8638	-62.2
164.001	-62.8638	-62.3
164	-62.8635	-66.4
164	-62.8635	-67.5
164	-62.8632	-71.8
163.999	-62.8629	-75
163.999	-62.8629	-76.2
163.998	-62.8626	-80.4
163.998	-62.8626	-80.1
163.998	-62.8623	-82.7
163.998	-62.8623	-83.9
163.997	-62.862	-87.8
163.997	-62.862	-88.7
163.997	-62.8617	-91.6
163.997	-62.8617	-91.5
163.996	-62.8614	-95.5
163.996	-62.861	-100.3
163.995	-62.8607	-104.3
163.995	-62.8607	-104.4
163.994	-62.8604	-107.7
163.994	-62.8601	-112.4
163.993	-62.8598	-115.7
163.993	-62.8598	-115.7
163.993	-62.8597	-116.2
163.993	-62.8595	-119.6
163.993	-62.8595	-120.1
163.992	-62.8592	-122.7
163.992	-62.8591	-123.8
163.992	-62.8589	-126
163.992	-62.8589	-126.9
163.991	-62.8586	-130.7
163.991	-62.8586	-130.5
163.991	-62.8585	-131.4
163.991	-62.8583	-133.3
163.99	-62.8582	-135
163.99	-62.858	-136.9
163.99	-62.8579	-137.2
163.989	-62.8577	-140.4
163.989	-62.8574	-142.7
163.989	-62.8574	-143
163.988	-62.857	-146.5
163.988	-62.857	-147.4
163.988	-62.8567	-149.5
163.988	-62.8567	-150.6
163.987	-62.8565	-152.7
163.987	-62.8564	-153
163.986	-62.8561	-156.5
163.986	-62.8558	-160.6
163.986	-62.8558	-160.9
163.985	-62.8555	-161.9
163.985	-62.8555	-163.2
163.985	-62.8552	-165.8
163.985	-62.8551	-165.8
163.984	-62.8549	-168.4
163.984	-62.8549	-169.5
163.984	-62.8546	-171.8
163.983	-62.8543	-173.2
163.982	-62.854	-176.1
163.982	-62.8539	-176.9
163.982	-62.8537	-179.2
163.982	-62.8536	-178.8
163.981	-62.8533	-182.3
163.981	-62.853	-185.2
163.98	-62.8527	-187.1
163.98	-62.8527	-187.7
163.98	-62.8525	-190.8
163.98	-62.8524	-190.8
163.979	-62.8521	-193.7
163.978	-62.8518	-195.1
163.978	-62.8518	-195.3
163.978	-62.8515	-197.4
163.978	-62.8515	-198.1
163.977	-62.851	-201.5
163.977	-62.8509	-201.7
163.976	-62.8507	-202.1
163.976	-62.8506	-202.5
163.975	-62.8503	-203.8
163.975	-62.85	-206.3
163.974	-62.8497	-206.5
163.974	-62.8497	-206.7
163.974	-62.8494	-207.9
163.974	-62.8494	-207.8
163.973	-62.849	-208.9
163.973	-62.8488	-209.9
163.973	-62.8487	-209.7
163.972	-62.8485	-211.5
163.972	-62.8484	-210.6
163.972	-62.8482	-211.9
163.971	-62.8481	-212.3
163.971	-62.8479	-213.3
163.971	-62.8479	-213.1
163.97	-62.8476	-215.1
163.97	-62.8476	-215.3
163.97	-62.8475	-214.8
163.97	-62.8473	-215.2
163.969	-62.847	-216.5
163.969	-62.8469	-216.2
163.969	-62.8467	-217.5
163.968	-62.8466	-217.3
163.968	-62.8464	-218
163.968	-62.8464	-218.4
163.967	-62.846	-219.3
163.967	-62.8458	-220.3
163.967	-62.8457	-219.9
163.966	-62.8455	-220.7
163.966	-62.8454	-221.4
163.966	-62.8451	-221.9
163.965	-62.8448	-223.3
163.965	-62.8448	-223.2
163.964	-62.8446	-223.3
163.964	-62.8445	-223.1
163.964	-62.8443	-224.7
163.964	-62.8442	-224.7
163.963	-62.844	-225.2
163.963	-62.8439	-224.8
163.963	-62.8436	-225.4
163.962	-62.8434	-226.1
163.961	-62.843	-226
163.961	-62.843	-226.5
163.961	-62.8428	-227
163.961	-62.8427	-226.8
163.96	-62.8425	-227.1
163.96	-62.8424	-227.4
163.96	-62.8421	-228.3
163.959	-62.8419	-228.7
163.959	-62.8418	-228.9
163.959	-62.8416	-229.7
163.959	-62.8415	-229.3
163.958	-62.8412	-229.6
163.958	-62.841	-229.9
163.957	-62.841	-229.6
163.957	-62.8409	-230
163.957	-62.8407	-230.9
163.957	-62.8406	-230.9
163.956	-62.8404	-232.3
163.956	-62.8401	-235.1
163.956	-62.84	-234.6
163.955	-62.8398	-236.3
163.955	-62.8397	-236.1
163.955	-62.8395	-236.6
163.954	-62.8391	-235.1
163.954	-62.8391	-234.7
163.953	-62.8389	-234.1
163.953	-62.8388	-234.1
163.953	-62.8386	-232.3
163.952	-62.8382	-229.7
163.952	-62.838	-228.9
163.952	-62.8379	-228.2
163.951	-62.8377	-227.5
163.951	-62.8377	-226.8
163.951	-62.8374	-226.2
163.95	-62.8373	-225.8
163.95	-62.8371	-224.1
163.95	-62.8371	-224.4
163.949	-62.8368	-222.9
163.949	-62.8367	-222.7
163.949	-62.8365	-221.8
163.948	-62.8362	-220.6
163.948	-62.8361	-220.5
163.948	-62.8359	-219.7
163.947	-62.8359	-218.7
163.947	-62.8356	-216.9
163.947	-62.8356	-216.4
163.946	-62.8352	-215.9
163.946	-62.8349	-213.9
163.946	-62.8349	-213.5
163.945	-62.8346	-211.8
163.945	-62.8343	-211.4
163.944	-62.834	-209.7
163.944	-62.8339	-209.3
163.943	-62.8337	-209.6
163.943	-62.8336	-209.2
163.942	-62.833	-207.6
163.942	-62.833	-207.6
163.942	-62.8328	-208.1
163.942	-62.8327	-207.2
163.942	-62.8327	-207.2
163.941	-62.8324	-206.1
163.941	-62.8321	-205.3
163.94	-62.832	-205.1
163.94	-62.8318	-204.7
163.94	-62.8317	-204.4
163.94	-62.8315	-203.8
163.94	-62.8315	-203.5
163.939	-62.8311	-203.4
163.938	-62.8309	-202.3
163.938	-62.8308	-202
163.938	-62.8306	-202.5
163.938	-62.8305	-202.4
163.937	-62.8302	-202.3
163.937	-62.83	-202.8
163.937	-62.8299	-202.2
163.936	-62.8296	-201.8
163.936	-62.8296	-202.3
163.936	-62.8293	-201.7
163.935	-62.829	-202.6
163.935	-62.829	-202.3
163.934	-62.8287	-202.6
163.934	-62.8287	-203
163.934	-62.8284	-202.2
163.933	-62.828	-202.6
163.933	-62.828	-203.2
163.933	-62.8277	-201.9
163.933	-62.8277	-202.2
163.932	-62.8274	-203.2
163.931	-62.8271	-202.7
163.931	-62.8269	-203
163.931	-62.8268	-203.5
163.93	-62.8265	-202.2
163.93	-62.8265	-202.4
163.93	-62.8262	-202.5
163.929	-62.8259	-202.9
163.929	-62.8259	-202.4
163.929	-62.8257	-201
163.929	-62.8256	-201.3
163.929	-62.8256	-200.6
163.928	-62.8253	-200.8
163.928	-62.825	-200.3
163.928	-62.825	-199.4
163.927	-62.8247	-198.6
163.927	-62.8247	-199.5
163.927	-62.8247	-199.5
163.927	-62.8245	-198.5
163.927	-62.8244	-198.5
163.926	-62.8241	-198.3
163.926	-62.8239	-197.7
163.926	-62.8238	-197.9
163.925	-62.8238	-198.5
163.925	-62.8235	-197.1
163.924	-62.8232	-197.5
163.924	-62.8229	-196.8
163.924	-62.8229	-196.8
163.924	-62.8228	-196.6
163.923	-62.8226	-196.2
163.923	-62.8226	-196.4
163.923	-62.8225	-196.1
163.923	-62.8223	-196.5
163.922	-62.822	-196.4
163.922	-62.8219	-196.7
163.922	-62.8217	-196.3
163.922	-62.8216	-195.8
163.921	-62.8216	-196.1
163.921	-62.8213	-195.9
163.92	-62.821	-195.9
163.92	-62.8209	-195.5
163.92	-62.8207	-195
163.92	-62.8206	-195.4
163.919	-62.8204	-196.1
163.919	-62.82	-194.7
163.918	-62.8198	-194.7
163.918	-62.8197	-194.9
163.918	-62.8197	-195.2
163.918	-62.8194	-196.3
163.918	-62.8194	-196.1
163.917	-62.8191	-196.7
163.917	-62.8188	-197.2
163.916	-62.8188	-197.5
163.916	-62.8186	-196.6
163.916	-62.8185	-197.4
163.916	-62.8185	-197.4
163.915	-62.8183	-198.2
163.915	-62.8182	-199.5
163.915	-62.818	-200.6
163.915	-62.8179	-200.4
163.914	-62.8177	-202.4
163.914	-62.8177	-202.8
163.914	-62.8174	-204.5
163.913	-62.8171	-205.2
163.913	-62.817	-205.8
163.913	-62.8168	-206.9
163.913	-62.8167	-207.9
163.912	-62.8165	-208.1
163.911	-62.8161	-208.1
163.911	-62.8159	-205.7
163.911	-62.8158	-205.7
163.91	-62.8156	-202.5
163.91	-62.8155	-202.6
163.91	-62.8152	-201
163.909	-62.8149	-198.8
163.909	-62.8149	-198.4
163.909	-62.8146	-197.6
163.909	-62.8146	-196.9
163.908	-62.8145	-196.4
163.908	-62.8143	-195.6
163.907	-62.814	-194.2
163.907	-62.8139	-193.7
163.907	-62.8137	-192.9
163.907	-62.8137	-193.2
163.906	-62.8134	-192.1
163.906	-62.8134	-192.2
163.906	-62.8131	-190.8
163.906	-62.813	-190.3
163.905	-62.8128	-191
163.905	-62.8127	-190.7
163.905	-62.8125	-189.3
163.904	-62.8121	-189.3
163.903	-62.8119	-189.2
163.903	-62.8118	-189.6
163.903	-62.8116	-188.5
163.903	-62.8115	-189.7
163.902	-62.811	-191.7
163.902	-62.8109	-192.5
163.901	-62.8107	-190.4
163.901	-62.8106	-190.1
163.901	-62.8104	-189.2
163.9	-62.8103	-189.1
163.9	-62.81	-187.6
163.9	-62.81	-187.8
163.899	-62.8097	-186.6
163.899	-62.8097	-186.3
163.899	-62.8094	-186.8
163.899	-62.8094	-187
163.898	-62.8091	-186.9
163.898	-62.8088	-186.5
163.898	-62.8088	-186.8
163.898	-62.8087	-187.3
163.897	-62.8085	-184.7
163.897	-62.8084	-185.2
163.896	-62.8081	-183.6
163.896	-62.8079	-182.7
163.896	-62.8078	-182.5
163.895	-62.8076	-182.5
163.895	-62.8076	-182.4
163.895	-62.8075	-182.4
163.895	-62.8073	-182.3
163.894	-62.8069	-181.8
163.894	-62.8069	-181.5
163.894	-62.8066	-181.3
163.894	-62.8066	-181
163.893	-62.8066	-181.1
163.893	-62.8063	-180.4
163.892	-62.806	-178.5
163.892	-62.8059	-178.3
163.892	-62.8057	-178.1
163.892	-62.8056	-177.6
163.891	-62.8054	-177.2
163.891	-62.8053	-177.3
163.891	-62.805	-175.4
163.89	-62.8048	-175.8
163.89	-62.8047	-175.3
163.89	-62.8047	-175.2
163.89	-62.8044	-174.3
163.889	-62.8044	-174.9
163.889	-62.8041	-175.1
163.889	-62.804	-173.6
163.888	-62.8038	-173
163.888	-62.8037	-172.6
163.888	-62.8035	-173.9
163.888	-62.8034	-173.4
163.888	-62.8034	-173.7
163.887	-62.8032	-171.8
163.887	-62.8028	-171.5
163.887	-62.8028	-170.9
163.886	-62.8025	-169.8
163.886	-62.8025	-169.9
163.885	-62.8022	-168.2
163.885	-62.8019	-167.3
163.885	-62.8018	-166.6
163.884	-62.8016	-166.3
163.884	-62.8016	-166.1
163.884	-62.8015	-165.7
163.884	-62.8013	-165.9
163.884	-62.8013	-165.3
163.883	-62.8009	-165
163.883	-62.8007	-164.6
163.882	-62.8006	-164.7
163.882	-62.8003	-163.8
163.882	-62.8003	-164.2
163.881	-62.8001	-164.2
163.881	-62.8	-163.2
163.881	-62.7998	-163.4
163.881	-62.7997	-163.8
163.88	-62.7994	-162.9
163.88	-62.7994	-162.8
163.88	-62.7991	-162.8
163.879	-62.7988	-163.1
163.879	-62.7985	-162.2
163.878	-62.7985	-161.3
163.878	-62.7982	-160.4
163.877	-62.7979	-161.1
163.877	-62.7976	-159.8
163.877	-62.7976	-159.1
163.877	-62.7976	-159
163.876	-62.7973	-158.3
163.876	-62.7973	-157.9
163.876	-62.797	-158.3
163.876	-62.7969	-157
163.875	-62.7967	-156.3
163.875	-62.7966	-156.4
163.875	-62.7966	-156.1
163.875	-62.7964	-155.9
163.874	-62.7963	-155.3
163.874	-62.7961	-155.3
163.873	-62.7957	-154
163.873	-62.7957	-154.8
163.873	-62.7954	-154.1
163.873	-62.7954	-154.8
163.872	-62.7951	-153.7
163.872	-62.7948	-152.2
163.871	-62.7946	-152.8
163.871	-62.7945	-153
163.871	-62.7945	-152.3
163.871	-62.7942	-151.2
163.87	-62.7942	-151
163.87	-62.7939	-150.4
163.869	-62.7936	-151.3
163.869	-62.7935	-151.3
163.869	-62.7935	-151.3
163.869	-62.7933	-150.9
163.869	-62.7932	-151.8
163.868	-62.7929	-151.6
163.868	-62.7927	-150.8
163.868	-62.7926	-151.2
163.867	-62.7923	-150.2
163.867	-62.7923	-150
163.867	-62.792	-148.6
163.866	-62.7917	-148
163.866	-62.7917	-148.5
163.865	-62.7914	-148.4
163.865	-62.7914	-148.6
163.865	-62.7911	-148.4
163.864	-62.7908	-148.3
163.864	-62.7905	-147.6
163.864	-62.7904	-147.9
163.863	-62.7902	-147.9
163.863	-62.7902	-148
163.863	-62.7899	-147.8
163.863	-62.7898	-147.6
163.862	-62.7896	-147.9
163.862	-62.7895	-148.4
163.862	-62.7893	-147.8
163.861	-62.7892	-147.8
163.861	-62.789	-148
163.861	-62.7889	-148
163.86	-62.7886	-146.8
163.86	-62.7886	-146.5
163.86	-62.7884	-147
163.86	-62.7883	-147.3
163.86	-62.7883	-147.7
163.859	-62.7881	-146.7
163.859	-62.7877	-147
163.858	-62.7874	-147.4
163.858	-62.7874	-147.5
163.858	-62.7871	-146.5
163.857	-62.7871	-146.8
163.857	-62.7867	-146.8
163.856	-62.7864	-146.3
163.856	-62.7864	-146.9
163.856	-62.7861	-146.9
163.856	-62.7861	-146.3
163.855	-62.7859	-146.5
163.855	-62.7858	-146.8
163.855	-62.7855	-145.7
163.855	-62.7855	-145.8
163.855	-62.7854	-145.4
163.854	-62.7852	-145.3
163.854	-62.7852	-145.6
163.854	-62.7849	-145.6
163.853	-62.7848	-145.7
163.853	-62.7846	-144.8
163.853	-62.7846	-144.5
163.852	-62.7843	-144.8
163.852	-62.7843	-144.6
163.852	-62.784	-144.2
163.851	-62.7837	-144.1
163.851	-62.7836	-144.2
163.851	-62.7834	-144.1
163.851	-62.7833	-143.8
163.85	-62.7831	-142.9
163.85	-62.783	-142.9
163.85	-62.7827	-141.8
163.849	-62.7824	-140.9
163.849	-62.7824	-141.3
163.849	-62.7823	-141.1
163.849	-62.7821	-141.2
163.848	-62.7821	-141.3
163.848	-62.7818	-140.3
163.848	-62.7817	-140
163.847	-62.7815	-140
163.847	-62.7814	-140
163.847	-62.7812	-139.4
163.847	-62.7811	-140.2
163.846	-62.7808	-139.1
163.846	-62.7807	-139
163.846	-62.7805	-138.9
163.846	-62.7804	-138.3
163.845	-62.7802	-138
163.845	-62.7801	-137.6
163.845	-62.7799	-137.7
163.845	-62.7798	-137
163.844	-62.7795	-137.9
163.843	-62.7792	-136.9
163.843	-62.7792	-136.1
163.843	-62.7789	-136.8
163.843	-62.7789	-136.8
163.842	-62.7786	-135.6
163.842	-62.7783	-136.2
163.842	-62.7782	-136.4
163.841	-62.778	-135.9
163.841	-62.7779	-135.8
163.841	-62.7777	-135.6
163.84	-62.7776	-135.6
163.84	-62.7774	-135.7
163.84	-62.7773	-135.1
163.839	-62.777	-135
163.839	-62.777	-134.4
163.839	-62.7767	-134.8
163.838	-62.7764	-133
163.838	-62.7761	-132.7
163.837	-62.776	-132.3
163.837	-62.7758	-130.9
163.837	-62.7757	-131.3
163.836	-62.7754	-130.9
163.836	-62.7751	-129.9
163.836	-62.7751	-129.7
163.835	-62.7748	-129
163.835	-62.7748	-130
163.835	-62.7745	-127.8
163.834	-62.7742	-128
163.834	-62.7742	-127.8
163.834	-62.7741	-127.5
163.834	-62.7739	-126.5
163.833	-62.7738	-126.6
163.833	-62.7736	-126.1
163.832	-62.7733	-125.4
163.832	-62.7732	-124.7
163.832	-62.7729	-124.8
163.831	-62.7727	-124.1
163.83	-62.7723	-123.5
163.83	-62.7723	-123.7
163.83	-62.772	-123.3
163.83	-62.772	-122.6
163.829	-62.7717	-122.3
163.829	-62.7714	-120.2
163.828	-62.7711	-119.7
163.828	-62.7711	-118.6
163.828	-62.771	-119.3
163.828	-62.7708	-118.1
163.828	-62.7707	-117.5
163.827	-62.7705	-116.4
163.827	-62.7704	-116
163.827	-62.7702	-114.8
163.826	-62.7701	-114.9
163.826	-62.7698	-113.1
163.826	-62.7698	-113.3
163.825	-62.7696	-111.7
163.825	-62.7692	-110.2
163.825	-62.7692	-110.5
163.824	-62.7689	-109.6
163.824	-62.7689	-110.3
163.824	-62.7686	-109.3
163.823	-62.7683	-107.7
163.823	-62.768	-107.3
163.822	-62.768	-106.5
163.822	-62.7677	-105.9
163.822	-62.7677	-105.9
163.821	-62.7674	-104.2
163.821	-62.7671	-103.2
163.821	-62.7671	-103.3
163.821	-62.767	-102.9
163.82	-62.7668	-101.3
163.82	-62.7667	-101.1
163.82	-62.7665	-100.3
163.819	-62.7662	-97.7
163.819	-62.7661	-97.6
163.818	-62.7658	-96
163.818	-62.7658	-96.2
163.818	-62.7655	-96.2
163.817	-62.7652	-93.5
163.817	-62.7652	-93.5
163.817	-62.7649	-91.9
163.817	-62.7649	-92.2
163.816	-62.7646	-90.1
163.816	-62.7646	-90.3
163.815	-62.7643	-87.7
163.815	-62.764	-87.4
163.815	-62.764	-86.7
163.815	-62.7639	-85.6
163.814	-62.7637	-84.7
163.814	-62.7636	-85.3
163.814	-62.7633	-82.5
163.813	-62.7631	-81.3
163.813	-62.763	-81.4
163.813	-62.7627	-79.8
163.813	-62.7627	-79.2
163.812	-62.7625	-78
163.812	-62.7624	-78.1
163.812	-62.7622	-76.6
163.812	-62.7621	-75.8
163.811	-62.7619	-74.8
163.811	-62.7618	-75
163.811	-62.7618	-74.4
163.81	-62.7615	-72.5
163.81	-62.7612	-70.3
163.809	-62.7609	-68.4
163.809	-62.7608	-68.6
163.809	-62.7606	-66.2
163.809	-62.7606	-66.6
163.808	-62.7602	-63.8
163.808	-62.76	-63
163.808	-62.76	-62.1
163.808	-62.7599	-62.4
163.807	-62.7597	-59.8
163.807	-62.7596	-59.7
163.807	-62.7594	-58.1
163.806	-62.7593	-58.4
163.806	-62.759	-55.5
163.806	-62.759	-55.6
163.806	-62.7589	-55.6
163.805	-62.7587	-53.7
163.805	-62.7586	-53.6
163.805	-62.7584	-51.3
163.804	-62.758	-49.4
163.804	-62.758	-49.1
163.804	-62.7577	-47.8
163.804	-62.7577	-48
163.803	-62.7574	-44.9
163.803	-62.7574	-44.5
163.802	-62.7571	-42.3
163.802	-62.7568	-39.5
163.802	-62.7567	-39.5
163.801	-62.7565	-37.5
163.801	-62.7564	-36.9
163.801	-62.7561	-34.7
163.8	-62.7558	-32.1
163.8	-62.7555	-29.1
163.8	-62.7555	-28.9
163.8	-62.7554	-28.7
163.799	-62.7551	-25.9
163.798	-62.7549	-23.5
163.798	-62.7548	-23.6
163.798	-62.7545	-20.3
163.797	-62.7543	-17.3
163.797	-62.7539	-14.2
163.797	-62.7539	-14.2
163.796	-62.7536	-10.3
163.796	-62.7536	-10.6
163.796	-62.7533	-7
163.796	-62.7533	-6.7
163.795	-62.7529	-3.5
163.794	-62.7526	1.2
163.794	-62.7526	0.7
163.794	-62.7523	3.6
163.794	-62.7523	4.4
163.793	-62.7519	7.7
163.793	-62.7517	11.5
163.793	-62.7517	12.3
163.792	-62.7515	15.2
163.792	-62.7514	15.3
163.792	-62.7514	15.7
163.792	-62.7511	19.2
163.791	-62.7508	23.8
163.791	-62.7507	24.6
163.791	-62.7505	27.6
163.79	-62.7505	28.3
163.79	-62.7504	28.3
163.79	-62.7502	31.5
163.79	-62.7502	32.7
163.789	-62.7499	37.1
163.789	-62.7498	37.7
163.789	-62.7497	40.6
163.789	-62.7496	41.5
163.789	-62.7496	41.8
163.788	-62.7493	44.9
163.788	-62.7493	46.5
163.788	-62.7489	50.6
163.787	-62.7487	54.6
163.787	-62.7486	55.5
163.787	-62.7486	56.9
163.787	-62.7483	59.7
163.786	-62.7483	61.7
163.786	-62.748	64.1
163.785	-62.7477	69.8
163.785	-62.7474	73.2
163.785	-62.7474	74.3
163.785	-62.7473	74.1
163.784	-62.7471	77.5
163.784	-62.7468	82.8
163.784	-62.7467	83.8
163.783	-62.7465	87.2
163.783	-62.7464	88.1
163.783	-62.7461	92.4
163.782	-62.7458	97.4
163.781	-62.7455	101.2
163.781	-62.7455	102.2
163.781	-62.7453	106.1
163.781	-62.7452	107.4
163.78	-62.7449	112.2
163.78	-62.7446	116.1
163.78	-62.7446	116.8
163.779	-62.7443	120.4
163.779	-62.7442	122
163.779	-62.7439	126.7
163.778	-62.7437	130.9
163.778	-62.7436	131.2
163.778	-62.7434	135.1
163.777	-62.7433	136.4
163.777	-62.7433	137.5
163.777	-62.743	140.7
163.776	-62.7427	145.9
163.776	-62.7427	147.3
163.776	-62.7424	150.6
163.776	-62.7424	151.6
163.775	-62.7422	155.7
163.775	-62.7421	156.8
163.775	-62.7418	162.4
163.774	-62.7415	165.7
163.774	-62.7412	170.8
163.774	-62.7412	171.3
163.773	-62.7408	176.7
163.773	-62.7406	180.1
163.772	-62.7405	180.4
163.772	-62.7403	184.2
163.772	-62.7403	184.6
163.772	-62.7402	184.1
163.771	-62.74	188.4
163.771	-62.7396	193.8
163.771	-62.7396	193.6
163.77	-62.7394	197.2
163.77	-62.7393	196.9
163.77	-62.7393	198.4
163.77	-62.739	202
163.769	-62.7387	206
163.769	-62.7386	206.4
163.769	-62.7384	210.2
163.768	-62.7384	210.6
163.768	-62.7381	214.4
163.767	-62.7377	218.2
163.767	-62.7375	220.4
163.767	-62.7374	220.7
163.767	-62.7374	221.7
163.766	-62.7371	225.5
163.766	-62.7368	228.7
163.765	-62.7365	231.8
163.765	-62.7365	231.8
163.765	-62.7363	234.4
163.764	-62.7362	234.4
163.764	-62.7362	236.5
163.764	-62.7359	239.1
163.763	-62.7356	242.9
163.763	-62.7356	243.4
163.763	-62.7353	245.7
163.763	-62.7353	245.6
163.763	-62.7352	246.7
163.762	-62.735	248.1
163.762	-62.735	248.4
163.762	-62.7346	251.9
163.761	-62.7343	254.3
163.761	-62.7343	255.4
163.761	-62.734	258.2
163.76	-62.7336	261.4
163.759	-62.7334	262.8
163.759	-62.7333	263.9
163.759	-62.7331	265.4
163.759	-62.733	266.2
163.759	-62.733	266.6
163.758	-62.7327	269.2
163.758	-62.7324	271.9
163.758	-62.7324	271.2
163.757	-62.7321	273
163.757	-62.732	273.8
163.757	-62.7318	274.8
163.756	-62.7314	277
163.756	-62.7314	277.6
163.756	-62.7312	278.8
163.755	-62.7311	278.5
163.755	-62.7309	279.9
163.755	-62.7308	280.1
163.754	-62.7305	281
163.754	-62.7302	281.6
163.754	-62.7301	281.8
163.753	-62.7299	283.1
163.753	-62.7298	283.1
163.753	-62.7296	283.3
163.753	-62.7295	283.4
163.752	-62.7292	284.9
163.752	-62.7292	283.9
163.752	-62.7289	285
163.751	-62.7289	285.3
163.751	-62.7286	284.7
163.751	-62.7285	285.1
163.75	-62.7283	286.6
163.75	-62.7282	286.2
163.75	-62.728	285.3
163.75	-62.7279	285.8
163.75	-62.7279	285.8
163.749	-62.7276	285.4
163.749	-62.7273	285.3
163.748	-62.727	285.4
163.748	-62.727	285.6
163.748	-62.7269	285.4
163.748	-62.7266	284.1
163.747	-62.7262	283.7
163.747	-62.726	282.6
163.747	-62.7259	283
163.746	-62.7257	282.7
163.746	-62.7256	282.2
163.745	-62.7253	281.5
163.745	-62.725	281.1
163.745	-62.725	279.9
163.744	-62.7247	280.4
163.744	-62.7246	279.6
163.744	-62.7244	279.3
163.743	-62.724	277.4
163.743	-62.724	276.7
163.743	-62.7238	276.3
163.743	-62.7237	276.3
163.743	-62.7237	276.1
163.742	-62.7234	275
163.742	-62.7231	273.2
163.741	-62.7228	271.7
163.741	-62.7228	271.2
163.74	-62.7225	269.4
163.74	-62.7225	269.5
163.74	-62.7221	266.7
163.739	-62.7218	265.7
163.739	-62.7218	265.3
163.739	-62.7215	262.8
163.739	-62.7215	262.1
163.738	-62.7213	261.9
163.738	-62.7209	259.1
163.737	-62.7209	258.8
163.737	-62.7206	257.5
163.737	-62.7206	257.5
163.737	-62.7205	257.1
163.736	-62.7203	255.3
163.736	-62.72	252.4
163.736	-62.7199	252.8
163.735	-62.7197	251.2
163.735	-62.7197	250.1
163.735	-62.7194	248.5
163.734	-62.719	245.8
163.734	-62.719	245.7
163.734	-62.7187	243.6
163.734	-62.7187	243.1
163.733	-62.7184	242.7
163.733	-62.7184	242.2
163.732	-62.7181	238.6
163.732	-62.7178	237
163.732	-62.7178	236.5
163.731	-62.7175	234.2
163.731	-62.7175	234.2
163.731	-62.7172	231.5
163.731	-62.7171	231.3
163.73	-62.7169	229
163.73	-62.7168	228.3
163.73	-62.7165	226.9
163.729	-62.7163	222.8
163.728	-62.7159	220.2
163.728	-62.7156	216.7
163.728	-62.7156	216.2
163.727	-62.7154	214
163.727	-62.7153	213.6
163.727	-62.715	210.5
163.726	-62.7147	208.1
163.726	-62.7147	207.1
163.726	-62.7144	203.8
163.726	-62.7144	204.1
163.725	-62.714	201.2
163.725	-62.7138	198.4
163.725	-62.7137	197.5
163.724	-62.7135	195
163.724	-62.7134	195
163.724	-62.7134	194.2
163.723	-62.7131	192.5
163.723	-62.7128	188.2
163.723	-62.7128	188.6
163.722	-62.7125	185.7
163.722	-62.7122	182.7
163.721	-62.7119	179.3
163.721	-62.7116	176.9
163.72	-62.7115	177.3
163.72	-62.7113	174.9
163.719	-62.7109	171.3
163.719	-62.7107	169.7
163.719	-62.7107	168.8
163.719	-62.7106	168.7
163.718	-62.7104	167.1
163.718	-62.7104	165.9
163.718	-62.7103	165.7
163.718	-62.7101	164.1
163.718	-62.71	162.8
163.717	-62.7097	161
163.717	-62.7097	160.3
163.717	-62.7094	158
163.716	-62.7091	154.9
163.715	-62.7088	151.8
163.715	-62.7088	151.6
163.715	-62.7085	149.3
163.715	-62.7085	148.8
163.714	-62.7082	146.8
163.714	-62.7082	146.8
163.714	-62.7079	143.2
163.713	-62.7076	141.2
163.713	-62.7076	140.3
163.713	-62.7075	140.5
163.713	-62.7073	139
163.713	-62.7073	138.2
163.712	-62.7069	135.2
163.712	-62.7067	132.3
163.712	-62.7067	132
163.711	-62.7064	129.9
163.711	-62.7064	129.7
163.711	-62.7063	129.2
163.71	-62.706	125.8
163.71	-62.7058	123.8
163.71	-62.7057	123.3
163.709	-62.7055	120.7
163.709	-62.7054	120.1
163.709	-62.7052	117.6
163.709	-62.7051	117.3
163.708	-62.7047	114.4
163.708	-62.7044	112.2
163.708	-62.7044	111.5
163.707	-62.7041	109.7
163.707	-62.7041	108.7
163.706	-62.7038	106.3
163.706	-62.7035	103.1
163.706	-62.7035	102.5
163.705	-62.7032	100.9
163.705	-62.7032	100.5
163.705	-62.7029	97.1
163.704	-62.7027	95
163.704	-62.7026	94.3
163.704	-62.7023	93.4
163.704	-62.7023	92.3
163.703	-62.7021	90.5
163.703	-62.7018	88.8
163.702	-62.7017	87.8
163.702	-62.7015	86.7
163.702	-62.7014	86.5
163.701	-62.7012	85.3
163.701	-62.7012	85.2
163.701	-62.7008	83.3
163.7	-62.7006	81.5
163.7	-62.7005	81.8
163.7	-62.7005	81.6
163.7	-62.7002	80.1
163.699	-62.6999	79
163.699	-62.6996	78
163.699	-62.6996	78
163.699	-62.6995	78.1
163.698	-62.6993	76.9
163.698	-62.6992	76.6
163.698	-62.699	75.7
163.697	-62.6986	75.9
163.697	-62.6986	75.9
163.696	-62.6983	75.3
163.696	-62.6983	75
163.696	-62.698	74.7
163.695	-62.6977	75.1
163.695	-62.6976	74.9
163.695	-62.6974	74.5
163.695	-62.6973	74.2
163.694	-62.6971	75.3
163.694	-62.697	74.9
163.693	-62.6967	75.9
163.693	-62.6965	76.1
163.693	-62.6964	76
163.693	-62.6964	75.9
163.692	-62.6961	76.9
163.692	-62.6961	76.8
163.692	-62.6959	78.6
163.692	-62.6958	78.6
163.691	-62.6955	80
163.691	-62.6955	79.8
163.691	-62.6954	78.9
163.691	-62.6952	80.8
163.691	-62.6952	81.3
163.69	-62.6949	82.3
163.69	-62.6946	84.2
163.689	-62.6945	84.2
163.689	-62.6943	86.1
163.689	-62.6942	86.4
163.688	-62.694	87
163.688	-62.6939	88.5
163.688	-62.6936	90.3
163.688	-62.6935	90.7
163.687	-62.6933	93.8
163.687	-62.6933	94.3
163.687	-62.693	96.3
163.686	-62.6927	99.5
163.686	-62.6926	100.2
163.686	-62.6924	101.2
163.686	-62.6924	101.5
163.685	-62.6923	102.8
163.685	-62.6921	105.5
163.685	-62.692	105.6
163.684	-62.6918	108.4
163.684	-62.6917	109.7
163.684	-62.6915	111.9
163.684	-62.6914	113.3
163.683	-62.6912	115.2
163.683	-62.6911	115.3
163.683	-62.691	115.9
163.683	-62.6908	119.6
163.682	-62.6904	123.3
163.682	-62.6904	123.8
163.682	-62.6901	128.4
163.682	-62.6901	127.8
163.681	-62.6898	132.2
163.681	-62.6895	136.8
163.68	-62.6893	139.4
163.68	-62.6892	140.2
163.68	-62.6892	141.3
163.679	-62.6889	143.7
163.679	-62.6889	144.8
163.679	-62.6885	149.8
163.678	-62.6883	153
163.678	-62.6882	153.5
163.678	-62.6879	156.9
163.678	-62.6879	157.9
163.677	-62.6873	165.9
163.677	-62.6872	166.9
163.676	-62.687	169.7
163.676	-62.6869	170.9
163.676	-62.6869	171.3
163.676	-62.6867	174.4
163.675	-62.6863	179.4
163.675	-62.6863	180.1
163.674	-62.686	182.7
163.674	-62.686	183.7
163.674	-62.6857	186.8
163.674	-62.6857	187.5
163.673	-62.6853	192.3
163.673	-62.6853	193.1
163.673	-62.6851	196.1
163.673	-62.685	196.8
163.672	-62.6848	198.7
163.672	-62.6847	200.4
163.671	-62.6844	204.3
163.671	-62.6842	207.1
163.671	-62.6841	207.6
163.671	-62.6839	209.5
163.67	-62.6838	210.6
163.67	-62.6838	210.6
163.67	-62.6835	214
163.67	-62.6834	214.8
163.669	-62.6832	217.6
163.669	-62.6831	217.5
163.669	-62.6829	220.6
163.669	-62.6829	221
163.668	-62.6826	223.3
163.668	-62.6826	222.9
163.668	-62.6823	226.8
163.668	-62.6822	226.9
163.667	-62.682	228
163.667	-62.6819	228.9
163.667	-62.6817	230.3
163.666	-62.6816	231.9
163.666	-62.6814	232.8
163.666	-62.6813	233.4
163.665	-62.6811	234.6
163.665	-62.681	234.8
163.665	-62.6808	236.1
163.665	-62.6807	237.2
163.664	-62.6805	238
163.664	-62.6804	237.8
163.664	-62.6801	238.8
163.664	-62.6801	238.7
163.663	-62.6799	239.8
163.663	-62.6798	240.3
163.663	-62.6798	240.7
163.663	-62.6795	240.2
163.662	-62.6792	240.4
163.662	-62.6791	240.2
163.662	-62.6789	241
163.661	-62.6789	240.1
163.661	-62.6787	240.5
163.661	-62.6786	239.6
163.66	-62.6783	239.9
163.66	-62.6783	240.2
163.66	-62.6781	239.9
163.66	-62.678	239.5
163.66	-62.678	239.2
163.659	-62.6778	237.9
163.659	-62.6777	238.2
163.659	-62.6774	237.3
163.658	-62.6771	235.5
163.658	-62.6771	235.7
163.658	-62.6768	234.9
163.658	-62.6768	235.3
163.658	-62.6767	233.8
163.657	-62.6764	233.1
163.656	-62.6761	230
163.656	-62.676	230.2
163.656	-62.6758	228.9
163.656	-62.6757	228.1
163.655	-62.6755	225.1
163.655	-62.6752	222.5
163.655	-62.6751	222
163.654	-62.6748	219.4
163.654	-62.6748	219.1
163.654	-62.6744	216.2
163.653	-62.6741	212
163.653	-62.6738	208.5
163.652	-62.6737	207.6
163.652	-62.6735	205.3
163.652	-62.6735	205.1
163.651	-62.6733	200.7
163.651	-62.6732	198.6
163.651	-62.6729	196.5
163.651	-62.6729	195.3
163.65	-62.6726	190.6
163.65	-62.6725	189.9
163.65	-62.6723	186.1
163.649	-62.6719	180.3
163.649	-62.6719	179.8
163.649	-62.6717	175.1
163.649	-62.6716	173.6
163.648	-62.6713	169.5
163.647	-62.671	162.6
163.647	-62.671	161.4
163.647	-62.6707	157.1
163.647	-62.6707	156.6
163.646	-62.6704	151.3
163.646	-62.6704	150.8
163.646	-62.6702	145.4
163.646	-62.6701	143.6
163.645	-62.6698	138.4
163.645	-62.6698	136.8
163.645	-62.6695	131.9
163.645	-62.6695	130.8
163.645	-62.6694	130.1
163.644	-62.6692	125.6
163.644	-62.6691	122.5
163.644	-62.6688	117.8
163.643	-62.6688	116.6
163.643	-62.6686	111.3
163.643	-62.6685	109.8
163.643	-62.6685	108.8
163.642	-62.6682	103.7
163.642	-62.6679	95.7
163.642	-62.6679	94.7
163.641	-62.6676	90.2
163.641	-62.6676	87.9
163.641	-62.6673	82.1
163.64	-62.667	73.5
163.64	-62.6669	72.5
163.64	-62.6667	67.3
163.64	-62.6666	66
163.639	-62.6664	61
163.639	-62.6663	59.1
163.638	-62.666	51.5
163.638	-62.6658	46.6
163.638	-62.6657	44.6
163.637	-62.6654	38.5
163.637	-62.6654	37.4
163.637	-62.6651	31.7
163.637	-62.665	29.4
163.636	-62.6648	24.5
163.636	-62.6648	23.1
163.636	-62.6645	17.3
163.636	-62.6645	16.4
163.636	-62.6644	15.7
163.635	-62.6642	10.2
163.635	-62.6639	3.5
163.635	-62.6639	1.5
163.634	-62.6636	-4.6
163.634	-62.6636	-4.6
163.634	-62.6633	-9.5
163.634	-62.6633	-11.6
163.633	-62.6629	-18.4
163.632	-62.6627	-24.4
163.632	-62.6626	-25.5
163.632	-62.6624	-30.1
163.632	-62.6623	-31.4
163.631	-62.662	-38
163.631	-62.6618	-43.6
163.631	-62.6617	-44.6
163.631	-62.6617	-45.6
163.63	-62.6615	-49.1
163.63	-62.6614	-50.2
163.63	-62.6614	-50.6
163.63	-62.6611	-56.3
163.629	-62.6608	-62.3
163.629	-62.6608	-63.2
163.629	-62.6605	-67.6
163.628	-62.6605	-68.4
163.628	-62.6604	-69.4
163.628	-62.6602	-74.6
163.627	-62.6599	-79.9
163.627	-62.6596	-85.2
163.627	-62.6595	-85.5
163.626	-62.6593	-89.6
163.626	-62.6592	-90.3
163.626	-62.6589	-95.2
163.625	-62.6586	-99.3
163.625	-62.6586	-99.5
163.625	-62.6585	-100.2
163.625	-62.6583	-103.7
163.625	-62.6582	-104.6
163.624	-62.6579	-109.8
163.624	-62.6576	-111.3
163.623	-62.6576	-112.8
163.623	-62.6574	-115.6
163.623	-62.6573	-115.6
163.623	-62.6573	-116.5
163.622	-62.657	-119.6
163.622	-62.6567	-122.4
163.622	-62.6567	-123.6
163.621	-62.6564	-126.1
163.621	-62.6564	-126.9
163.621	-62.6561	-129.5
163.621	-62.6561	-129.4
163.62	-62.6557	-132.2
163.62	-62.6555	-134.7
163.62	-62.6555	-134.6
163.62	-62.6554	-135.8
163.619	-62.6551	-137.8
163.619	-62.6549	-140
163.618	-62.6548	-140.4
163.618	-62.6545	-141.7
163.618	-62.6545	-142.1
163.617	-62.6542	-143.9
163.617	-62.6542	-144.1
163.617	-62.6542	-144.3
163.617	-62.6539	-145.5
163.617	-62.6538	-146.6
163.616	-62.6536	-147.5
163.616	-62.6535	-148
163.616	-62.6532	-148.5
163.615	-62.6529	-149.8
163.615	-62.6526	-151.5
163.614	-62.6523	-151.9
163.614	-62.6522	-151.3
163.614	-62.6522	-151.9
163.613	-62.6519	-152.9
163.613	-62.6516	-153
163.612	-62.6514	-152.9
163.612	-62.6513	-153.2
163.612	-62.6513	-153.4
163.612	-62.651	-153.7
163.612	-62.651	-153.7
163.611	-62.6507	-153.3
163.611	-62.6506	-153.6
163.611	-62.6504	-153.4
163.611	-62.6504	-153.9
163.611	-62.6503	-153
163.61	-62.6501	-153.3
163.61	-62.6501	-153.1
163.61	-62.65	-153.5
163.61	-62.6498	-152.8
163.609	-62.6494	-152.8
163.609	-62.6494	-152.3
163.608	-62.6491	-150.9
163.608	-62.6491	-152
163.608	-62.649	-151.7
163.608	-62.6488	-152
163.607	-62.6484	-149.9
163.607	-62.6484	-149.7
163.607	-62.6482	-149.4
163.607	-62.6481	-149
163.606	-62.6479	-148.6
163.606	-62.6479	-148.6
163.606	-62.6476	-146.7
163.605	-62.6475	-147.4
163.605	-62.6472	-146.3
163.605	-62.6472	-146.2
163.605	-62.6471	-145.5
163.604	-62.6469	-144.9
163.604	-62.6469	-144.4
163.604	-62.6469	-144.2
163.604	-62.6466	-143.3
163.604	-62.6465	-142.1
163.603	-62.6463	-141.8
163.603	-62.6463	-141
163.603	-62.6461	-139.5
163.603	-62.646	-139.6
163.603	-62.646	-138.7
163.602	-62.6457	-138.1
163.602	-62.6454	-136.5
163.602	-62.6454	-135.7
163.601	-62.6452	-133.9
163.601	-62.6452	-134.2
163.601	-62.6451	-134.4
163.601	-62.6449	-132.1
163.6	-62.6449	-131.6
163.6	-62.6446	-130.5
163.599	-62.6443	-128.1
163.599	-62.6443	-127.4
163.599	-62.6442	-127.1
163.599	-62.644	-125.6
163.599	-62.644	-125.6
163.598	-62.6437	-123.8
163.598	-62.6436	-123.9
163.598	-62.6434	-121.2
163.598	-62.6433	-121.6
163.597	-62.6431	-119.5
163.597	-62.643	-119
163.597	-62.6428	-117.1
163.597	-62.6427	-116.3
163.596	-62.6425	-114.3
163.596	-62.6424	-114.4
163.596	-62.6422	-112.1
163.595	-62.6421	-111.7
163.595	-62.6421	-111.5
163.595	-62.6418	-110.8
163.594	-62.6415	-106.8
163.594	-62.6413	-105.2
163.594	-62.6412	-105.5
163.594	-62.6412	-104.8
163.593	-62.641	-103.7
163.593	-62.6409	-102.8
163.593	-62.6406	-100.2
163.592	-62.6403	-98.5
163.592	-62.6403	-98.1
163.592	-62.6402	-96.8
163.592	-62.64	-95.7
163.592	-62.64	-95.3
163.591	-62.6397	-93.8
163.591	-62.6397	-94
163.591	-62.6394	-90.8
163.591	-62.6394	-90.8
163.59	-62.6391	-89
163.59	-62.6391	-89.1
163.59	-62.6388	-86.6
163.589	-62.6385	-84.4
163.589	-62.6384	-83.4
163.588	-62.6382	-83
163.588	-62.6382	-82.2
163.588	-62.6379	-80
163.588	-62.6379	-79.6
163.587	-62.6375	-77.5
163.587	-62.6375	-77.1
163.587	-62.6372	-74.8
163.587	-62.6372	-75.3
163.586	-62.6369	-73.3
163.586	-62.6369	-72.6
163.586	-62.6367	-71.7
163.586	-62.6366	-70.8
163.585	-62.6363	-68
163.585	-62.6363	-68.4
163.585	-62.6362	-67.9
163.585	-62.636	-66.8
163.584	-62.636	-64.8
163.584	-62.6358	-64.1
163.584	-62.6357	-63.7
163.583	-62.6354	-62.1
163.583	-62.6354	-61.8
163.583	-62.6352	-60
163.583	-62.6351	-59.7
163.582	-62.6349	-57.3
163.582	-62.6348	-57.6
163.582	-62.6345	-56
163.582	-62.6345	-55.2
163.581	-62.6343	-54.3
163.581	-62.6342	-53.8
163.581	-62.6342	-53.1
163.581	-62.6339	-51.9
163.581	-62.6339	-51.8
163.58	-62.6335	-49.7
163.58	-62.6335	-49.2
163.58	-62.6333	-47.3
163.579	-62.6333	-48
163.579	-62.6332	-47.2
163.579	-62.633	-45.6
163.579	-62.6329	-46.1
163.578	-62.6327	-44.3
163.578	-62.6326	-43.7
163.578	-62.6323	-41.4
163.578	-62.6323	-41
163.578	-62.6322	-41.3
163.577	-62.632	-39.7
163.577	-62.6319	-39.4
163.577	-62.6317	-37.7
163.576	-62.6316	-37.4
163.576	-62.6313	-35.1
163.576	-62.6313	-35.1
163.575	-62.631	-33.4
163.575	-62.6309	-33.4
163.575	-62.6309	-33.2
163.575	-62.6307	-31.8
163.574	-62.6304	-28.9
163.574	-62.6303	-28.1
163.574	-62.6301	-27.1
163.574	-62.6301	-26.5
163.574	-62.63	-26.7
163.573	-62.6298	-25.1
163.573	-62.6298	-25.1
163.573	-62.6295	-22
163.573	-62.6294	-22
163.572	-62.6292	-19.8
163.572	-62.6292	-20
163.572	-62.6291	-19.7
163.572	-62.6289	-18
163.572	-62.6289	-17.7
163.571	-62.6286	-15.5
163.571	-62.6285	-15.8
163.571	-62.6283	-13.6
163.571	-62.6283	-14
163.57	-62.628	-12.3
163.57	-62.628	-11.1
163.57	-62.6279	-11.3
163.57	-62.6277	-9.3
163.569	-62.6273	-6.7
163.569	-62.6273	-5.8
163.568	-62.6271	-4.7
163.568	-62.627	-4.5
163.568	-62.627	-3.9
163.568	-62.6268	-2.5
163.568	-62.6267	-2
163.567	-62.6264	1.7
163.567	-62.6261	4.4
163.567	-62.6261	4.3
163.566	-62.6258	5.9
163.566	-62.6258	6
163.566	-62.6256	8.3
163.565	-62.6255	8.9
163.565	-62.6253	10.7
163.565	-62.6252	11.3
163.565	-62.6252	10.9
163.565	-62.6249	13.5
163.565	-62.6249	14.3
163.564	-62.6247	16.6
163.564	-62.6244	18.8
163.564	-62.6243	19.9
163.563	-62.6243	19.7
163.563	-62.624	21.4
163.563	-62.624	22.1
163.563	-62.6238	24.2
163.562	-62.6234	26.2
163.562	-62.6234	27.3
163.562	-62.6232	28.4
163.561	-62.6231	29.5
163.561	-62.6229	32.3
163.561	-62.6228	31.8
163.56	-62.6225	34.3
163.56	-62.6222	36.6
163.56	-62.6222	37.4
163.559	-62.6219	39.1
163.559	-62.6219	38.8
163.559	-62.6215	42.6
163.558	-62.6213	44.5
163.558	-62.6212	45.2
163.558	-62.6212	44.9
163.558	-62.6209	46.7
163.558	-62.6209	46.9
163.557	-62.6206	49.8
163.556	-62.6203	51.5
163.556	-62.6202	52
163.556	-62.62	54
163.556	-62.6199	53.4
163.555	-62.6196	55.9
163.555	-62.6193	57.8
163.555	-62.6192	58.2
163.554	-62.619	59.7
163.554	-62.6189	59.8
163.554	-62.6187	61.3
163.553	-62.6183	63.8
163.553	-62.6181	63.9
163.553	-62.6181	64.5
163.552	-62.618	64.9
163.552	-62.6178	65.7
163.552	-62.6177	66.3
163.552	-62.6174	67.5
163.551	-62.6173	68.3
163.551	-62.6171	68.1
163.551	-62.6171	69
163.55	-62.6168	69.6
163.55	-62.6168	70.8
163.55	-62.6167	70.5
163.55	-62.6164	70.6
163.549	-62.6161	72.5
163.549	-62.6161	73.4
163.549	-62.6158	74
163.548	-62.6158	73.2
163.548	-62.6157	73.7
163.548	-62.6155	74.5
163.547	-62.6151	75.3
163.547	-62.6148	75.6
163.547	-62.6148	75.6
163.546	-62.6146	76.5
163.546	-62.6145	76.9
163.546	-62.6142	76.6
163.545	-62.614	77.9
163.545	-62.6139	77.6
163.545	-62.6139	76.9
163.545	-62.6136	78.3
163.545	-62.6136	76.9
163.544	-62.6134	77.6
163.544	-62.613	77
163.543	-62.613	77.6
163.543	-62.6127	77.2
163.543	-62.6127	77
163.543	-62.6127	76.7
163.542	-62.6124	77.6
163.542	-62.6121	76
163.542	-62.6121	76.6
163.541	-62.6118	75.8
163.541	-62.6118	75.8
163.541	-62.6115	76
163.541	-62.6115	75.8
163.54	-62.6112	75
163.539	-62.6109	74.7
163.539	-62.6108	74.8
163.539	-62.6106	73.4
163.539	-62.6106	73.8
163.538	-62.6103	73.3
163.538	-62.6102	72.8
163.538	-62.61	72.4
163.538	-62.61	72.2
163.537	-62.6097	71
163.537	-62.6096	70.5
163.537	-62.6094	70.2
163.537	-62.6093	69.3
163.536	-62.6091	69.8
163.536	-62.609	69.8
163.536	-62.6088	67.9
163.536	-62.6087	68.2
163.535	-62.6085	67
163.535	-62.6081	65.7
163.534	-62.6081	65
163.534	-62.6078	63.3
163.534	-62.6078	63.2
163.533	-62.6076	62.7
163.533	-62.6075	62.1
163.533	-62.6072	60.2
163.532	-62.6069	58.9
163.532	-62.6066	58.3
163.532	-62.6066	57.5
163.532	-62.6065	57.3
163.531	-62.6063	55.2
163.531	-62.6062	55.3
163.531	-62.6059	53.9
163.531	-62.6059	52.9
163.53	-62.6056	52.2
163.53	-62.6056	51.4
163.53	-62.6053	50
163.529	-62.605	48.6
163.529	-62.6049	48.6
163.528	-62.6047	47.3
163.528	-62.6047	46.5
163.528	-62.6046	46.3
163.528	-62.6044	44.8
163.527	-62.604	43.6
163.527	-62.6038	41.9
163.527	-62.6037	41.8
163.527	-62.6037	40.5
163.526	-62.6034	39.3
163.526	-62.6034	40.2
163.526	-62.6031	37.3
163.525	-62.6029	35.7
163.525	-62.6028	35.6
163.525	-62.6028	35.2
163.525	-62.6026	34.1
163.525	-62.6025	33.7
163.524	-62.6025	33.6
163.524	-62.6023	32.7
163.523	-62.6019	30.4
163.523	-62.6019	30
163.523	-62.6017	27.6
163.523	-62.6016	27.2
163.523	-62.6016	27.4
163.522	-62.6013	26.4
163.522	-62.601	24.3
163.522	-62.601	24.3
163.521	-62.6007	22.1
163.521	-62.6007	21.2
163.521	-62.6005	20.3
163.521	-62.6004	19.4
163.52	-62.6001	18.1
163.52	-62.5998	16.1
163.519	-62.5997	15
163.519	-62.5995	13.8
163.519	-62.5994	13.9
163.519	-62.5992	12
163.518	-62.5991	11.2
163.518	-62.5988	9.3
163.517	-62.5986	7.2
163.517	-62.5985	6.8
163.517	-62.5985	6.9
163.517	-62.5982	5.5
163.517	-62.5981	5.1
163.516	-62.5979	2.9
163.516	-62.5979	2.7
163.516	-62.5976	1.4
163.516	-62.5976	1.1
163.516	-62.5975	0.1
163.515	-62.5973	-1.5
163.514	-62.597	-4.1
163.514	-62.5969	-4.4
163.514	-62.5967	-6.1
163.514	-62.5966	-5.8
163.514	-62.5966	-6.8
163.513	-62.5964	-8.9
163.513	-62.5963	-8.3
163.513	-62.5961	-10.6
163.513	-62.596	-10.7
163.512	-62.5957	-12.7
163.512	-62.5957	-13.3
163.512	-62.5954	-15.2
163.512	-62.5954	-15.5
163.511	-62.5951	-17.9
163.511	-62.595	-17.9
163.51	-62.5948	-20.6
163.51	-62.5947	-20.2
163.51	-62.5945	-22.5
163.51	-62.5944	-22.4
163.509	-62.5942	-24.7
163.509	-62.5938	-27.2
163.509	-62.5938	-27.7
163.508	-62.5936	-28.9
163.508	-62.5935	-29.7
163.508	-62.5932	-32.1
163.508	-62.5932	-31.4
163.507	-62.5929	-34.1
163.507	-62.5929	-34.3
163.507	-62.5926	-36.3
163.506	-62.5926	-36.3
163.506	-62.5924	-38.9
163.506	-62.5923	-38.6
163.506	-62.5921	-40.9
163.505	-62.592	-41.9
163.505	-62.5917	-43.2
163.505	-62.5917	-43.2
163.505	-62.5916	-44.3
163.504	-62.5915	-45.9
163.504	-62.5914	-46
163.504	-62.5914	-46.1
163.504	-62.5911	-48.4
163.504	-62.591	-48.9
163.503	-62.5908	-51.4
163.503	-62.5907	-51.3
163.503	-62.5905	-53.6
163.503	-62.5904	-52.9
163.503	-62.5904	-53.2
163.502	-62.5901	-54.9
163.502	-62.59	-55.5
163.502	-62.5898	-58.6
163.502	-62.5897	-57.8
163.501	-62.5895	-60.8
163.501	-62.5894	-60.2
163.501	-62.5891	-62.3
163.5	-62.5888	-65.4
163.5	-62.5886	-67.6
163.499	-62.5885	-67.3
163.499	-62.5885	-68.1
163.499	-62.5882	-69.4
163.499	-62.5882	-70.4
163.498	-62.5879	-71.8
163.498	-62.5878	-72.4
163.498	-62.5876	-73.8
163.498	-62.5875	-74
163.498	-62.5875	-75
163.497	-62.5872	-76.1
163.497	-62.5872	-76.3
163.497	-62.587	-77.9
163.496	-62.5869	-78.2
163.496	-62.5866	-79.7
163.496	-62.5866	-79.5
163.496	-62.5863	-81.9
163.495	-62.5863	-82.1
163.495	-62.5862	-82.1
163.495	-62.586	-83.5
163.494	-62.5856	-84.7
163.494	-62.5853	-86.6
163.494	-62.5853	-86.6
163.493	-62.585	-89.1
163.493	-62.585	-88.7
163.493	-62.5846	-90.2
163.492	-62.5844	-91.3
163.492	-62.5843	-91.5
163.492	-62.5841	-92.9
163.491	-62.584	-92.9
163.491	-62.5837	-94.5
163.49	-62.5834	-96.1
163.49	-62.5834	-96.4
163.49	-62.5831	-97.2
163.49	-62.5831	-96.9
163.489	-62.5829	-97.3
163.489	-62.5828	-99
163.489	-62.5826	-100
163.489	-62.5825	-100
163.488	-62.5823	-100.5
163.488	-62.5822	-100.3
163.488	-62.582	-102
163.488	-62.5819	-102.3
163.487	-62.5816	-102.8
163.487	-62.5815	-103.5
163.487	-62.5813	-104.5
163.487	-62.5813	-104.1
163.487	-62.5812	-104.4
163.486	-62.5809	-105.8
163.486	-62.5807	-106.1
163.485	-62.5806	-105.8
163.485	-62.5803	-107.7
163.484	-62.5801	-108.2
163.484	-62.58	-108.9
163.484	-62.5798	-109.6
163.484	-62.5797	-109.3
163.483	-62.5795	-109.9
163.483	-62.5794	-110.2
163.483	-62.5792	-111.9
163.483	-62.5791	-112.4
163.483	-62.5791	-112.3
163.482	-62.5789	-111.9
163.482	-62.5786	-114.2
163.481	-62.5783	-113.9
163.481	-62.5782	-115.2
163.481	-62.578	-114.8
163.481	-62.578	-114.9
163.48	-62.5776	-115.5
163.479	-62.5774	-116.6
163.479	-62.5773	-116.8
163.479	-62.5773	-116.9
163.479	-62.5771	-117.7
163.479	-62.577	-117.8
163.478	-62.5767	-118.5
163.478	-62.5766	-118.9
163.478	-62.5764	-118.7
163.478	-62.5763	-119
163.478	-62.5763	-119.1
163.477	-62.5761	-120.2
163.477	-62.5761	-119.9
163.477	-62.576	-120.2
163.477	-62.5757	-121.4
163.476	-62.5754	-121.7
163.476	-62.5754	-121.5
163.476	-62.5751	-122.8
163.475	-62.5751	-123.3
163.475	-62.575	-123.7
163.475	-62.5748	-124.4
163.474	-62.5745	-124.7
163.474	-62.5744	-124.8
163.474	-62.5742	-126.1
163.474	-62.5742	-126.4
163.474	-62.5741	-126.8
163.473	-62.5739	-126.9
163.473	-62.5736	-128.3
163.473	-62.5735	-128.7
163.472	-62.5733	-129.3
163.472	-62.5733	-129.1
163.472	-62.573	-130.4
163.472	-62.573	-131
163.471	-62.5727	-131.2
163.471	-62.5724	-132.5
163.471	-62.5724	-132.6
163.47	-62.5722	-133.7
163.47	-62.5721	-134.3
163.47	-62.5721	-134.3
163.47	-62.5718	-135.2
163.469	-62.5715	-136.6
163.469	-62.5714	-136.1
163.468	-62.5712	-137.1
163.468	-62.5712	-137.4
163.468	-62.5709	-138.2
163.467	-62.5706	-140.1
163.467	-62.5703	-141
163.467	-62.5703	-141.2
163.466	-62.57	-142.7
163.466	-62.5699	-142
163.466	-62.5697	-142.8
163.466	-62.5696	-143.5
163.465	-62.5693	-144.4
163.465	-62.5693	-145.1
163.465	-62.569	-145.9
163.464	-62.569	-145.4
163.464	-62.5687	-147.4
163.464	-62.5686	-147.3
163.463	-62.5684	-148.2
163.463	-62.5684	-148.6
163.463	-62.5681	-148.9
163.463	-62.568	-149.9
163.462	-62.5678	-150.5
163.462	-62.5674	-151.8
163.461	-62.5672	-153.3
163.461	-62.5671	-153.7
163.461	-62.5668	-154.6
163.46	-62.5665	-155.8
163.46	-62.5663	-157.4
163.46	-62.5662	-157.5
163.459	-62.5662	-157.9
163.459	-62.5659	-158.9
163.459	-62.5659	-158.8
163.458	-62.5656	-160.7
163.458	-62.5654	-162.3
163.458	-62.5654	-161.9
163.458	-62.5653	-162.1
163.457	-62.5651	-163.3
163.457	-62.565	-163.9
163.457	-62.5648	-164.6
163.457	-62.5647	-165.2
163.456	-62.5645	-166.5
163.456	-62.5644	-166.8
163.456	-62.5642	-168.1
163.455	-62.5639	-170
163.455	-62.5635	-171
163.455	-62.5635	-171.4
163.454	-62.5632	-172
163.454	-62.5632	-172.8
163.454	-62.5629	-173.6
163.453	-62.5626	-174.6
163.452	-62.5623	-176
163.452	-62.5622	-175.9
163.452	-62.562	-177.1
163.452	-62.562	-177.5
163.451	-62.5616	-177.5
163.451	-62.5614	-179.6
163.451	-62.5613	-180.6
163.45	-62.5611	-181.1
163.45	-62.561	-179.7
163.45	-62.5608	-182.4
163.449	-62.5604	-183.9
163.449	-62.5604	-183.9
163.449	-62.5602	-183.8
163.449	-62.5601	-184.7
163.448	-62.5598	-185.7
163.447	-62.5595	-187.3
163.447	-62.5592	-188
163.447	-62.5592	-188.3
163.446	-62.5589	-189.3
163.446	-62.5589	-189.5
163.446	-62.5585	-191.1
163.445	-62.5582	-192.9
163.445	-62.5582	-192.2
163.445	-62.5579	-194.6
163.445	-62.5579	-194.7
163.444	-62.5577	-195.5
163.444	-62.5576	-195.7
163.444	-62.5573	-197.5
163.443	-62.5573	-197
163.443	-62.557	-198.6
163.443	-62.557	-198.7
163.443	-62.5569	-198.5
163.442	-62.5567	-200.4
163.442	-62.5566	-201.1
163.442	-62.5563	-201.3
163.442	-62.5563	-201.9
163.441	-62.556	-202.6
163.441	-62.556	-202.7
163.441	-62.5558	-203.9
163.441	-62.5557	-204.1
163.44	-62.5554	-205.9
163.44	-62.5552	-206.1
163.44	-62.5551	-206.9
163.44	-62.5551	-207
163.439	-62.5548	-207.7
163.439	-62.5548	-207.9
163.438	-62.5545	-209.7
163.438	-62.5542	-211
163.437	-62.5539	-211
163.437	-62.5538	-211.3
163.436	-62.5532	-213.6
163.436	-62.5532	-213.9
163.436	-62.553	-213.8
163.436	-62.5529	-214.4
163.436	-62.5529	-214.6
163.435	-62.5526	-215.7
163.435	-62.5523	-216.6
163.435	-62.5522	-216.2
163.434	-62.552	-217.3
163.434	-62.552	-217.3
163.433	-62.5517	-217.8
163.433	-62.5514	-218.4
163.432	-62.5511	-219.6
163.432	-62.5511	-219.2
163.432	-62.5508	-220.5
163.431	-62.5506	-221
163.431	-62.5505	-222
163.431	-62.5502	-222.2
163.431	-62.5502	-222.4
163.43	-62.5499	-222.7
163.43	-62.5498	-223.1
163.43	-62.5498	-223.3
163.43	-62.5495	-223.4
163.429	-62.5492	-224.2
163.429	-62.5491	-224.5
163.428	-62.5489	-224.2
163.428	-62.5489	-224.1
163.428	-62.5486	-224.9
163.427	-62.5482	-225.1
163.427	-62.5482	-225.6
163.427	-62.5479	-225.6
163.427	-62.5479	-225.3
163.426	-62.5476	-225.8
163.426	-62.5472	-225.9
163.425	-62.547	-225.8
163.425	-62.5469	-225.8
163.425	-62.5467	-226.4
163.424	-62.5466	-225.4
163.424	-62.5464	-226.2
163.424	-62.5463	-225.4
163.423	-62.546	-226.3
163.423	-62.5457	-226.1
163.423	-62.5457	-226.3
163.422	-62.5455	-224.6
163.422	-62.5451	-225.8
163.422	-62.5451	-225
163.421	-62.5448	-224.7
163.421	-62.5448	-224.9
163.421	-62.5445	-224.1
163.421	-62.5445	-223.5
163.42	-62.5442	-223.9
163.42	-62.5439	-223.1
163.419	-62.5438	-223.7
163.419	-62.5436	-222.8
163.419	-62.5436	-222.7
163.418	-62.5432	-222.7
163.418	-62.5429	-221.4
163.417	-62.5427	-221.4
163.417	-62.5426	-221.3
163.417	-62.5424	-220.7
163.416	-62.542	-219.8
163.416	-62.542	-219.8
163.416	-62.5417	-219
163.416	-62.5416	-219.2
163.415	-62.5415	-218.5
163.415	-62.5414	-218.5
163.415	-62.5411	-218.1
163.414	-62.5408	-216.1
163.414	-62.5407	-216.1
163.414	-62.5405	-215.5
163.413	-62.5404	-214.8
163.413	-62.5401	-214.1
163.412	-62.5399	-213.2
163.412	-62.5399	-212.9
163.412	-62.5398	-212.8
163.412	-62.5396	-212.3
163.412	-62.5395	-212
163.411	-62.5392	-210.4
163.411	-62.5389	-209.4
163.41	-62.5387	-208.3
163.41	-62.5386	-208.8
163.41	-62.5386	-208.3
163.41	-62.5383	-207.5
163.409	-62.538	-205.2
163.409	-62.5379	-205.1
163.408	-62.5377	-204.7
163.408	-62.5376	-203.9
163.408	-62.5376	-203.9
163.408	-62.5374	-203.3
163.407	-62.537	-201.6
163.407	-62.5368	-200.8
163.407	-62.5367	-200
163.407	-62.5367	-199.9
163.406	-62.5364	-199.3
163.406	-62.5361	-196.6
163.405	-62.5358	-195.6
163.405	-62.5357	-195.3
163.405	-62.5354	-193.2
163.404	-62.5354	-194.1
163.404	-62.5351	-192.7
163.404	-62.5351	-192
163.403	-62.5348	-190.3
163.403	-62.5348	-190.2
163.403	-62.5345	-189.4
163.403	-62.5345	-189.1
163.403	-62.5345	-188.9
[truncated: 13,140 more rows]

## Sheet: Line2
Longitude	Latitude	Mag Anomaly (nT)
161.803	-62.1824	398
161.803	-62.1824	398
161.803	-62.1824	398
161.803	-62.1824	398
161.802	-62.1824	398
161.802	-62.1823	398
161.802	-62.1823	398
161.802	-62.1823	399
161.802	-62.1823	400
161.802	-62.1822	399
161.801	-62.1822	399
161.801	-62.1821	400
161.801	-62.1821	401
161.801	-62.182	401
161.801	-62.182	400
161.8	-62.1819	402
161.8	-62.1819	402
161.8	-62.1819	402
161.8	-62.1817	403
161.8	-62.1816	403
161.8	-62.1816	404
161.799	-62.1814	405
161.799	-62.1814	406
161.799	-62.1814	406
161.799	-62.1812	408
161.799	-62.1812	409
161.799	-62.1811	409
161.798	-62.1809	410
161.798	-62.1809	411
161.798	-62.1808	411
161.798	-62.1807	413
161.798	-62.1806	414
161.798	-62.1805	414
161.798	-62.1805	415
161.798	-62.1803	418
161.797	-62.1803	418
161.797	-62.1803	418
161.797	-62.1801	421
161.797	-62.18	421
161.797	-62.18	422
161.797	-62.1799	422
161.797	-62.1798	425
161.797	-62.1797	424
161.797	-62.1797	426
161.796	-62.1795	427
161.796	-62.1794	429
161.796	-62.1794	429
161.796	-62.1793	430
161.796	-62.1792	432
161.796	-62.1792	432
161.796	-62.1791	433
161.796	-62.1791	434
161.795	-62.179	434
161.795	-62.1789	436
161.795	-62.1789	436
161.795	-62.1788	438
161.795	-62.1786	439
161.795	-62.1786	439
161.795	-62.1785	440
161.795	-62.1785	442
161.794	-62.1784	442
161.794	-62.1783	444
161.794	-62.1783	445
161.794	-62.1781	447
161.794	-62.1781	447
161.794	-62.178	447
161.794	-62.1779	448
161.794	-62.1778	449
161.793	-62.1778	451
161.793	-62.1777	451
161.793	-62.1777	451
161.793	-62.1775	455
161.793	-62.1774	456
161.793	-62.1772	457
161.793	-62.1771	458
161.792	-62.1771	458
161.792	-62.177	458
161.792	-62.177	460
161.792	-62.1769	460
161.792	-62.1769	460
161.792	-62.1767	462
161.792	-62.1767	463
161.792	-62.1765	464
161.792	-62.1765	465
161.792	-62.1764	465
161.791	-62.1763	467
161.791	-62.1762	468
161.791	-62.1762	467
161.791	-62.1761	468
161.791	-62.1761	469
161.791	-62.1759	470
161.791	-62.1759	470
161.791	-62.1758	471
161.79	-62.1756	473
161.79	-62.1755	474
161.79	-62.1754	474
161.79	-62.1753	478
161.79	-62.1753	477
161.79	-62.1752	477
161.79	-62.1752	477
161.79	-62.1751	477
161.79	-62.175	478
161.789	-62.175	479
161.789	-62.1749	478
161.789	-62.1748	479
161.789	-62.1747	481
161.789	-62.1746	482
161.789	-62.1745	483
161.789	-62.1745	484
161.789	-62.1743	484
161.789	-62.1743	484
161.788	-62.1742	485
161.788	-62.174	486
161.788	-62.1739	487
161.788	-62.1739	487
161.788	-62.1738	487
161.788	-62.1737	489
161.787	-62.1736	489
161.787	-62.1736	490
161.787	-62.1734	491
161.787	-62.1734	491
161.787	-62.1733	492
161.787	-62.1732	492
161.787	-62.1732	493
161.786	-62.1731	492
161.786	-62.1731	493
161.786	-62.1731	493
161.786	-62.173	494
161.786	-62.173	494
161.786	-62.1729	494
161.786	-62.1728	495
161.785	-62.1726	496
161.785	-62.1726	496
161.785	-62.1726	497
161.785	-62.1725	498
161.785	-62.1724	497
161.785	-62.1724	499
161.785	-62.1724	501
161.784	-62.1723	498
161.784	-62.1722	500
161.784	-62.1722	500
161.784	-62.1721	498
161.784	-62.172	500
161.783	-62.1719	500
161.783	-62.1718	501
161.783	-62.1718	501
161.783	-62.1717	500
161.783	-62.1716	500
161.783	-62.1716	501
161.782	-62.1714	500
161.782	-62.1714	500
161.782	-62.1714	501
161.782	-62.1713	501
161.782	-62.1712	501
161.782	-62.1711	502
161.782	-62.1711	500
161.781	-62.171	501
161.781	-62.1709	501
161.781	-62.1709	501
161.781	-62.1708	501
161.781	-62.1707	501
161.781	-62.1706	501
161.781	-62.1706	502
161.78	-62.1705	501
161.78	-62.1704	501
161.78	-62.1704	501
161.78	-62.1703	500
161.78	-62.1702	500
161.779	-62.1701	500
161.779	-62.17	500
161.779	-62.17	500
161.779	-62.1698	500
161.779	-62.1698	500
161.779	-62.1697	499
161.779	-62.1697	499
161.779	-62.1695	499
161.778	-62.1695	499
161.778	-62.1694	498
161.778	-62.1692	499
161.778	-62.1692	498
161.778	-62.1691	498
161.778	-62.1689	498
161.777	-62.1689	497
161.777	-62.1688	497
161.777	-62.1688	497
161.777	-62.1688	497
161.777	-62.1686	496
161.777	-62.1686	497
161.777	-62.1685	496
161.777	-62.1683	495
161.776	-62.1682	495
161.776	-62.1682	495
161.776	-62.1681	494
161.776	-62.168	494
161.776	-62.168	494
161.776	-62.1679	493
161.775	-62.1677	492
161.775	-62.1677	492
161.775	-62.1675	491
161.775	-62.1675	490
161.775	-62.1674	491
161.775	-62.1673	490
161.775	-62.1673	490
161.774	-62.1671	489
161.774	-62.1671	489
161.774	-62.167	488
161.774	-62.1668	486
161.774	-62.1668	486
161.774	-62.1667	486
161.773	-62.1666	486
161.773	-62.1665	485
161.773	-62.1664	485
161.773	-62.1664	485
161.773	-62.1662	483
161.773	-62.1662	483
161.773	-62.1661	482
161.772	-62.166	482
161.772	-62.1659	481
161.772	-62.1659	480
161.772	-62.1658	480
161.772	-62.1658	480
161.772	-62.1657	478
161.772	-62.1656	479
161.772	-62.1655	477
161.771	-62.1654	476
161.771	-62.1653	476
161.771	-62.1652	475
161.771	-62.1652	474
161.771	-62.1651	475
161.771	-62.165	472
161.771	-62.165	473
161.771	-62.1649	472
161.77	-62.1647	470
161.77	-62.1647	471
161.77	-62.1646	470
161.77	-62.1645	469
161.77	-62.1644	467
161.77	-62.1643	466
161.769	-62.1641	465
161.769	-62.1641	465
161.769	-62.164	465
161.769	-62.1639	463
161.769	-62.1638	463
161.769	-62.1638	462
161.769	-62.1637	461
161.769	-62.1637	461
161.768	-62.1635	459
161.768	-62.1634	458
161.768	-62.1634	459
161.768	-62.1632	457
161.768	-62.1632	457
161.768	-62.1631	456
161.767	-62.163	454
161.767	-62.1629	454
161.767	-62.1629	454
161.767	-62.1628	454
161.767	-62.1627	452
161.767	-62.1626	451
161.767	-62.1625	451
161.766	-62.1623	449
161.766	-62.1623	448
161.766	-62.1621	447
161.766	-62.162	446
161.766	-62.162	446
161.766	-62.1619	446
161.766	-62.1619	446
161.766	-62.1618	443
161.765	-62.1617	444
161.765	-62.1616	442
161.765	-62.1615	441
161.765	-62.1614	440
161.765	-62.1613	440
161.765	-62.1612	438
161.765	-62.1611	439
161.764	-62.1611	437
161.764	-62.161	437
161.764	-62.1609	435
161.764	-62.1608	435
161.764	-62.1608	434
161.764	-62.1607	434
161.764	-62.1606	433
161.763	-62.1605	431
161.763	-62.1604	432
161.763	-62.1604	431
161.763	-62.1602	429
161.763	-62.1602	429
161.763	-62.1601	429
161.763	-62.1599	427
161.763	-62.1599	427
161.763	-62.1598	427
161.762	-62.1598	426
161.762	-62.1596	424
161.762	-62.1596	424
161.762	-62.1595	423
161.762	-62.1595	423
161.762	-62.1593	422
161.762	-62.1592	421
161.761	-62.1592	420
161.761	-62.1591	419
161.761	-62.159	420
161.761	-62.159	419
161.761	-62.1589	419
161.761	-62.1589	418
161.761	-62.1587	416
161.761	-62.1587	417
161.761	-62.1586	416
161.76	-62.1585	415
161.76	-62.1584	414
161.76	-62.1583	413
161.76	-62.1583	413
161.76	-62.1581	412
161.76	-62.1581	412
161.76	-62.158	411
161.76	-62.158	411
161.759	-62.1579	411
161.759	-62.1578	410
161.759	-62.1578	409
161.759	-62.1577	409
161.759	-62.1575	407
161.759	-62.1574	407
161.759	-62.1574	407
161.758	-62.1574	407
161.758	-62.1572	406
161.758	-62.1572	406
161.758	-62.1571	404
161.758	-62.157	403
161.758	-62.1569	403
161.758	-62.1569	403
161.758	-62.1568	402
161.757	-62.1566	401
161.757	-62.1566	401
161.757	-62.1565	400
161.757	-62.1563	399
161.757	-62.1563	398
161.757	-62.1562	398
161.756	-62.1561	397
161.756	-62.156	397
161.756	-62.156	397
161.756	-62.1558	396
161.756	-62.1557	396
161.756	-62.1557	395
161.756	-62.1556	395
161.755	-62.1554	393
161.755	-62.1554	392
161.755	-62.1553	392
161.755	-62.1551	393
161.755	-62.1551	392
161.755	-62.1551	391
161.755	-62.155	391
161.755	-62.1549	390
161.755	-62.1548	390
161.754	-62.1547	389
161.754	-62.1546	389
161.754	-62.1545	388
161.754	-62.1545	388
161.754	-62.1544	387
161.754	-62.1543	387
161.754	-62.1542	387
161.754	-62.1542	387
161.753	-62.1541	387
161.753	-62.1541	386
161.753	-62.154	386
161.753	-62.154	386
161.753	-62.1539	385
161.753	-62.1538	385
161.753	-62.1537	384
161.753	-62.1536	383
161.752	-62.1535	383
161.752	-62.1535	383
161.752	-62.1534	383
161.752	-62.1533	383
161.752	-62.1533	382
161.752	-62.1531	382
161.752	-62.153	382
161.752	-62.153	382
161.751	-62.1529	382
161.751	-62.1528	381
161.751	-62.1528	381
161.751	-62.1527	379
161.751	-62.1526	379
161.751	-62.1524	379
161.751	-62.1524	379
161.75	-62.1523	380
161.75	-62.1521	378
161.75	-62.1521	378
161.75	-62.1521	378
161.75	-62.152	378
161.75	-62.1519	377
161.75	-62.1518	376
161.75	-62.1517	378
161.749	-62.1517	378
161.749	-62.1515	376
161.749	-62.1515	376
161.749	-62.1514	376
161.749	-62.1513	376
161.749	-62.1512	376
161.749	-62.1512	376
161.749	-62.1511	375
161.748	-62.151	376
161.748	-62.1509	375
161.748	-62.1508	375
161.748	-62.1507	375
161.748	-62.1506	374
161.748	-62.1506	375
161.748	-62.1505	374
161.747	-62.1504	375
161.747	-62.1503	375
161.747	-62.1503	375
161.747	-62.1501	374
161.747	-62.1501	374
161.747	-62.15	375
161.747	-62.1499	374
161.746	-62.1498	374
161.746	-62.1497	375
161.746	-62.1497	375
161.746	-62.1495	374
161.746	-62.1494	374
161.746	-62.1494	374
161.746	-62.1493	374
161.746	-62.1492	375
161.745	-62.1492	374
161.745	-62.1491	374
161.745	-62.1489	375
161.745	-62.1488	375
161.745	-62.1487	375
161.745	-62.1486	375
161.744	-62.1485	375
161.744	-62.1485	375
161.744	-62.1483	375
161.744	-62.1483	375
161.744	-62.1482	376
161.744	-62.1482	376
161.744	-62.148	376
161.744	-62.148	375
161.743	-62.1479	376
161.743	-62.1478	376
161.743	-62.1476	377
161.743	-62.1476	377
161.743	-62.1476	377
161.743	-62.1474	378
161.743	-62.1474	378
161.743	-62.1473	378
161.742	-62.1472	379
161.742	-62.1471	378
161.742	-62.1471	378
161.742	-62.147	379
161.742	-62.1468	380
161.742	-62.1467	380
161.741	-62.1466	381
161.741	-62.1465	381
161.741	-62.1465	381
161.741	-62.1464	382
161.741	-62.1462	382
161.741	-62.1462	382
161.741	-62.1461	382
161.74	-62.146	383
161.74	-62.1459	383
161.74	-62.1458	384
161.74	-62.1458	383
161.74	-62.1456	385
161.74	-62.1455	385
161.74	-62.1455	386
161.739	-62.1453	385
161.739	-62.1453	386
161.739	-62.1452	386
161.739	-62.1452	386
161.739	-62.1452	387
161.739	-62.145	388
161.739	-62.145	387
161.739	-62.1449	388
161.739	-62.1448	388
161.738	-62.1446	390
161.738	-62.1446	390
161.738	-62.1446	390
161.738	-62.1444	391
161.738	-62.1443	392
161.738	-62.1443	391
161.738	-62.1442	391
161.737	-62.1441	393
161.737	-62.144	393
161.737	-62.1439	394
161.737	-62.1438	394
161.737	-62.1437	394
161.737	-62.1437	395
161.737	-62.1436	395
161.736	-62.1435	395
161.736	-62.1434	395
161.736	-62.1434	396
161.736	-62.1433	396
161.736	-62.1433	398
161.736	-62.1432	397
161.736	-62.1431	397
161.736	-62.1431	398
161.736	-62.143	398
161.735	-62.1429	399
161.735	-62.1428	401
161.735	-62.1427	400
161.735	-62.1425	401
161.735	-62.1425	401
161.735	-62.1425	401
161.734	-62.1423	403
161.734	-62.1422	402
161.734	-62.1422	403
161.734	-62.1421	404
161.734	-62.142	403
161.734	-62.1419	404
161.734	-62.1418	404
161.734	-62.1418	405
161.733	-62.1416	406
161.733	-62.1416	405
161.733	-62.1413	407
161.733	-62.1413	407
161.733	-62.1412	408
161.733	-62.1412	408
161.733	-62.141	408
161.732	-62.141	408
161.732	-62.1409	410
161.732	-62.1409	410
161.732	-62.1407	411
161.732	-62.1406	411
161.732	-62.1406	410
161.732	-62.1404	412
161.732	-62.1404	411
161.731	-62.1403	411
161.731	-62.1403	411
161.731	-62.1403	412
161.731	-62.1402	410
161.731	-62.1401	412
161.731	-62.1401	411
161.731	-62.1398	413
161.731	-62.1397	412
161.731	-62.1397	412
161.73	-62.1397	413
161.73	-62.1395	413
161.73	-62.1395	413
161.73	-62.1394	412
161.73	-62.1393	413
161.73	-62.1392	413
161.73	-62.1392	414
161.73	-62.1391	414
161.729	-62.139	415
161.729	-62.1389	413
161.729	-62.1388	414
161.729	-62.1388	414
161.729	-62.1386	415
161.729	-62.1385	414
161.729	-62.1385	413
161.728	-62.1383	413
161.728	-62.1383	413
161.728	-62.1382	414
161.728	-62.1382	413
161.728	-62.138	413
161.728	-62.138	413
161.728	-62.1379	413
161.727	-62.1379	412
161.727	-62.1377	411
161.727	-62.1376	411
161.727	-62.1376	413
161.727	-62.1374	411
161.727	-62.1374	411
161.727	-62.1373	412
161.727	-62.1373	412
161.726	-62.1373	410
161.726	-62.1371	410
161.726	-62.1371	409
161.726	-62.137	409
161.726	-62.1369	409
161.726	-62.1368	409
161.726	-62.1367	408
161.726	-62.1367	408
161.726	-62.1366	407
161.725	-62.1365	406
161.725	-62.1365	406
161.725	-62.1364	405
161.725	-62.1364	404
161.725	-62.1363	405
161.725	-62.1362	403
161.725	-62.1361	404
161.725	-62.136	403
161.724	-62.1359	402
161.724	-62.1358	401
161.724	-62.1357	399
161.724	-62.1356	398
161.724	-62.1355	398
161.724	-62.1355	397
161.723	-62.1352	395
161.723	-62.1352	394
161.723	-62.1351	393
161.723	-62.135	392
161.723	-62.1349	390
161.723	-62.1348	389
161.722	-62.1346	388
161.722	-62.1346	387
161.722	-62.1345	386
161.722	-62.1344	384
161.722	-62.1343	383
161.722	-62.1343	382
161.722	-62.1342	383
161.721	-62.1341	379
161.721	-62.134	379
161.721	-62.1339	378
161.721	-62.1339	376
161.721	-62.1338	375
161.721	-62.1337	374
161.721	-62.1337	373
161.721	-62.1336	373
161.72	-62.1334	369
161.72	-62.1334	367
161.72	-62.1334	367
161.72	-62.1333	367
161.72	-62.1332	364
161.72	-62.1331	364
161.72	-62.133	361
161.72	-62.133	360
161.719	-62.1329	358
161.719	-62.1328	357
161.719	-62.1328	355
161.719	-62.1327	354
161.719	-62.1326	352
161.719	-62.1325	352
161.719	-62.1325	351
161.718	-62.1323	346
161.718	-62.1322	345
161.718	-62.1322	343
161.718	-62.1321	343
161.718	-62.132	340
161.718	-62.1319	337
161.718	-62.1318	335
161.717	-62.1317	334
161.717	-62.1316	332
161.717	-62.1316	331
161.717	-62.1314	326
161.717	-62.1314	326
161.717	-62.1313	324
161.717	-62.1312	323
161.717	-62.1311	319
161.716	-62.131	318
161.716	-62.131	317
161.716	-62.1308	311
161.716	-62.1307	310
161.716	-62.1307	309
161.716	-62.1305	305
161.716	-62.1305	304
161.716	-62.1304	303
161.715	-62.1303	298
161.715	-62.1302	296
161.715	-62.1301	294
161.715	-62.1301	293
161.715	-62.1299	288
161.715	-62.1299	287
161.715	-62.1298	286
161.714	-62.1297	282
161.714	-62.1296	281
161.714	-62.1296	279
161.714	-62.1296	277
161.714	-62.1295	276
161.714	-62.1294	274
161.714	-62.1294	272
161.714	-62.1293	271
161.714	-62.1292	269
161.713	-62.1291	265
161.713	-62.129	263
161.713	-62.129	261
161.713	-62.1289	260
161.713	-62.1288	254
161.713	-62.1287	254
161.713	-62.1287	253
161.712	-62.1285	248
161.712	-62.1285	246
161.712	-62.1284	245
161.712	-62.1283	242
161.712	-62.1282	237
161.712	-62.1281	234
161.712	-62.1281	234
161.711	-62.1279	228
161.711	-62.1278	225
161.711	-62.1278	224
161.711	-62.1276	218
161.711	-62.1275	217
161.711	-62.1275	215
161.711	-62.1275	214
161.71	-62.1273	208
161.71	-62.1272	206
161.71	-62.1271	204
161.71	-62.127	197
161.71	-62.1269	196
161.71	-62.1269	195
161.709	-62.1267	190
161.709	-62.1267	189
161.709	-62.1266	187
161.709	-62.1266	186
161.709	-62.1265	184
161.709	-62.1264	179
161.709	-62.1263	178
161.709	-62.1262	175
161.708	-62.1261	170
161.708	-62.126	167
161.708	-62.126	165
161.708	-62.1259	164
161.708	-62.1258	159
161.708	-62.1257	157
161.708	-62.1257	157
161.708	-62.1257	154
161.707	-62.1255	148
161.707	-62.1254	147
161.707	-62.1253	143
161.707	-62.1252	138
161.707	-62.1251	135
161.707	-62.1251	134
161.707	-62.125	133
161.707	-62.1249	127
161.706	-62.1249	125
161.706	-62.1248	124
161.706	-62.1246	118
161.706	-62.1246	116
161.706	-62.1245	115
161.706	-62.1244	111
161.706	-62.1243	106
161.705	-62.1242	104
161.705	-62.1242	101
161.705	-62.124	96
161.705	-62.1239	93
161.705	-62.1239	91
161.705	-62.1237	84
161.705	-62.1237	82
161.704	-62.1236	82
161.704	-62.1236	80
161.704	-62.1234	75
161.704	-62.1234	73
161.704	-62.1233	69
161.704	-62.1232	68
161.704	-62.1231	62
161.704	-62.123	60
161.703	-62.123	58
161.703	-62.1228	53
161.703	-62.1228	51
161.703	-62.1227	49
161.703	-62.1227	49
161.703	-62.1226	47
161.703	-62.1225	41
161.703	-62.1225	39
161.703	-62.1224	36
161.702	-62.1222	31
161.702	-62.1221	28
161.702	-62.1221	26
161.702	-62.1221	24
161.702	-62.1219	19
161.702	-62.1219	17
161.702	-62.1218	15
161.702	-62.1218	13
161.702	-62.1218	12
161.701	-62.1217	9
161.701	-62.1216	8
161.701	-62.1216	6
161.701	-62.1215	1
161.701	-62.1213	-4
161.701	-62.1212	-8
161.701	-62.1212	-8
161.7	-62.121	-15
161.7	-62.121	-18
161.7	-62.1209	-18
161.7	-62.1207	-28
161.7	-62.1206	-29
161.7	-62.1205	-33
161.699	-62.1204	-38
161.699	-62.1203	-41
161.699	-62.1203	-43
161.699	-62.1201	-50
161.699	-62.12	-52
161.699	-62.12	-54
161.699	-62.1199	-59
161.699	-62.1198	-60
161.698	-62.1198	-62
161.698	-62.1197	-64
161.698	-62.1197	-66
161.698	-62.1195	-72
161.698	-62.1195	-73
161.698	-62.1194	-76
161.698	-62.1194	-78
161.698	-62.1192	-84
161.697	-62.1191	-87
161.697	-62.1191	-89
161.697	-62.1189	-93
161.697	-62.1189	-95
161.697	-62.1189	-98
161.697	-62.1188	-98
161.697	-62.1188	-100
161.697	-62.1186	-106
161.697	-62.1186	-107
161.696	-62.1185	-110
161.696	-62.1183	-116
161.696	-62.1183	-118
161.696	-62.1182	-120
161.696	-62.1182	-122
161.696	-62.118	-127
161.696	-62.118	-129
161.696	-62.1179	-131
161.696	-62.1179	-133
161.695	-62.1178	-137
161.695	-62.1177	-139
161.695	-62.1177	-140
161.695	-62.1176	-144
161.695	-62.1174	-149
161.695	-62.1173	-152
161.695	-62.1173	-154
161.694	-62.1171	-161
161.694	-62.1171	-162
161.694	-62.117	-164
161.694	-62.1168	-170
161.694	-62.1168	-171
161.694	-62.1168	-173
161.694	-62.1167	-174
161.693	-62.1166	-179
161.693	-62.1165	-180
161.693	-62.1164	-184
161.693	-62.1162	-192
161.693	-62.1162	-193
161.693	-62.1161	-194
161.693	-62.116	-200
161.692	-62.1159	-201
161.692	-62.1159	-202
161.692	-62.1159	-203
161.692	-62.1158	-205
161.692	-62.1157	-209
161.692	-62.1156	-211
161.692	-62.1155	-215
161.692	-62.1155	-216
161.691	-62.1153	-221
161.691	-62.1153	-223
161.691	-62.1152	-224
161.691	-62.1151	-229
161.691	-62.115	-230
161.691	-62.115	-231
161.691	-62.1148	-238
161.691	-62.1148	-240
161.69	-62.1147	-243
161.69	-62.1145	-246
161.69	-62.1144	-250
161.69	-62.1144	-252
161.69	-62.1142	-257
161.69	-62.1142	-258
161.69	-62.1141	-259
161.689	-62.114	-264
161.689	-62.1139	-266
161.689	-62.1139	-267
161.689	-62.1138	-269
161.689	-62.1136	-274
161.689	-62.1136	-277
161.689	-62.1135	-278
161.688	-62.1133	-283
161.688	-62.1133	-284
161.688	-62.1133	-285
161.688	-62.1131	-290
161.688	-62.113	-291
161.688	-62.113	-293
161.688	-62.1129	-294
161.687	-62.1128	-298
161.687	-62.1127	-298
161.687	-62.1127	-301
161.687	-62.1126	-303
161.687	-62.1124	-307
161.687	-62.1124	-308
161.687	-62.1123	-310
161.686	-62.1122	-314
161.686	-62.1122	-314
161.686	-62.1121	-316
161.686	-62.1121	-317
161.686	-62.112	-319
161.686	-62.1119	-322
161.686	-62.1118	-323
161.686	-62.1118	-324
161.686	-62.1116	-330
161.685	-62.1115	-332
161.685	-62.1115	-332
161.685	-62.1114	-333
161.685	-62.1113	-336
161.685	-62.1113	-337
161.685	-62.1112	-338
161.685	-62.111	-345
161.684	-62.1109	-345
161.684	-62.1108	-348
161.684	-62.1107	-351
161.684	-62.1106	-352
161.684	-62.1106	-353
161.684	-62.1104	-358
161.684	-62.1103	-360
161.683	-62.1103	-360
161.683	-62.1101	-364
161.683	-62.1101	-365
161.683	-62.11	-367
161.683	-62.1099	-368
161.683	-62.1099	-371
161.683	-62.1098	-372
161.683	-62.1097	-373
161.682	-62.1097	-375
161.682	-62.1095	-379
161.682	-62.1095	-380
161.682	-62.1094	-381
161.682	-62.1092	-384
161.682	-62.1092	-386
161.682	-62.1091	-387
161.682	-62.1091	-388
161.681	-62.109	-390
161.681	-62.1089	-391
161.681	-62.1088	-394
161.681	-62.1087	-397
161.681	-62.1086	-397
161.681	-62.1086	-398
161.68	-62.1084	-403
161.68	-62.1084	-404
161.68	-62.1083	-405
161.68	-62.1082	-405
161.68	-62.1082	-406
161.68	-62.1081	-410
161.68	-62.108	-410
161.68	-62.1079	-412
161.68	-62.1078	-415
161.679	-62.1077	-417
161.679	-62.1077	-418
161.679	-62.1076	-418
161.679	-62.1075	-421
161.679	-62.1075	-422
161.679	-62.1074	-423
161.679	-62.1073	-427
161.679	-62.1072	-428
161.679	-62.1072	-428
161.678	-62.1071	-430
161.678	-62.1069	-432
161.678	-62.1068	-434
161.678	-62.1068	-436
161.678	-62.1066	-439
161.678	-62.1066	-440
161.677	-62.1065	-441
161.677	-62.1063	-445
161.677	-62.1063	-446
161.677	-62.1063	-445
161.677	-62.1062	-447
161.677	-62.1062	-447
161.677	-62.1061	-448
161.677	-62.106	-450
161.677	-62.1059	-452
161.676	-62.1059	-453
161.676	-62.1057	-457
161.676	-62.1057	-457
161.676	-62.1056	-457
161.676	-62.1055	-460
161.676	-62.1054	-462
161.676	-62.1054	-462
161.676	-62.1053	-464
161.676	-62.1053	-465
161.675	-62.1052	-467
161.675	-62.1051	-468
161.675	-62.105	-469
161.675	-62.1048	-472
161.675	-62.1047	-474
161.675	-62.1047	-476
161.674	-62.1046	-478
161.674	-62.1045	-479
161.674	-62.1045	-479
161.674	-62.1044	-480
161.674	-62.1043	-482
161.674	-62.1042	-482
161.674	-62.1042	-483
161.674	-62.1041	-486
161.673	-62.104	-488
161.673	-62.1039	-490
161.673	-62.1039	-491
161.673	-62.1038	-491
161.673	-62.1037	-494
161.673	-62.1036	-494
161.673	-62.1036	-494
161.673	-62.1034	-497
161.672	-62.1034	-499
161.672	-62.1033	-500
161.672	-62.1033	-501
161.672	-62.1033	-501
161.672	-62.1031	-502
161.672	-62.103	-504
161.672	-62.103	-505
161.672	-62.1028	-508
161.671	-62.1028	-508
161.671	-62.1026	-511
161.671	-62.1025	-512
161.671	-62.1025	-513
161.671	-62.1024	-514
161.671	-62.1024	-515
161.671	-62.1023	-516
161.671	-62.1022	-517
161.67	-62.1021	-518
161.67	-62.1021	-519
161.67	-62.1019	-523
161.67	-62.1019	-523
161.67	-62.1018	-523
161.67	-62.1017	-525
161.67	-62.1016	-525
161.67	-62.1016	-526
161.67	-62.1015	-528
161.669	-62.1015	-529
161.669	-62.1014	-530
161.669	-62.1013	-532
161.669	-62.1012	-533
161.669	-62.1011	-534
161.669	-62.101	-535
161.669	-62.1009	-536
161.669	-62.1009	-537
161.668	-62.1008	-539
161.668	-62.1007	-540
161.668	-62.1007	-541
161.668	-62.1004	-544
161.668	-62.1004	-544
161.668	-62.1003	-545
161.667	-62.1001	-546
161.667	-62.1001	-548
161.667	-62.1	-550
161.667	-62.1	-551
161.667	-62.0998	-552
161.667	-62.0998	-552
161.667	-62.0997	-552
161.666	-62.0996	-555
161.666	-62.0995	-554
161.666	-62.0995	-555
161.666	-62.0994	-557
161.666	-62.0993	-558
161.666	-62.0992	-560
161.666	-62.0991	-560
161.666	-62.0991	-561
161.665	-62.0989	-562
161.665	-62.0989	-562
161.665	-62.0988	-563
161.665	-62.0987	-565
161.665	-62.0986	-567
161.665	-62.0986	-568
161.665	-62.0986	-569
161.664	-62.0984	-568
161.664	-62.0984	-570
161.664	-62.0983	-569
161.664	-62.0982	-570
161.664	-62.0981	-572
161.664	-62.0981	-572
161.664	-62.098	-573
161.664	-62.0979	-574
161.664	-62.0978	-575
161.663	-62.0978	-576
161.663	-62.0977	-577
161.663	-62.0976	-576
161.663	-62.0975	-577
161.663	-62.0975	-577
161.663	-62.0975	-578
161.663	-62.0974	-580
161.663	-62.0973	-582
161.662	-62.0972	-582
161.662	-62.0971	-581
161.662	-62.0971	-581
161.662	-62.0969	-583
161.662	-62.0969	-583
161.662	-62.0968	-584
161.662	-62.0966	-586
161.662	-62.0966	-587
161.662	-62.0966	-586
161.661	-62.0965	-587
161.661	-62.0964	-588
161.661	-62.0963	-588
161.661	-62.0962	-587
161.661	-62.0962	-589
161.661	-62.096	-589
161.661	-62.096	-590
161.661	-62.0959	-590
161.66	-62.0958	-592
161.66	-62.0957	-591
161.66	-62.0957	-591
161.66	-62.0956	-592
161.66	-62.0956	-592
161.66	-62.0955	-592
161.66	-62.0955	-593
161.66	-62.0954	-594
161.659	-62.0953	-595
161.659	-62.0952	-594
161.659	-62.0951	-594
161.659	-62.0951	-594
161.659	-62.0949	-594
161.659	-62.0949	-595
161.659	-62.0949	-597
161.659	-62.0948	-598
161.658	-62.0948	-597
161.658	-62.0946	-597
161.658	-62.0946	-597
161.658	-62.0945	-597
161.658	-62.0944	-597
161.658	-62.0943	-597
161.658	-62.0942	-597
161.658	-62.0942	-598
161.657	-62.0941	-598
161.657	-62.094	-599
161.657	-62.094	-598
161.657	-62.0939	-598
161.657	-62.0939	-599
161.657	-62.0937	-598
161.657	-62.0937	-598
161.657	-62.0936	-599
161.656	-62.0935	-599
161.656	-62.0934	-599
161.656	-62.0933	-599
161.656	-62.0931	-598
161.656	-62.0931	-599
161.656	-62.093	-599
161.655	-62.0929	-599
161.655	-62.0928	-599
161.655	-62.0928	-600
161.655	-62.0927	-600
161.655	-62.0926	-600
161.655	-62.0925	-599
161.655	-62.0924	-599
161.655	-62.0924	-598
161.654	-62.0922	-599
161.654	-62.0922	-599
161.654	-62.0921	-598
161.654	-62.0919	-598
161.654	-62.0919	-598
161.654	-62.0919	-598
161.654	-62.0918	-599
161.654	-62.0917	-598
161.653	-62.0916	-598
161.653	-62.0915	-597
161.653	-62.0915	-598
161.653	-62.0913	-597
161.653	-62.0913	-597
161.653	-62.0912	-597
161.653	-62.0911	-597
161.653	-62.091	-595
161.652	-62.091	-596
161.652	-62.0909	-596
161.652	-62.0909	-596
161.652	-62.0908	-596
161.652	-62.0907	-596
161.652	-62.0906	-594
161.652	-62.0906	-595
161.652	-62.0905	-595
161.651	-62.0904	-593
161.651	-62.0904	-594
161.651	-62.0903	-595
161.651	-62.0902	-593
161.651	-62.0901	-593
161.651	-62.0901	-593
161.651	-62.0899	-592
161.651	-62.0898	-592
161.65	-62.0898	-591
161.65	-62.0897	-591
161.65	-62.0896	-589
161.65	-62.0895	-590
161.65	-62.0894	-590
161.65	-62.0894	-589
161.65	-62.0892	-589
161.649	-62.0892	-588
161.649	-62.0891	-588
161.649	-62.089	-587
161.649	-62.0889	-586
161.649	-62.0889	-587
161.649	-62.0887	-586
161.649	-62.0886	-586
161.648	-62.0885	-585
161.648	-62.0885	-585
161.648	-62.0883	-583
161.648	-62.0883	-583
161.648	-62.0882	-583
161.648	-62.088	-582
161.648	-62.088	-582
161.647	-62.0879	-582
161.647	-62.0879	-582
161.647	-62.0877	-579
161.647	-62.0877	-580
161.647	-62.0876	-580
161.647	-62.0876	-579
161.647	-62.0874	-578
161.646	-62.0873	-578
161.646	-62.0873	-577
161.646	-62.0871	-577
161.646	-62.0871	-576
161.646	-62.087	-576
161.646	-62.087	-576
161.646	-62.0869	-576
161.646	-62.0868	-575
161.646	-62.0868	-575
161.645	-62.0866	-575
161.645	-62.0865	-574
161.645	-62.0864	-573
161.645	-62.0864	-573
161.645	-62.0863	-573
161.645	-62.0862	-572
161.645	-62.0861	-572
161.645	-62.0861	-571
161.644	-62.0859	-571
161.644	-62.0858	-571
161.644	-62.0858	-571
161.644	-62.0857	-571
161.644	-62.0855	-569
161.644	-62.0855	-569
161.643	-62.0854	-570
161.643	-62.0852	-568
161.643	-62.0852	-568
161.643	-62.0851	-568
161.643	-62.0849	-568
161.643	-62.0849	-567
161.643	-62.0849	-568
161.642	-62.0848	-567
161.642	-62.0847	-566
161.642	-62.0846	-565
161.642	-62.0845	-566
161.642	-62.0845	-567
161.642	-62.0843	-565
161.642	-62.0842	-565
161.641	-62.0842	-565
161.641	-62.084	-563
161.641	-62.084	-564
161.641	-62.0839	-564
161.641	-62.0839	-564
161.641	-62.0837	-564
161.641	-62.0837	-564
161.64	-62.0836	-564
161.64	-62.0834	-564
161.64	-62.0834	-563
161.64	-62.0833	-563
161.64	-62.0831	-564
161.64	-62.0831	-564
161.64	-62.083	-564
161.639	-62.0829	-564
161.639	-62.0828	-563
161.639	-62.0828	-563
161.639	-62.0827	-563
161.639	-62.0826	-563
161.639	-62.0825	-563
161.638	-62.0824	-563
161.638	-62.0823	-564
161.638	-62.0823	-563
161.638	-62.0822	-563
161.638	-62.0821	-563
161.638	-62.0821	-563
161.638	-62.0819	-563
161.638	-62.0818	-563
161.638	-62.0818	-563
161.637	-62.0817	-563
161.637	-62.0815	-563
161.637	-62.0814	-564
161.637	-62.0814	-563
161.637	-62.0812	-563
161.637	-62.0812	-564
161.636	-62.081	-565
161.636	-62.0809	-564
161.636	-62.0809	-564
161.636	-62.0808	-564
161.636	-62.0807	-564
161.636	-62.0807	-564
161.635	-62.0806	-564
161.635	-62.0805	-564
161.635	-62.0803	-566
161.635	-62.0803	-565
161.635	-62.0802	-566
161.635	-62.0801	-565
161.635	-62.08	-566
161.635	-62.08	-566
161.634	-62.0799	-565
161.634	-62.0797	-567
161.634	-62.0797	-566
161.634	-62.0796	-568
161.634	-62.0795	-567
161.634	-62.0794	-566
161.634	-62.0793	-567
161.633	-62.0793	-567
161.633	-62.0791	-567
161.633	-62.0791	-568
161.633	-62.0791	-568
161.633	-62.0789	-568
161.633	-62.0788	-569
161.633	-62.0788	-568
161.632	-62.0787	-569
161.632	-62.0785	-569
161.632	-62.0784	-569
161.632	-62.0784	-570
161.632	-62.0782	-571
161.632	-62.0782	-571
161.632	-62.0781	-569
161.631	-62.078	-571
161.631	-62.0779	-571
161.631	-62.0779	-570
161.631	-62.0778	-571
161.631	-62.0778	-572
161.631	-62.0776	-572
161.631	-62.0775	-572
161.63	-62.0775	-573
161.63	-62.0773	-573
161.63	-62.0772	-573
161.63	-62.0772	-573
161.63	-62.077	-574
161.63	-62.077	-574
161.63	-62.0769	-574
161.629	-62.0769	-574
161.629	-62.0767	-575
161.629	-62.0766	-574
161.629	-62.0765	-575
161.629	-62.0763	-576
161.629	-62.0763	-575
161.629	-62.0762	-576
161.628	-62.0761	-575
161.628	-62.0761	-576
161.628	-62.076	-576
161.628	-62.0759	-576
161.628	-62.0758	-578
161.628	-62.0757	-576
161.628	-62.0756	-578
161.627	-62.0755	-577
161.627	-62.0754	-577
161.627	-62.0753	-578
161.627	-62.0753	-578
161.627	-62.0752	-577
161.627	-62.0751	-577
161.627	-62.0751	-579
161.627	-62.075	-579
161.626	-62.0749	-578
161.626	-62.0749	-579
161.626	-62.0748	-579
161.626	-62.0747	-579
161.626	-62.0746	-579
161.626	-62.0745	-579
161.626	-62.0744	-579
161.625	-62.0743	-579
161.625	-62.0742	-579
161.625	-62.0742	-579
161.625	-62.074	-580
161.625	-62.074	-580
161.625	-62.0739	-580
161.624	-62.0737	-580
161.624	-62.0737	-580
161.624	-62.0736	-580
161.624	-62.0735	-579
161.624	-62.0733	-579
161.624	-62.0733	-579
161.624	-62.0733	-579
161.623	-62.0731	-579
161.623	-62.073	-580
161.623	-62.073	-579
161.623	-62.0729	-580
161.623	-62.0728	-579
161.623	-62.0727	-579
161.623	-62.0726	-578
161.623	-62.0725	-578
161.622	-62.0724	-579
161.622	-62.0724	-580
161.622	-62.0723	-579
161.622	-62.0722	-578
161.622	-62.0721	-577
161.622	-62.0721	-578
161.622	-62.072	-577
161.622	-62.0719	-577
161.621	-62.0718	-577
161.621	-62.0718	-577
161.621	-62.0717	-578
161.621	-62.0716	-577
161.621	-62.0715	-576
161.621	-62.0714	-575
161.621	-62.0714	-575
161.62	-62.0712	-575
161.62	-62.0712	-575
161.62	-62.0711	-576
161.62	-62.071	-575
161.62	-62.0709	-574
161.62	-62.0709	-574
161.619	-62.0706	-573
161.619	-62.0705	-573
161.619	-62.0705	-572
161.619	-62.0703	-572
161.619	-62.0703	-571
161.619	-62.0702	-571
161.619	-62.0701	-571
161.618	-62.07	-570
161.618	-62.07	-569
161.618	-62.0698	-568
161.618	-62.0697	-568
161.618	-62.0696	-568
161.618	-62.0696	-567
161.618	-62.0694	-566
161.617	-62.0694	-566
161.617	-62.0693	-565
161.617	-62.0692	-565
161.617	-62.0691	-564
161.617	-62.0691	-563
161.617	-62.069	-563
161.617	-62.069	-562
161.617	-62.0689	-562
161.617	-62.0688	-563
161.616	-62.0687	-561
161.616	-62.0686	-560
161.616	-62.0685	-559
161.616	-62.0684	-559
161.616	-62.0684	-560
161.616	-62.0683	-557
161.616	-62.0682	-557
161.616	-62.0682	-557
161.615	-62.0681	-558
161.615	-62.0681	-557
161.615	-62.068	-554
161.615	-62.0679	-554
161.615	-62.0679	-554
161.615	-62.0678	-553
161.615	-62.0677	-553
161.615	-62.0676	-551
161.615	-62.0675	-552
161.614	-62.0673	-549
161.614	-62.0673	-549
161.614	-62.0672	-549
161.614	-62.0671	-547
161.614	-62.067	-547
161.614	-62.067	-545
161.613	-62.0667	-544
161.613	-62.0666	-542
161.613	-62.0664	-540
161.613	-62.0664	-540
161.613	-62.0663	-539
161.612	-62.0662	-538
161.612	-62.0661	-537
161.612	-62.0661	-536
161.612	-62.066	-536
161.612	-62.0659	-534
161.612	-62.0658	-533
161.612	-62.0657	-533
161.612	-62.0657	-532
161.611	-62.0656	-531
161.611	-62.0655	-529
161.611	-62.0654	-529
161.611	-62.0654	-529
161.611	-62.0653	-527
161.611	-62.0652	-527
161.611	-62.0652	-527
161.611	-62.0651	-526
161.611	-62.0651	-525
161.61	-62.0649	-524
161.61	-62.0649	-523
161.61	-62.0648	-521
161.61	-62.0647	-520
161.61	-62.0646	-519
161.61	-62.0645	-519
161.61	-62.0645	-518
161.609	-62.0644	-516
161.609	-62.0643	-515
161.609	-62.0643	-515
161.609	-62.0641	-513
161.609	-62.064	-513
161.609	-62.064	-511
161.609	-62.0639	-509
161.608	-62.0638	-509
161.608	-62.0637	-508
161.608	-62.0636	-507
161.608	-62.0634	-504
161.608	-62.0634	-504
161.607	-62.0632	-501
161.607	-62.0631	-501
161.607	-62.0631	-500
161.607	-62.063	-500
161.607	-62.0629	-497
161.607	-62.0628	-497
161.607	-62.0627	-496
161.607	-62.0627	-496
161.606	-62.0625	-494
161.606	-62.0624	-493
161.606	-62.0624	-493
161.606	-62.0622	-490
161.606	-62.0622	-491
161.606	-62.0622	-490
161.606	-62.0621	-489
161.606	-62.0621	-488
161.606	-62.062	-487
161.605	-62.0619	-486
161.605	-62.0618	-486
161.605	-62.0618	-485
161.605	-62.0617	-483
161.605	-62.0616	-483
161.605	-62.0615	-482
161.605	-62.0615	-482
161.605	-62.0614	-481
161.604	-62.0613	-480
161.604	-62.0613	-479
161.604	-62.0611	-477
161.604	-62.061	-477
161.604	-62.061	-476
161.604	-62.0609	-474
161.604	-62.0607	-474
161.603	-62.0607	-473
161.603	-62.0606	-473
161.603	-62.0605	-472
161.603	-62.0604	-470
161.603	-62.0604	-470
161.603	-62.0603	-469
161.603	-62.0601	-467
161.603	-62.0601	-467
161.602	-62.06	-467
161.602	-62.0599	-466
161.602	-62.0598	-464
161.602	-62.0597	-464
161.602	-62.0597	-463
161.602	-62.0595	-461
161.602	-62.0595	-461
161.601	-62.0592	-459
161.601	-62.0592	-459
161.601	-62.0592	-458
161.601	-62.0591	-458
161.601	-62.0591	-458
161.601	-62.059	-455
161.601	-62.0589	-456
161.6	-62.0588	-455
161.6	-62.0588	-455
161.6	-62.0586	-453
161.6	-62.0585	-453
161.6	-62.0585	-453
161.6	-62.0584	-452
161.6	-62.0583	-451
161.6	-62.0583	-450
161.599	-62.0582	-449
161.599	-62.058	-448
161.599	-62.058	-449
161.599	-62.0579	-448
161.599	-62.0578	-448
161.599	-62.0577	-446
161.598	-62.0576	-446
161.598	-62.0576	-446
161.598	-62.0575	-444
161.598	-62.0574	-444
161.598	-62.0574	-444
161.598	-62.0572	-444
161.598	-62.0571	-443
161.598	-62.0571	-441
161.597	-62.057	-442
161.597	-62.0568	-441
161.597	-62.0567	-441
161.597	-62.0567	-440
161.597	-62.0565	-439
161.597	-62.0564	-440
161.597	-62.0564	-439
161.596	-62.0562	-438
161.596	-62.0562	-438
161.596	-62.0561	-438
161.596	-62.0561	-437
161.596	-62.056	-436
161.596	-62.0559	-437
161.596	-62.0558	-436
161.596	-62.0558	-436
161.595	-62.0556	-436
161.595	-62.0555	-436
161.595	-62.0555	-435
161.595	-62.0553	-435
161.595	-62.0553	-435
161.595	-62.0552	-433
161.595	-62.0551	-433
161.594	-62.055	-433
161.594	-62.055	-434
161.594	-62.0549	-434
161.594	-62.0548	-433
161.594	-62.0547	-431
161.594	-62.0546	-432
161.594	-62.0546	-432
161.594	-62.0545	-433
161.594	-62.0544	-432
161.593	-62.0543	-431
161.593	-62.0543	-431
161.593	-62.0543	-431
161.593	-62.0541	-430
161.593	-62.054	-429
161.593	-62.054	-431
161.593	-62.0538	-430
161.592	-62.0537	-430
161.592	-62.0536	-429
161.592	-62.0535	-430
161.592	-62.0534	-429
161.592	-62.0534	-429
161.592	-62.0532	-429
161.592	-62.0532	-429
161.592	-62.0531	-428
161.591	-62.053	-429
161.591	-62.0529	-429
161.591	-62.0528	-428
161.591	-62.0528	-428
161.591	-62.0526	-428
161.591	-62.0525	-427
161.59	-62.0523	-428
161.59	-62.0523	-428
161.59	-62.0522	-428
161.59	-62.0521	-428
161.59	-62.0521	-428
161.59	-62.052	-427
161.59	-62.052	-427
161.59	-62.0518	-428
161.589	-62.0516	-427
161.589	-62.0516	-428
161.589	-62.0515	-427
161.589	-62.0514	-427
161.589	-62.0514	-427
161.589	-62.0513	-427
161.589	-62.0513	-427
161.589	-62.0512	-427
161.588	-62.0511	-426
161.588	-62.051	-427
161.588	-62.051	-427
161.588	-62.0509	-427
161.588	-62.0508	-426
161.588	-62.0507	-427
161.588	-62.0507	-427
161.588	-62.0506	-427
161.587	-62.0505	-427
161.587	-62.0504	-428
161.587	-62.0504	-427
161.587	-62.0504	-428
161.587	-62.0503	-427
161.587	-62.0502	-426
161.587	-62.0502	-427
161.587	-62.0501	-427
161.586	-62.0499	-427
161.586	-62.0498	-427
161.586	-62.0498	-426
161.586	-62.0496	-427
161.586	-62.0496	-427
161.586	-62.0495	-428
161.586	-62.0495	-427
161.585	-62.0493	-427
161.585	-62.0493	-427
161.585	-62.0492	-428
161.585	-62.0492	-428
161.585	-62.0491	-427
161.585	-62.049	-428
161.585	-62.0489	-428
161.585	-62.0489	-428
161.584	-62.0487	-427
161.584	-62.0486	-427
161.584	-62.0486	-428
161.584	-62.0485	-428
161.584	-62.0484	-428
161.584	-62.0484	-428
161.584	-62.0483	-427
161.584	-62.0483	-427
161.584	-62.0481	-428
161.583	-62.0481	-428
161.583	-62.048	-428
161.583	-62.048	-428
161.583	-62.0478	-428
161.583	-62.0477	-428
161.583	-62.0477	-428
161.583	-62.0476	-427
161.583	-62.0475	-428
161.582	-62.0475	-429
161.582	-62.0474	-428
161.582	-62.0474	-429
161.582	-62.0472	-429
161.582	-62.0472	-429
161.582	-62.0471	-428
161.582	-62.047	-429
161.581	-62.0469	-429
161.581	-62.0468	-428
161.581	-62.0468	-429
161.581	-62.0466	-429
161.581	-62.0466	-429
161.581	-62.0465	-430
161.581	-62.0465	-429
161.581	-62.0464	-429
161.581	-62.0463	-429
161.581	-62.0463	-430
161.58	-62.0462	-430
161.58	-62.046	-431
161.58	-62.0459	-430
161.58	-62.0459	-431
161.58	-62.0458	-430
161.58	-62.0457	-429
161.58	-62.0457	-430
161.579	-62.0456	-431
161.579	-62.0454	-431
161.579	-62.0454	-431
161.579	-62.0453	-430
161.579	-62.0453	-431
161.579	-62.0451	-431
161.579	-62.045	-431
161.578	-62.0448	-432
161.578	-62.0447	-433
161.578	-62.0447	-432
161.578	-62.0446	-431
161.578	-62.0445	-432
161.578	-62.0444	-431
161.578	-62.0444	-432
161.577	-62.0444	-432
161.577	-62.0442	-433
161.577	-62.0442	-433
161.577	-62.0441	-432
161.577	-62.044	-432
161.577	-62.0438	-432
161.577	-62.0438	-433
161.577	-62.0437	-433
161.576	-62.0436	-432
161.576	-62.0435	-433
161.576	-62.0435	-433
161.576	-62.0433	-433
161.576	-62.0432	-433
161.576	-62.0431	-433
161.575	-62.043	-433
161.575	-62.0429	-434
161.575	-62.0429	-434
161.575	-62.0428	-435
161.575	-62.0427	-434
161.575	-62.0426	-433
161.575	-62.0426	-434
161.574	-62.0424	-435
161.574	-62.0423	-434
161.574	-62.0423	-435
161.574	-62.0422	-434
161.574	-62.042	-435
161.574	-62.042	-435
161.574	-62.0419	-435
161.573	-62.0417	-435
161.573	-62.0417	-435
161.573	-62.0414	-436
161.573	-62.0414	-436
161.573	-62.0414	-435
161.573	-62.0413	-435
161.573	-62.0412	-435
161.572	-62.0411	-435
161.572	-62.041	-436
161.572	-62.041	-437
161.572	-62.0408	-437
161.572	-62.0408	-436
161.572	-62.0407	-435
161.571	-62.0406	-437
161.571	-62.0405	-437
161.571	-62.0405	-436
161.571	-62.0404	-437
161.571	-62.0404	-437
161.571	-62.0403	-436
161.571	-62.0402	-437
161.571	-62.0401	-437
161.571	-62.04	-437
161.57	-62.0399	-437
161.57	-62.0399	-437
161.57	-62.0398	-436
161.57	-62.0397	-437
161.57	-62.0396	-437
161.57	-62.0396	-438
161.57	-62.0395	-437
161.57	-62.0395	-437
161.57	-62.0394	-438
161.569	-62.0393	-438
161.569	-62.0392	-437
161.569	-62.0391	-437
161.569	-62.039	-437
161.569	-62.039	-437
161.569	-62.0388	-438
161.568	-62.0387	-439
161.568	-62.0387	-438
161.568	-62.0385	-438
161.568	-62.0385	-437
161.568	-62.0384	-438
161.568	-62.0384	-438
161.568	-62.0383	-438
161.568	-62.0382	-438
161.568	-62.0382	-438
161.567	-62.0381	-438
161.567	-62.038	-438
161.567	-62.0379	-438
161.567	-62.0378	-439
161.567	-62.0378	-439
161.567	-62.0376	-439
161.566	-62.0376	-439
161.566	-62.0375	-438
161.566	-62.0375	-439
161.566	-62.0373	-437
161.566	-62.0373	-437
161.566	-62.0372	-438
161.566	-62.037	-438
161.565	-62.0369	-439
161.565	-62.0369	-438
161.565	-62.0367	-439
161.565	-62.0367	-438
161.565	-62.0366	-438
161.565	-62.0366	-438
161.565	-62.0365	-438
161.565	-62.0364	-438
161.565	-62.0364	-439
161.564	-62.0363	-438
161.564	-62.0361	-438
161.564	-62.036	-438
161.564	-62.036	-438
161.564	-62.0359	-439
161.564	-62.0358	-437
161.564	-62.0358	-437
161.564	-62.0357	-438
161.563	-62.0357	-437
161.563	-62.0355	-438
161.563	-62.0354	-438
161.563	-62.0354	-438
161.563	-62.0352	-437
161.563	-62.0351	-437
161.562	-62.0351	-437
161.562	-62.035	-437
161.562	-62.0349	-437
161.562	-62.0349	-437
161.562	-62.0348	-437
161.562	-62.0346	-436
161.562	-62.0346	-436
161.562	-62.0346	-437
161.561	-62.0345	-437
161.561	-62.0343	-436
161.561	-62.0342	-435
161.561	-62.0342	-436
161.561	-62.034	-436
161.561	-62.034	-436
161.561	-62.0339	-435
161.56	-62.0338	-435
161.56	-62.0337	-435
161.56	-62.0337	-435
161.56	-62.0337	-435
161.56	-62.0336	-435
161.56	-62.0335	-435
161.56	-62.0334	-435
161.56	-62.0333	-435
161.559	-62.0333	-435
161.559	-62.0331	-434
161.559	-62.0331	-433
161.559	-62.033	-433
161.559	-62.0329	-434
161.559	-62.0329	-434
161.559	-62.0328	-434
161.558	-62.0326	-432
161.558	-62.0326	-432
161.558	-62.0326	-432
161.558	-62.0324	-431
161.558	-62.0323	-433
161.558	-62.0322	-432
161.558	-62.0321	-432
161.557	-62.032	-431
161.557	-62.032	-430
161.557	-62.0319	-430
161.557	-62.0317	-430
161.557	-62.0317	-431
161.557	-62.0316	-430
161.557	-62.0316	-430
161.557	-62.0316	-430
161.556	-62.0314	-428
161.556	-62.0313	-428
161.556	-62.0313	-429
161.556	-62.0311	-427
161.556	-62.0311	-428
161.555	-62.0308	-427
161.555	-62.0308	-426
161.555	-62.0307	-426
161.555	-62.0307	-427
161.555	-62.0306	-426
161.555	-62.0305	-426
161.555	-62.0304	-425
161.555	-62.0304	-425
161.554	-62.0302	-424
161.554	-62.0302	-424
161.554	-62.0301	-424
161.554	-62.0299	-422
161.554	-62.0299	-423
161.554	-62.0299	-423
161.554	-62.0298	-422
161.553	-62.0297	-421
161.553	-62.0296	-421
161.553	-62.0295	-421
161.553	-62.0294	-420
161.553	-62.0293	-419
161.553	-62.0293	-419
161.553	-62.0292	-419
161.553	-62.0291	-418
161.553	-62.029	-418
161.552	-62.029	-418
161.552	-62.0289	-416
161.552	-62.0288	-416
161.552	-62.0288	-416
161.552	-62.0287	-415
161.552	-62.0285	-414
161.551	-62.0284	-413
161.551	-62.0284	-413
161.551	-62.0283	-412
161.551	-62.0282	-412
161.551	-62.0281	-412
161.551	-62.0281	-412
161.551	-62.0279	-410
161.551	-62.0279	-409
161.55	-62.0278	-408
161.55	-62.0277	-410
161.55	-62.0276	-407
161.55	-62.0276	-407
161.55	-62.0275	-407
161.55	-62.0275	-407
161.55	-62.0273	-405
161.55	-62.0272	-404
161.549	-62.0272	-404
161.549	-62.027	-402
161.549	-62.027	-401
161.549	-62.0269	-402
161.549	-62.0267	-401
161.549	-62.0267	-401
161.549	-62.0266	-398
161.548	-62.0266	-398
161.548	-62.0264	-398
161.548	-62.0263	-396
161.548	-62.0263	-395
161.548	-62.0262	-395
161.548	-62.0261	-394
161.548	-62.0261	-393
161.547	-62.026	-393
161.547	-62.0258	-392
161.547	-62.0258	-391
161.547	-62.0257	-391
161.547	-62.0256	-390
161.547	-62.0256	-388
161.547	-62.0255	-387
161.547	-62.0254	-386
161.546	-62.0254	-386
161.546	-62.0252	-386
161.546	-62.0252	-385
161.546	-62.0251	-384
161.546	-62.025	-381
161.546	-62.0249	-381
161.546	-62.0249	-381
161.545	-62.0248	-380
161.545	-62.0246	-378
161.545	-62.0245	-377
161.545	-62.0245	-377
161.545	-62.0243	-374
161.545	-62.0243	-374
161.545	-62.0242	-373
161.544	-62.0241	-371
161.544	-62.024	-370
161.544	-62.024	-370
161.544	-62.0239	-369
161.544	-62.0237	-366
161.544	-62.0237	-365
161.543	-62.0236	-365
161.543	-62.0234	-363
161.543	-62.0234	-362
161.543	-62.0234	-362
161.543	-62.0232	-360
161.543	-62.0232	-359
161.543	-62.0231	-358
161.543	-62.0231	-358
161.542	-62.0229	-355
161.542	-62.0229	-354
161.542	-62.0228	-354
161.542	-62.0228	-353
161.542	-62.0227	-352
161.542	-62.0226	-350
161.542	-62.0225	-349
161.542	-62.0225	-349
161.541	-62.0224	-347
161.541	-62.0223	-346
161.541	-62.0223	-346
161.541	-62.0222	-346
161.541	-62.0222	-345
161.541	-62.0221	-343
161.541	-62.022	-342
161.541	-62.0219	-341
161.54	-62.0218	-339
161.54	-62.0217	-338
161.54	-62.0217	-337
161.54	-62.0216	-335
161.54	-62.0215	-334
161.54	-62.0214	-334
161.54	-62.0214	-333
161.539	-62.0212	-332
161.539	-62.0211	-330
161.539	-62.0211	-328
161.539	-62.021	-329
161.539	-62.021	-328
161.539	-62.0209	-325
161.539	-62.0208	-324
161.539	-62.0207	-324
161.538	-62.0205	-321
161.538	-62.0205	-321
161.538	-62.0204	-320
161.538	-62.0202	-317
161.538	-62.0202	-316
161.538	-62.0202	-316
161.538	-62.0201	-315
161.537	-62.02	-314
161.537	-62.0199	-313
161.537	-62.0199	-312
161.537	-62.0198	-311
161.537	-62.0196	-309
161.537	-62.0196	-308
161.537	-62.0196	-307
161.536	-62.0194	-305
161.536	-62.0194	-305
161.536	-62.0193	-304
161.536	-62.0193	-304
161.536	-62.0192	-303
161.536	-62.0191	-301
161.536	-62.0191	-301
161.536	-62.019	-300
161.536	-62.0189	-300
161.535	-62.0188	-298
161.535	-62.0187	-297
161.535	-62.0187	-296
161.535	-62.0187	-295
161.535	-62.0185	-294
161.535	-62.0185	-294
161.535	-62.0184	-293
[truncated: 15,657 more rows]

## Sheet: Line3
Longitude	Latitude	Mag Anomaly (nT)
160.982	-60.0211	-323.2
160.982	-60.0213	-323.3
160.982	-60.0216	-323.3
160.982	-60.0217	-323.8
160.982	-60.0218	-323.7
160.983	-60.022	-323.2
160.983	-60.0222	-324.6
160.983	-60.0224	-324.5
160.984	-60.0231	-324.3
160.985	-60.0238	-324.6
160.985	-60.0241	-324
160.985	-60.0243	-324.3
160.986	-60.0245	-322.8
160.986	-60.025	-323.3
160.986	-60.0253	-322.4
160.987	-60.0256	-322.4
160.987	-60.0259	-321.7
160.986	-60.0245	-322
160.988	-60.0272	-322.1
160.989	-60.0274	-320.8
160.989	-60.0274	-322.1
160.989	-60.0276	-321.1
160.989	-60.0278	-321.6
160.99	-60.0281	-321.9
160.99	-60.0282	-321.5
160.99	-60.0283	-321.9
160.99	-60.0285	-322.3
160.99	-60.0288	-322.5
160.991	-60.0289	-322.1
160.991	-60.0291	-322.5
160.991	-60.0294	-322.7
160.991	-60.0296	-322.9
160.992	-60.0302	-323.8
160.992	-60.0302	-323.2
160.992	-60.0304	-324.7
160.992	-60.0305	-323.9
160.993	-60.0307	-324.6
160.993	-60.0309	-324.9
160.993	-60.0312	-325.2
160.993	-60.0314	-325.6
160.994	-60.0318	-326.2
160.994	-60.032	-326.4
160.994	-60.0321	-326.6
160.994	-60.0321	-327.2
160.994	-60.0324	-327
160.995	-60.0326	-327.8
160.995	-60.0327	-327.6
160.996	-60.0334	-327.7
160.996	-60.0336	-329
160.996	-60.0338	-328
160.996	-60.034	-328.8
160.996	-60.034	-329.2
160.997	-60.0345	-329.4
160.997	-60.0346	-329.8
160.997	-60.0349	-330.1
160.998	-60.0352	-329.9
160.998	-60.0352	-329.5
160.998	-60.0355	-329.7
160.998	-60.0358	-329.8
160.998	-60.0359	-330.1
160.998	-60.0359	-329.3
160.999	-60.0366	-329.8
160.999	-60.0365	-329.1
160.999	-60.0367	-329.9
160.999	-60.0367	-329.7
161	-60.0373	-329.2
161	-60.0373	-329.2
161	-60.0375	-329.4
161	-60.0377	-329.6
161.001	-60.038	-330
161.001	-60.0383	-329.2
161.001	-60.0385	-329.4
161.001	-60.0386	-329.2
161.002	-60.0394	-329.7
161.003	-60.0397	-330.4
161.003	-60.0397	-330.3
161.003	-60.0403	-330.9
161.004	-60.0406	-331.8
161.004	-60.0406	-331.9
161.004	-60.0409	-332.6
161.004	-60.0411	-333.3
161.004	-60.0412	-332.9
161.005	-60.0414	-334.2
161.005	-60.0418	-333.3
161.005	-60.0421	-334
161.005	-60.0421	-334.8
161.006	-60.0423	-335.1
161.006	-60.0425	-334.9
161.006	-60.043	-336.1
161.007	-60.0433	-336.2
161.007	-60.0435	-336.9
161.007	-60.0438	-337.4
161.007	-60.0438	-337.9
161.007	-60.0441	-337.6
161.008	-60.0441	-338.8
161.008	-60.0444	-338.4
161.008	-60.0446	-339.7
161.008	-60.0448	-339.1
161.009	-60.0451	-340.7
161.009	-60.0451	-340
161.009	-60.0455	-341.1
161.009	-60.0456	-341.4
161.01	-60.0459	-341.6
161.01	-60.0461	-342.1
161.01	-60.0463	-341.8
161.01	-60.0464	-342.8
161.01	-60.0465	-342.2
161.011	-60.0467	-342.4
161.011	-60.0468	-342.8
161.011	-60.0471	-342.8
161.011	-60.0472	-343.1
161.011	-60.0473	-343.5
161.012	-60.0479	-343.5
161.012	-60.0479	-344.2
161.012	-60.048	-344.1
161.013	-60.0485	-344.4
161.013	-60.0486	-344.7
161.013	-60.049	-345.6
161.014	-60.0493	-345.4
161.014	-60.0493	-345.4
161.014	-60.0495	-345.8
161.014	-60.0497	-346
161.014	-60.0499	-346.7
161.014	-60.0501	-345.9
161.014	-60.0501	-346.9
161.015	-60.0505	-346.5
161.015	-60.0507	-347.3
161.015	-60.0509	-347
161.015	-60.0511	-347.5
161.016	-60.0515	-348.1
161.016	-60.0515	-347.9
161.016	-60.0519	-348.6
161.016	-60.0521	-348.2
161.017	-60.0528	-349.5
161.017	-60.0528	-349.9
161.018	-60.053	-349.8
161.018	-60.0533	-350
161.018	-60.0537	-350.7
161.018	-60.0537	-351.6
161.019	-60.054	-352
161.019	-60.0541	-352.1
161.019	-60.0543	-352.3
161.019	-60.0545	-352.5
161.019	-60.0547	-353.3
161.02	-60.055	-353.8
161.02	-60.0551	-353.6
161.02	-60.0555	-354
161.02	-60.0556	-355.1
161.021	-60.056	-355.6
161.021	-60.0561	-355.4
161.021	-60.0564	-356
161.022	-60.0567	-357.3
161.022	-60.057	-358.2
161.022	-60.057	-357.7
161.022	-60.0574	-358.4
161.023	-60.0578	-358.2
161.023	-60.0579	-358.5
161.023	-60.0581	-358.9
161.023	-60.0584	-359.7
161.023	-60.0584	-359.9
161.024	-60.0587	-360.1
161.024	-60.0588	-360.9
161.024	-60.059	-360.2
161.024	-60.0592	-361.3
161.025	-60.0595	-361.3
161.025	-60.0594	-360.8
161.025	-60.0594	-361.9
161.025	-60.06	-361.1
161.025	-60.06	-362.3
161.025	-60.0601	-361.5
161.026	-60.0605	-362
161.026	-60.0606	-362.5
161.026	-60.0608	-361.9
161.026	-60.061	-362.7
161.026	-60.061	-362.9
161.026	-60.0611	-362
161.027	-60.0617	-363.5
161.028	-60.0622	-364.3
161.028	-60.0624	-364.3
161.028	-60.0627	-364.5
161.028	-60.0627	-364.7
161.028	-60.0627	-365.3
161.029	-60.0632	-365
161.029	-60.0633	-365.3
161.029	-60.0633	-365.8
161.029	-60.0636	-365.6
161.029	-60.0638	-365.9
161.029	-60.0638	-365.3
161.03	-60.0643	-366.2
161.03	-60.0645	-365.6
161.03	-60.0644	-366.6
161.031	-60.0651	-367.3
161.031	-60.0655	-367.4
161.032	-60.0657	-367.2
161.032	-60.066	-367.4
161.032	-60.066	-367.9
161.032	-60.0662	-368.1
161.033	-60.0665	-368.3
161.033	-60.0665	-368.6
161.033	-60.0666	-369.4
161.033	-60.067	-368.7
161.033	-60.0671	-370.2
161.033	-60.0674	-369.5
161.033	-60.0674	-370.2
161.034	-60.0677	-370.5
161.034	-60.0682	-370.4
161.035	-60.0687	-372.1
161.035	-60.069	-371.9
161.035	-60.0691	-372.4
161.035	-60.0691	-372.3
161.036	-60.0697	-372.2
161.036	-60.0699	-372.6
161.036	-60.0699	-372.7
161.037	-60.0703	-372.8
161.037	-60.0703	-372.8
161.037	-60.0704	-372.3
161.037	-60.0708	-372.6
161.038	-60.071	-372.5
161.038	-60.0712	-373.1
161.038	-60.0714	-373.2
161.039	-60.0718	-374.2
161.039	-60.072	-372.6
161.039	-60.0723	-373.6
161.039	-60.0725	-373.2
161.039	-60.0725	-374.1
161.04	-60.0729	-373.5
161.04	-60.0729	-373.7
161.04	-60.0731	-373.5
161.04	-60.0731	-374
161.04	-60.0735	-373.4
161.041	-60.0736	-373.9
161.041	-60.0738	-372.9
161.041	-60.074	-373.6
161.041	-60.0741	-373.1
161.043	-60.0753	-373.1
161.043	-60.0755	-372.7
161.043	-60.0758	-374.1
161.043	-60.0759	-372.1
161.043	-60.076	-373.9
161.044	-60.0763	-373.1
161.044	-60.0766	-373.8
161.044	-60.0768	-373.3
161.045	-60.0771	-374.5
161.045	-60.0775	-374
161.046	-60.0784	-375.2
161.047	-60.0787	-375
161.046	-60.0786	-375.5
161.046	-60.0786	-375.2
161.047	-60.0792	-375.4
161.047	-60.0794	-375.2
161.048	-60.0797	-376.8
161.048	-60.0798	-376.3
161.048	-60.0798	-377
161.048	-60.0801	-376.9
161.048	-60.0802	-377.3
161.049	-60.0805	-377.6
161.049	-60.0805	-377.2
161.049	-60.0808	-377.5
161.049	-60.0811	-378.1
161.049	-60.0811	-377.5
161.05	-60.0818	-378.3
161.05	-60.0818	-377.4
161.051	-60.0824	-377.7
161.051	-60.0824	-378.2
161.051	-60.0827	-378.5
161.051	-60.0827	-377.8
161.052	-60.083	-378.3
161.052	-60.0832	-378.3
161.052	-60.0834	-378.3
161.052	-60.0835	-377.4
161.052	-60.0837	-378.3
161.053	-60.0839	-377.3
161.053	-60.0844	-377.7
161.054	-60.085	-378.3
161.054	-60.0853	-377.7
161.054	-60.0855	-377.7
161.054	-60.0855	-377.6
161.055	-60.0858	-377.1
161.055	-60.086	-377.9
161.055	-60.0862	-377.4
161.055	-60.0863	-377.6
161.056	-60.0865	-377.7
161.056	-60.0867	-377.3
161.056	-60.0868	-377.1
161.056	-60.087	-378
161.056	-60.0872	-377
161.057	-60.0875	-378
161.057	-60.0877	-377.4
161.058	-60.0882	-376.7
161.058	-60.0883	-378.3
161.058	-60.0885	-377.6
161.058	-60.0888	-378.2
161.059	-60.089	-376.9
161.059	-60.0892	-377.9
161.059	-60.0892	-377.5
161.059	-60.0892	-377.3
161.059	-60.0897	-378.3
161.059	-60.0898	-377.4
161.059	-60.0899	-377.9
161.059	-60.0899	-377.9
161.06	-60.0903	-378.2
161.061	-60.0911	-378.2
161.061	-60.0912	-378.4
161.061	-60.0916	-378.6
161.062	-60.0917	-379
161.062	-60.0919	-379.3
161.062	-60.092	-379.1
161.062	-60.0922	-378.8
161.063	-60.0924	-379.7
161.063	-60.0925	-378.6
161.063	-60.0926	-379.1
161.063	-60.0928	-379
161.063	-60.093	-379.1
161.063	-60.0932	-379.3
161.064	-60.0933	-379.6
161.064	-60.0936	-379.8
161.064	-60.0939	-380.1
161.065	-60.0942	-380.6
161.065	-60.0946	-380.3
161.065	-60.0948	-379.4
161.065	-60.0948	-379.3
161.065	-60.0951	-379.8
161.066	-60.0953	-378.9
161.066	-60.0955	-380
161.066	-60.0956	-379.1
161.066	-60.0958	-379.2
161.066	-60.096	-379.2
161.066	-60.0962	-378.9
161.067	-60.0964	-379.3
161.067	-60.0966	-379.3
161.067	-60.0971	-379.3
161.068	-60.0973	-379.1
161.068	-60.0977	-380.4
161.068	-60.0979	-380.4
161.069	-60.098	-381
161.069	-60.0982	-381.4
161.069	-60.0983	-381.4
161.069	-60.0985	-382
161.069	-60.0987	-381.9
161.07	-60.0988	-381.8
161.07	-60.0989	-382.1
161.07	-60.0992	-382.1
161.071	-60.0997	-381.6
161.071	-60.0998	-382.1
161.071	-60.1003	-382.4
161.072	-60.1008	-381.9
161.072	-60.101	-382.9
161.072	-60.1012	-381.8
161.073	-60.1013	-382.6
161.073	-60.1015	-382.3
161.073	-60.1017	-382.4
161.073	-60.1021	-382.3
161.074	-60.1022	-382.9
161.074	-60.1024	-382.5
161.074	-60.1026	-383.1
161.074	-60.1026	-382.5
161.074	-60.1029	-383.2
161.074	-60.1031	-382.5
161.075	-60.1033	-382.9
161.075	-60.1036	-382.6
161.075	-60.1041	-382.9
161.076	-60.1043	-383.6
161.076	-60.1045	-383.3
161.076	-60.1047	-383.1
161.076	-60.1047	-384.5
161.077	-60.1053	-384.4
161.077	-60.1055	-383.4
161.077	-60.1056	-385.3
161.078	-60.1059	-383.2
161.078	-60.106	-384.8
161.078	-60.1061	-383.7
161.078	-60.1063	-384.3
161.078	-60.1067	-384.3
161.078	-60.1067	-383.9
161.079	-60.1074	-383.5
161.079	-60.1076	-383.6
161.08	-60.1077	-383.7
161.08	-60.1082	-383.7
161.08	-60.1084	-383.1
161.081	-60.1086	-383.6
161.081	-60.1088	-383.8
161.081	-60.1089	-383.7
161.081	-60.1091	-383.9
161.081	-60.1093	-383.5
161.081	-60.1094	-384
161.082	-60.1096	-383.4
161.082	-60.1099	-382.9
161.082	-60.1101	-383.3
161.083	-60.1106	-383
161.083	-60.1109	-382.4
161.083	-60.1112	-383.3
161.084	-60.1114	-382.5
161.084	-60.1116	-382.7
161.084	-60.1117	-383
161.084	-60.1119	-382.7
161.084	-60.112	-383.2
161.085	-60.1121	-382.2
161.085	-60.1124	-383.2
161.085	-60.1126	-383.1
161.085	-60.1127	-383
161.085	-60.1129	-382.7
161.086	-60.1133	-383.1
161.086	-60.1134	-382.7
161.087	-60.1139	-383
161.087	-60.1142	-382.9
161.087	-60.1145	-381.9
161.088	-60.1146	-383.2
161.088	-60.1148	-381.6
161.088	-60.1148	-382.3
161.088	-60.1152	-381.9
161.088	-60.1152	-381.2
161.088	-60.1154	-381.5
161.088	-60.1154	-381.3
161.089	-60.1159	-381.1
161.089	-60.116	-380.7
161.089	-60.1163	-380.9
161.09	-60.1169	-380.8
161.09	-60.1173	-380.5
161.091	-60.1175	-381.1
161.091	-60.1175	-380.1
161.091	-60.1177	-381.1
161.091	-60.1179	-381.3
161.091	-60.1181	-380.4
161.092	-60.1184	-381.1
161.092	-60.1185	-380.8
161.092	-60.1187	-381.2
161.092	-60.1188	-381.2
161.092	-60.1189	-380.6
161.093	-60.1193	-380.9
161.093	-60.1193	-380.5
161.094	-60.1203	-379.1
161.094	-60.1203	-379.1
161.094	-60.1205	-378.4
161.094	-60.1203	-379.2
161.094	-60.1206	-378
161.096	-60.1213	-378.8
161.096	-60.1214	-378
161.096	-60.1216	-378.3
161.097	-60.1224	-377.8
161.097	-60.1225	-377.5
161.097	-60.1226	-378.6
161.097	-60.1229	-377.2
161.098	-60.1231	-377.3
161.098	-60.1231	-377.5
161.098	-60.1234	-376.5
161.098	-60.1235	-376.4
161.098	-60.1237	-376.5
161.099	-60.1239	-375.5
161.099	-60.1243	-375.8
161.099	-60.1246	-375.6
161.1	-60.1248	-374.6
161.1	-60.1251	-374.7
161.101	-60.1258	-373.9
161.101	-60.126	-373.4
161.101	-60.1262	-373.8
161.101	-60.1264	-373.5
161.102	-60.1265	-373
161.102	-60.1267	-372.7
161.102	-60.1268	-372.2
161.102	-60.1272	-371.8
161.103	-60.1274	-371.3
161.103	-60.1275	-371.5
161.103	-60.1276	-370.6
161.103	-60.1279	-370.7
161.104	-60.1282	-369.7
161.104	-60.1284	-369.9
161.104	-60.1289	-368.2
161.105	-60.1292	-369
161.105	-60.1293	-369.1
161.105	-60.1295	-367.7
161.105	-60.1296	-368.6
161.105	-60.1297	-368.1
161.106	-60.1303	-367.9
161.106	-60.1304	-365.7
161.107	-60.1307	-365.3
161.107	-60.131	-365.2
161.107	-60.1312	-364.7
161.108	-60.1315	-364.4
161.108	-60.1321	-363
161.108	-60.1322	-363.3
161.109	-60.1324	-362.3
161.109	-60.1328	-361.6
161.109	-60.1331	-361.7
161.11	-60.1333	-360.4
161.11	-60.1334	-361.2
161.11	-60.1336	-360.7
161.11	-60.1337	-359.7
161.11	-60.1339	-360.5
161.11	-60.134	-359.3
161.111	-60.1343	-359.7
161.111	-60.1345	-359
161.111	-60.1348	-358.2
161.112	-60.1354	-358.1
161.112	-60.1354	-356.7
161.112	-60.1357	-356.7
161.113	-60.136	-355.7
161.113	-60.1362	-355.7
161.113	-60.1364	-355.2
161.113	-60.1365	-355.2
161.114	-60.1367	-354.2
161.114	-60.1368	-354.7
161.114	-60.137	-353.3
161.114	-60.1371	-354
161.114	-60.1374	-353.1
161.114	-60.1374	-352.5
161.115	-60.138	-352
161.116	-60.1388	-350
161.116	-60.1391	-349.5
161.117	-60.1393	-349
161.117	-60.1395	-349.4
161.117	-60.1396	-348.4
161.117	-60.1399	-349
161.117	-60.14	-347.7
161.117	-60.1401	-347.7
161.117	-60.1401	-347.5
161.117	-60.1401	-346.6
161.118	-60.1407	-346.8
161.118	-60.1409	-346.1
161.119	-60.1414	-344.9
161.12	-60.1419	-343.5
161.12	-60.1419	-343.3
161.12	-60.1422	-342.9
161.12	-60.1422	-341.7
161.121	-60.1425	-342.4
161.121	-60.1428	-341
161.121	-60.1429	-340.3
161.121	-60.1429	-340.8
161.122	-60.1433	-339.1
161.122	-60.1434	-339.8
161.122	-60.1435	-338.6
161.122	-60.1437	-338.3
161.122	-60.144	-337.9
161.123	-60.1441	-337.5
161.123	-60.1445	-337.4
161.123	-60.1448	-335.2
161.124	-60.1452	-335.1
161.124	-60.1453	-334.3
161.124	-60.1454	-334.3
161.124	-60.1456	-333.2
161.124	-60.1456	-332.4
161.124	-60.1456	-331.9
161.125	-60.1462	-332.2
161.125	-60.1465	-330.5
161.126	-60.1467	-330.7
161.126	-60.1468	-329.4
161.126	-60.1471	-329
161.127	-60.1474	-327.5
161.127	-60.1481	-326.2
161.127	-60.1481	-325.9
161.128	-60.1485	-324.9
161.128	-60.1486	-324.2
161.128	-60.1486	-323.8
161.128	-60.1486	-323.4
161.129	-60.1491	-322.6
161.129	-60.1494	-322.1
161.129	-60.1494	-321.3
161.129	-60.1496	-321.4
161.129	-60.1499	-320.8
161.13	-60.15	-319.7
161.13	-60.15	-319.9
161.13	-60.1504	-318.9
161.131	-60.1513	-316.4
161.131	-60.1514	-315.3
161.131	-60.1514	-314.6
161.132	-60.1519	-314.1
161.132	-60.1523	-313
161.132	-60.1525	-312.8
161.132	-60.1526	-311.8
161.133	-60.1527	-310.9
161.133	-60.1531	-310
161.134	-60.1536	-307.7
161.134	-60.1536	-307.4
161.135	-60.1542	-306.3
161.135	-60.1542	-305.6
161.135	-60.1546	-305.7
161.135	-60.1547	-304.7
161.135	-60.1549	-304.4
161.135	-60.1551	-303.7
161.136	-60.1554	-302.4
161.136	-60.1558	-302.1
161.136	-60.1559	-301.2
161.136	-60.1559	-301.5
161.136	-60.1559	-300.5
161.137	-60.1565	-300.3
161.138	-60.1571	-298.1
161.138	-60.1575	-296.7
161.138	-60.1578	-295.7
161.139	-60.1579	-295.6
161.139	-60.1582	-294.9
161.139	-60.1583	-294.5
161.14	-60.1586	-293.4
161.14	-60.159	-291.4
161.141	-60.1595	-289.7
161.141	-60.1596	-289.3
161.141	-60.1601	-287.9
161.141	-60.1601	-287.2
161.142	-60.1603	-286.9
161.142	-60.1608	-285.4
161.143	-60.1616	-282.8
161.144	-60.1627	-278.2
161.145	-60.163	-277.1
161.145	-60.1631	-276.2
161.146	-60.1643	-273.1
161.146	-60.1645	-273.2
161.146	-60.1645	-272.5
161.147	-60.1649	-272.4
161.147	-60.165	-271.1
161.147	-60.1652	-271.1
161.147	-60.1652	-270.4
161.148	-60.1656	-269.3
161.148	-60.1658	-269.5
161.148	-60.1661	-268.1
161.148	-60.166	-268.5
161.149	-60.1666	-266.9
161.15	-60.1671	-265.8
161.15	-60.1672	-265
161.15	-60.1672	-265.1
161.15	-60.1676	-264.2
161.15	-60.1677	-264.2
161.15	-60.1677	-264.4
161.151	-60.1681	-262.8
161.151	-60.1683	-263.4
161.151	-60.1685	-262.9
161.151	-60.1686	-262.2
161.151	-60.1688	-261.9
161.152	-60.169	-261.4
161.152	-60.1691	-261.2
161.152	-60.1694	-259.8
161.152	-60.1696	-260
161.153	-60.1703	-257.5
161.154	-60.1705	-256.7
161.154	-60.1708	-255.8
161.154	-60.1709	-255.9
161.154	-60.1712	-254.9
161.155	-60.1713	-254.1
161.155	-60.1715	-254.2
161.155	-60.1717	-253.4
161.155	-60.1718	-252.4
161.155	-60.172	-252.4
161.155	-60.1722	-251.8
161.156	-60.1724	-250.6
161.156	-60.1728	-249.6
161.156	-60.173	-248.3
161.157	-60.1738	-247.4
161.157	-60.1739	-246.2
161.158	-60.1743	-246
161.158	-60.1744	-245.2
161.158	-60.1746	-244.5
161.158	-60.1748	-244.4
161.158	-60.1749	-243.4
161.159	-60.1751	-242.9
161.159	-60.1752	-242.5
161.159	-60.1755	-242.2
161.159	-60.1756	-240.8
161.159	-60.1757	-241.3
161.16	-60.176	-240
161.161	-60.1766	-238.3
161.161	-60.1766	-238.7
161.161	-60.1769	-236.9
161.161	-60.1771	-237.8
161.161	-60.1773	-236.3
161.162	-60.1774	-236.1
161.162	-60.1776	-235.9
161.162	-60.1777	-234.8
161.162	-60.1778	-235.1
161.163	-60.1781	-233.7
161.163	-60.1784	-233.6
161.163	-60.1784	-232.9
161.163	-60.1786	-231.7
161.164	-60.179	-230.6
161.164	-60.179	-230
161.164	-60.1795	-228.4
161.165	-60.1798	-228.2
161.165	-60.1799	-226.4
161.165	-60.1802	-227.2
161.165	-60.1803	-225.3
161.165	-60.1805	-225.4
161.166	-60.1806	-224.8
161.166	-60.1812	-223.2
161.166	-60.1814	-221.4
161.167	-60.1815	-222
161.167	-60.1818	-220.3
161.167	-60.1818	-220.2
161.167	-60.1823	-220.2
161.167	-60.1822	-218.9
161.168	-60.1823	-218.5
161.168	-60.1825	-217.7
161.168	-60.1829	-216.6
161.168	-60.1829	-216.8
161.169	-60.1833	-216.1
161.169	-60.1833	-215
161.17	-60.1839	-214.5
161.17	-60.1841	-213.9
161.17	-60.1842	-213.3
161.17	-60.1844	-213.6
161.17	-60.1846	-213
161.17	-60.1847	-212.6
161.171	-60.1849	-212
161.171	-60.1851	-212.6
161.171	-60.1854	-211.9
161.171	-60.1854	-211.1
161.172	-60.1858	-209.6
161.172	-60.1862	-208.8
161.172	-60.1864	-208.7
161.172	-60.1866	-208.7
161.173	-60.1867	-207.4
161.173	-60.1869	-207.8
161.173	-60.187	-206.7
161.173	-60.1874	-205.8
161.174	-60.1876	-205.2
161.174	-60.1877	-204.8
161.174	-60.1879	-203.9
161.174	-60.1881	-204.2
161.175	-60.1883	-203
161.175	-60.1883	-202.3
161.175	-60.1883	-201.1
161.175	-60.1891	-200.6
161.176	-60.1894	-200.2
161.176	-60.1896	-199.6
161.176	-60.1898	-198.3
161.176	-60.1898	-198.8
161.177	-60.19	-197.7
161.177	-60.1903	-197
161.177	-60.1903	-196.4
161.177	-60.1903	-196
161.177	-60.1903	-195
161.178	-60.1911	-194.9
161.179	-60.1915	-193.6
161.179	-60.1916	-193.5
161.18	-60.1923	-192.2
161.18	-60.1924	-191.5
161.18	-60.1924	-191.2
161.18	-60.1924	-190.8
161.181	-60.1932	-190.3
161.181	-60.1932	-190.1
161.181	-60.1936	-189.7
161.182	-60.1939	-188.4
161.182	-60.1941	-189.9
161.182	-60.1942	-188.2
161.184	-60.1953	-187.5
161.184	-60.1954	-187.1
161.184	-60.1955	-187.5
161.184	-60.1955	-187.1
161.184	-60.1958	-187
161.184	-60.1961	-186.8
161.184	-60.1961	-186.4
161.185	-60.1964	-186.3
161.185	-60.1965	-186.1
161.185	-60.1967	-185.2
161.185	-60.1968	-185.6
161.186	-60.1971	-184.9
161.186	-60.1971	-183.9
161.186	-60.1977	-182.6
161.186	-60.1979	-182.9
161.187	-60.1981	-181
161.187	-60.1985	-179.6
161.187	-60.1986	-179.1
161.188	-60.199	-179
161.188	-60.1991	-177.8
161.188	-60.1993	-177.9
161.188	-60.1995	-177.4
161.189	-60.1996	-176.5
161.189	-60.1997	-177.1
161.189	-60.1999	-176.2
161.189	-60.2001	-176.1
161.189	-60.2003	-175.8
161.19	-60.2004	-175.3
161.19	-60.2005	-175.4
161.19	-60.2008	-174.7
161.19	-60.2008	-175
161.19	-60.2009	-174
161.191	-60.2014	-173.5
161.192	-60.2019	-172.8
161.192	-60.202	-172.3
161.192	-60.2022	-171.1
161.192	-60.2023	-171.8
161.192	-60.2025	-170.5
161.193	-60.2026	-170.4
161.193	-60.2029	-170.4
161.193	-60.2032	-169
161.194	-60.2034	-169.3
161.194	-60.2035	-168.2
161.194	-60.2037	-168.3
161.194	-60.2039	-167.7
161.195	-60.2042	-168
161.196	-60.2051	-166.7
161.196	-60.2052	-165.9
161.196	-60.2053	-166.2
161.196	-60.2054	-165.1
161.196	-60.2058	-165.6
161.197	-60.206	-164
161.197	-60.2062	-165.4
161.197	-60.2064	-164.6
161.197	-60.2065	-163.8
161.198	-60.2068	-164.3
161.198	-60.2068	-164.1
161.198	-60.2071	-163.5
161.198	-60.2074	-162.9
161.199	-60.208	-162.6
161.199	-60.2081	-161.3
161.199	-60.2083	-161.3
161.2	-60.2085	-161.1
161.2	-60.2086	-161
161.2	-60.209	-159.7
161.201	-60.2091	-160.3
161.201	-60.2093	-159.7
161.201	-60.2095	-159.9
161.201	-60.2095	-159.3
161.201	-60.2098	-158.9
161.201	-60.2098	-159.2
161.202	-60.2103	-158.2
161.202	-60.2105	-158.1
161.202	-60.2105	-157.3
161.203	-60.211	-157.6
161.203	-60.2112	-156
161.203	-60.2114	-156.9
161.204	-60.2117	-155.1
161.204	-60.2119	-156.5
161.204	-60.2121	-154.7
161.204	-60.2123	-155.6
161.204	-60.2124	-154.9
161.205	-60.2126	-154.8
161.205	-60.2127	-155
161.205	-60.213	-154.2
161.205	-60.213	-154.3
161.206	-60.2136	-153.9
161.206	-60.2138	-153.4
161.207	-60.2146	-152.6
161.207	-60.2148	-152.6
161.208	-60.2149	-152
161.208	-60.2151	-152
161.208	-60.2152	-151.3
161.208	-60.2154	-151.6
161.208	-60.2156	-151
161.208	-60.2158	-150.4
161.209	-60.216	-150.4
161.209	-60.2161	-149.9
161.209	-60.2162	-150.2
161.209	-60.2165	-149.2
161.21	-60.2167	-148.7
161.21	-60.2167	-148.6
161.21	-60.2172	-147.8
161.211	-60.2174	-147.7
161.211	-60.2175	-147.2
161.211	-60.2176	-147
161.212	-60.2184	-145.4
161.212	-60.2187	-145.4
161.212	-60.2186	-145.1
161.212	-60.2186	-144.3
161.213	-60.2193	-144.1
161.213	-60.2193	-144.2
161.214	-60.2196	-143.5
161.214	-60.2199	-142.5
161.214	-60.2201	-142.9
161.215	-60.2208	-141.5
161.215	-60.2209	-140.5
161.216	-60.2213	-140.4
161.216	-60.2214	-140.3
161.216	-60.2217	-140.3
161.216	-60.2219	-140.6
161.216	-60.222	-139.6
161.217	-60.2223	-139.3
161.217	-60.2225	-139.3
161.217	-60.2227	-139.3
161.217	-60.2228	-138.1
161.218	-60.2229	-138.4
161.218	-60.2231	-137.9
161.218	-60.2233	-137.7
161.219	-60.2238	-136.7
161.219	-60.2239	-136.4
161.22	-60.2244	-134.7
161.22	-60.2246	-134.8
161.22	-60.2248	-135.1
161.22	-60.2249	-133.8
161.221	-60.2251	-134.3
161.221	-60.225	-134.2
161.221	-60.2254	-132.8
161.221	-60.2255	-134.3
161.221	-60.2257	-133.3
161.221	-60.2258	-133.2
161.222	-60.2259	-132.7
161.223	-60.2266	-131.3
161.223	-60.2268	-131.5
161.223	-60.227	-130.6
161.224	-60.2276	-129.9
161.224	-60.2278	-129.2
161.224	-60.228	-129.4
161.224	-60.2281	-128.6
161.224	-60.2283	-128.3
161.225	-60.2284	-128.9
161.225	-60.2287	-127.5
161.225	-60.2289	-128.7
161.226	-60.2291	-127.8
161.226	-60.2291	-127.9
161.226	-60.2293	-128.1
161.227	-60.23	-127.4
161.227	-60.2303	-127
161.228	-60.2307	-128
161.228	-60.2308	-127.5
161.228	-60.2308	-127.7
161.228	-60.2308	-127.7
161.229	-60.2316	-126.5
161.23	-60.232	-127.4
161.23	-60.2322	-127
161.23	-60.2323	-126.4
161.23	-60.2324	-126.3
161.231	-60.2329	-126
161.231	-60.2331	-125
161.231	-60.2334	-124.6
161.232	-60.2338	-123.7
161.232	-60.234	-123.2
161.232	-60.2342	-123.1
161.233	-60.2345	-122
161.233	-60.2346	-122.4
161.233	-60.2348	-121.7
161.233	-60.235	-121.6
161.234	-60.2352	-122.2
161.234	-60.2353	-121.6
161.234	-60.2357	-120.6
161.234	-60.2357	-120.6
161.235	-60.2361	-120
161.236	-60.2368	-119.5
161.236	-60.237	-118.9
161.237	-60.2374	-118.4
161.237	-60.2376	-118.4
161.237	-60.2379	-117.6
161.238	-60.2381	-117.7
161.238	-60.2383	-117.3
161.238	-60.2384	-117.4
161.238	-60.2387	-117.3
161.239	-60.2388	-117.1
161.239	-60.239	-117.3
161.239	-60.2393	-116.2
161.24	-60.2397	-116.4
161.24	-60.2399	-116.4
161.24	-60.24	-115.6
161.24	-60.2401	-115.8
161.241	-60.2403	-115.3
161.241	-60.2405	-115.4
161.241	-60.2406	-115
161.241	-60.2408	-115.6
161.241	-60.2409	-114.6
161.241	-60.2411	-114.6
161.242	-60.2412	-114.5
161.242	-60.2415	-115.2
161.242	-60.2417	-113.8
161.242	-60.2416	-114.3
161.243	-60.2421	-114.2
161.243	-60.2422	-113.8
161.243	-60.2427	-112.9
161.243	-60.2427	-112.9
161.244	-60.243	-112.4
161.244	-60.243	-112
161.244	-60.243	-111
161.244	-60.243	-111.5
161.245	-60.2439	-111.1
161.245	-60.2441	-110.5
161.245	-60.2441	-110.4
161.246	-60.2443	-110.3
161.246	-60.2445	-109.5
161.246	-60.2447	-109.2
161.246	-60.2448	-109.1
161.247	-60.2454	-107.5
161.247	-60.2458	-108.3
161.247	-60.2459	-106.9
161.247	-60.2459	-107.2
161.248	-60.2463	-106.4
161.248	-60.2464	-106.5
161.248	-60.2466	-105.7
161.249	-60.2467	-106.2
161.249	-60.2469	-105.1
161.249	-60.2471	-104.6
161.249	-60.2473	-104.3
161.249	-60.2474	-104.2
161.249	-60.2475	-103.8
161.25	-60.2477	-103
161.25	-60.2479	-103.4
161.251	-60.2485	-102.4
161.251	-60.2488	-101.6
161.252	-60.2491	-102.5
161.252	-60.2491	-101.2
161.252	-60.2494	-102.5
161.252	-60.2497	-101.7
161.252	-60.2497	-101.4
161.253	-60.25	-102.1
161.253	-60.2502	-101.5
161.253	-60.2503	-101.7
161.253	-60.2505	-101.8
161.254	-60.2506	-101.9
161.254	-60.2508	-102.2
161.254	-60.2509	-101.6
161.254	-60.2511	-101.5
161.254	-60.2513	-101.5
161.255	-60.2515	-101.7
161.255	-60.2516	-100.9
161.256	-60.2523	-100.5
161.256	-60.2523	-99.4
161.256	-60.2525	-98.9
161.257	-60.253	-97.9
161.257	-60.2531	-97.8
161.257	-60.2535	-97.1
161.258	-60.2537	-96.5
161.258	-60.2539	-96.4
161.258	-60.254	-95.4
161.258	-60.2542	-95.8
161.259	-60.2544	-95.1
161.259	-60.2544	-94.4
161.259	-60.2549	-93.8
161.26	-60.2551	-94.1
161.26	-60.2553	-94.5
161.26	-60.2554	-93
161.26	-60.2554	-94.1
161.26	-60.2559	-92.3
161.261	-60.2561	-93.4
161.261	-60.2566	-92.7
161.262	-60.2568	-92.3
161.262	-60.2571	-91.8
161.262	-60.2572	-90.9
161.263	-60.2579	-90.3
161.263	-60.2581	-89.5
161.263	-60.2582	-89.3
161.264	-60.2583	-89.4
161.264	-60.2585	-88.7
161.264	-60.2586	-88.4
161.265	-60.2591	-88.1
161.265	-60.2594	-87.3
161.265	-60.2594	-87.6
161.266	-60.2599	-86.7
161.266	-60.2602	-86.7
161.266	-60.2602	-86.3
161.266	-60.2606	-86.3
161.266	-60.261	-87.2
161.267	-60.2611	-86.3
161.267	-60.2612	-86.8
161.267	-60.2615	-86.9
161.267	-60.2615	-85.8
161.267	-60.2617	-86.8
161.268	-60.2626	-85.4
161.268	-60.2628	-84.6
161.269	-60.263	-84.9
161.269	-60.2631	-83.7
161.269	-60.2632	-84.2
161.269	-60.2634	-83.6
161.269	-60.2634	-82.8
161.27	-60.2637	-83.9
161.27	-60.2639	-82.1
161.27	-60.2642	-82.2
161.271	-60.2643	-81.4
161.271	-60.2645	-81.3
161.271	-60.2648	-81.1
161.271	-60.2648	-81.3
161.272	-60.2654	-80.3
161.272	-60.2656	-79.8
161.272	-60.2657	-79.9
161.272	-60.2657	-79.7
161.272	-60.2657	-78.7
161.273	-60.2664	-79.2
161.273	-60.2665	-77.7
161.273	-60.2668	-77.6
161.274	-60.2671	-77.4
161.275	-60.2677	-75.8
161.275	-60.268	-75.7
161.275	-60.2683	-74.3
161.275	-60.2685	-75
161.276	-60.2686	-74.2
161.276	-60.2688	-74.1
161.276	-60.269	-73.5
161.276	-60.2691	-73.5
161.276	-60.2692	-73.2
161.277	-60.2695	-72.9
161.277	-60.2696	-73
161.277	-60.2696	-71.9
161.277	-60.2699	-71.7
161.278	-60.2701	-71.5
161.278	-60.2703	-70.9
161.278	-60.2704	-69.8
161.279	-60.2709	-68.9
161.279	-60.2713	-68.5
161.28	-60.2717	-68.5
161.28	-60.2719	-68
161.28	-60.272	-68
161.28	-60.2722	-67.3
161.28	-60.2724	-67.7
161.28	-60.2724	-65.8
161.281	-60.2728	-65.9
161.281	-60.2729	-65.7
161.281	-60.273	-65.7
161.282	-60.2734	-64.8
161.283	-60.2741	-64.1
161.283	-60.2747	-62.9
161.284	-60.2748	-63.1
161.284	-60.275	-62.4
161.284	-60.275	-61.9
161.284	-60.2751	-62.2
161.284	-60.2753	-61.5
161.285	-60.2755	-61
161.285	-60.2755	-61.7
161.285	-60.2759	-60.3
161.285	-60.2762	-60
161.286	-60.2763	-59.8
161.286	-60.2766	-59.8
161.286	-60.2767	-58.9
161.287	-60.2774	-57.1
161.287	-60.2777	-56.3
161.288	-60.2778	-56
161.288	-60.2779	-55.6
161.288	-60.2781	-55.4
161.288	-60.2783	-55.6
161.288	-60.2784	-54.7
161.288	-60.2786	-54.6
161.289	-60.2791	-53.5
161.289	-60.2794	-53.6
161.29	-60.2794	-52.3
161.29	-60.2796	-53
161.291	-60.2806	-50
161.292	-60.2809	-49.4
161.292	-60.2811	-48.9
161.292	-60.2813	-48.7
161.292	-60.2814	-48.3
161.292	-60.2815	-47.2
161.292	-60.2817	-47.5
161.293	-60.2819	-46.4
161.293	-60.282	-46
161.293	-60.2822	-46.4
161.293	-60.2823	-45.9
161.294	-60.2827	-45.2
161.294	-60.2828	-45.2
161.294	-60.2832	-44.5
161.295	-60.2836	-43.3
161.295	-60.284	-42.3
161.295	-60.284	-42
161.296	-60.2845	-41.2
161.296	-60.2846	-40.8
161.296	-60.2849	-40.5
161.296	-60.2849	-39.8
161.297	-60.2852	-40
161.297	-60.2852	-39.1
161.297	-60.2855	-38.2
161.297	-60.2856	-38.4
161.298	-60.2859	-37.4
161.298	-60.2858	-36.6
161.298	-60.2865	-35.8
161.299	-60.2871	-34.8
161.299	-60.2871	-33.2
161.3	-60.2878	-32.1
161.3	-60.288	-31.9
161.301	-60.2884	-31.6
161.301	-60.2885	-31
161.301	-60.2886	-30.5
161.301	-60.2889	-29.9
161.302	-60.2892	-28.7
161.302	-60.2894	-28.4
161.302	-60.2895	-28.1
161.303	-60.29	-26.4
161.303	-60.2903	-25.5
161.303	-60.2903	-25.4
161.303	-60.2903	-24.5
161.304	-60.2907	-24.6
161.304	-60.2908	-22.9
161.304	-60.2908	-23.3
161.304	-60.2908	-22.8
161.305	-60.2915	-21.6
161.305	-60.2916	-22.3
161.305	-60.2917	-20.9
161.306	-60.2918	-21.5
161.306	-60.292	-20.6
161.306	-60.2923	-19.7
161.307	-60.2928	-19
161.307	-60.293	-18.9
161.307	-60.2933	-17.9
161.307	-60.2934	-18.4
161.308	-60.2937	-17.5
161.308	-60.2938	-17.7
161.308	-60.294	-17.1
161.308	-60.294	-16.4
161.308	-60.2943	-16.4
161.308	-60.2943	-15.4
161.309	-60.2947	-15.5
161.309	-60.2952	-14.4
161.31	-60.2954	-13.4
161.31	-60.2958	-12.6
161.311	-60.2964	-10.9
161.311	-60.2965	-10.7
161.311	-60.2966	-9.7
161.311	-60.2966	-9
161.311	-60.297	-8.6
161.312	-60.2969	-8.5
161.312	-60.2972	-7.3
161.312	-60.2974	-6.8
161.312	-60.2975	-6.4
161.313	-60.2977	-5.2
161.313	-60.2979	-4.8
161.313	-60.2981	-4.9
161.313	-60.2982	-4.1
161.314	-60.2985	-2.5
161.314	-60.2987	-1.9
161.314	-60.2995	-0.4
161.315	-60.2996	0.4
161.315	-60.2998	0.8
161.315	-60.3	2
161.315	-60.3001	1.6
161.315	-60.3003	2.9
161.316	-60.3004	3.1
161.316	-60.3004	3.7
161.316	-60.3008	4.2
161.316	-60.3009	5.1
161.317	-60.3012	6.7
161.317	-60.3014	7.1
161.317	-60.3016	8.6
161.317	-60.3017	7.4
161.318	-60.302	9.4
161.318	-60.3021	11.2
161.318	-60.3023	10.3
161.319	-60.3025	11.4
161.319	-60.3026	12
161.319	-60.3026	13.1
161.319	-60.3029	14
161.32	-60.3031	13.6
161.32	-60.3032	14.3
161.32	-60.3034	15.1
161.32	-60.3035	15.9
161.32	-60.3037	16.5
161.321	-60.3039	17.3
161.321	-60.3039	17.1
161.321	-60.3041	17.9
161.321	-60.3043	18.7
161.322	-60.3044	20.2
161.323	-60.3052	21.7
161.323	-60.3054	23
161.323	-60.3054	23.5
161.323	-60.3058	23.5
161.323	-60.306	24.1
161.324	-60.3064	25.8
161.324	-60.3064	26.4
161.324	-60.3067	26.7
161.324	-60.307	27.3
161.325	-60.3072	28.3
161.325	-60.3073	28.5
161.325	-60.3076	29.3
161.326	-60.3081	32.2
161.326	-60.3081	32.5
161.327	-60.3084	33.2
161.327	-60.3086	34.4
161.327	-60.309	34.8
161.328	-60.3093	36
161.328	-60.3093	36.8
161.328	-60.3095	36.3
161.329	-60.3099	37.3
161.329	-60.3101	38.6
161.329	-60.3106	40.3
161.329	-60.3106	41.4
161.329	-60.3108	41.9
161.33	-60.3111	41.4
161.33	-60.3112	43.9
161.33	-60.3113	43.1
161.331	-60.3118	45.9
161.331	-60.312	46.3
161.331	-60.3121	47.3
161.332	-60.3123	48
161.332	-60.3123	49.2
161.332	-60.3126	49.5
161.332	-60.3128	50.6
161.332	-60.313	52.3
161.333	-60.3132	53.1
161.333	-60.3137	55.6
161.333	-60.3139	55.4
161.334	-60.3144	58
161.334	-60.3146	58.2
161.334	-60.3147	59.5
161.334	-60.3148	60.8
161.335	-60.315	61.2
161.335	-60.3152	61.5
161.335	-60.3152	63
161.335	-60.3152	63.4
161.336	-60.3156	65.3
161.336	-60.3158	65.4
161.336	-60.316	66
161.336	-60.3161	67
161.337	-60.3163	67.5
161.337	-60.3166	68.8
161.337	-60.3168	69.4
161.337	-60.3169	70.6
161.338	-60.3171	73.3
161.338	-60.3171	73.2
161.338	-60.3176	73.7
161.338	-60.3177	74.9
161.338	-60.3177	76.2
161.339	-60.3181	76.5
161.339	-60.3184	76.9
161.34	-60.3186	78
161.34	-60.3188	78.7
161.34	-60.319	79.6
161.34	-60.3191	80.4
161.34	-60.3191	81
161.341	-60.3196	82.2
161.341	-60.3199	83
161.341	-60.3199	84.6
161.342	-60.3204	85.8
161.342	-60.3204	86.3
161.342	-60.3208	87.6
161.343	-60.321	88.7
161.343	-60.3212	88.9
161.343	-60.3213	90.1
161.343	-60.3215	90.9
161.343	-60.3217	91.5
161.344	-60.3218	92.1
161.344	-60.322	93.3
161.344	-60.3221	94
161.344	-60.3225	95.9
161.345	-60.3229	97.9
161.345	-60.3229	97.9
161.345	-60.3229	98.9
161.346	-60.3237	101.6
161.346	-60.3238	102.8
161.346	-60.3239	103.2
161.347	-60.3241	104.7
161.347	-60.3242	104.5
161.347	-60.3243	106.5
161.347	-60.3246	107
161.348	-60.3247	107.9
161.348	-60.3249	108.8
161.348	-60.3253	110.6
161.348	-60.3255	111.4
161.349	-60.3257	112.9
161.349	-60.3261	115.3
161.35	-60.3265	117.6
161.35	-60.3266	119
161.35	-60.3268	119.5
161.351	-60.327	120.5
161.351	-60.3271	120.4
161.351	-60.3273	121.8
161.351	-60.3275	122.7
161.351	-60.3276	123.8
161.352	-60.3277	124.6
161.352	-60.3279	125.5
161.352	-60.3283	126.8
161.352	-60.3283	128.4
161.353	-60.3286	128.9
161.353	-60.3287	130
161.353	-60.3289	130.6
161.353	-60.3291	131.1
161.353	-60.3292	132.5
161.354	-60.3296	134
161.354	-60.3297	134.9
161.354	-60.3298	136.2
161.355	-60.3301	135.9
161.355	-60.3302	137.1
161.355	-60.3304	138.5
161.355	-60.3307	139.7
161.356	-60.3309	141.1
161.356	-60.3311	141.8
161.356	-60.3313	142.1
161.357	-60.3315	142.9
161.357	-60.3316	144.2
161.357	-60.3316	144.8
161.357	-60.332	146.3
161.358	-60.3321	146.9
161.358	-60.3324	148
161.358	-60.3326	148.5
161.359	-60.3329	150.2
161.359	-60.3331	150.8
161.359	-60.3336	152.6
161.36	-60.3339	154.8
161.36	-60.3339	154.5
161.36	-60.3341	155.2
161.36	-60.3344	156.3
161.36	-60.3345	156.3
161.361	-60.3346	158.6
161.361	-60.335	159.1
161.361	-60.3351	159.9
161.362	-60.3353	160.3
161.363	-60.3361	164.4
161.363	-60.3362	163.8
161.363	-60.3363	165.5
161.363	-60.3364	165.3
161.363	-60.3364	166.3
161.364	-60.3369	167.2
161.364	-60.337	166.9
161.364	-60.3372	168.2
161.364	-60.3374	168.3
161.364	-60.3375	169.2
161.365	-60.3379	169.4
161.365	-60.3382	170.9
161.365	-60.3383	171.7
161.366	-60.3388	174.8
161.366	-60.3388	174.6
161.366	-60.3391	175
161.366	-60.3393	176.6
161.367	-60.3394	176.3
161.367	-60.3395	177.3
161.367	-60.3397	178
161.367	-60.3398	178.1
161.367	-60.3398	179.3
161.368	-60.3399	179.1
161.368	-60.3399	180.4
161.369	-60.3406	181.7
161.369	-60.3407	182
161.369	-60.3407	182.4
161.37	-60.3414	184.4
161.37	-60.3416	183.6
161.37	-60.3417	185.1
161.37	-60.3419	184.9
161.371	-60.3421	185.4
161.371	-60.3422	186.2
161.371	-60.3424	186
161.371	-60.3426	187.2
161.371	-60.3427	186.5
161.371	-60.3429	187.4
161.372	-60.3431	188
161.372	-60.3431	188.9
161.372	-60.3434	188.8
161.373	-60.344	191.3
161.373	-60.3444	192.4
161.373	-60.3445	193
161.374	-60.3447	193.4
161.374	-60.3446	193.4
161.374	-60.345	194.2
161.374	-60.3451	193.5
161.374	-60.3451	195.3
161.375	-60.3454	194.3
161.375	-60.3455	195.5
161.375	-60.3456	195.7
161.375	-60.3456	195.9
161.376	-60.346	196
161.376	-60.3461	196.3
161.376	-60.3466	196.9
161.377	-60.3467	197.6
161.377	-60.3468	197.1
161.377	-60.3474	197.2
161.378	-60.3475	198.9
161.378	-60.3477	197.9
161.378	-60.348	198.7
161.378	-60.3481	198.2
161.379	-60.3483	199.4
161.379	-60.3484	199.1
161.379	-60.3486	199.4
161.379	-60.3488	200.4
161.38	-60.3491	201
161.38	-60.3497	201.9
161.38	-60.3498	202
161.381	-60.3501	202.9
161.381	-60.3503	203.6
161.381	-60.3504	202.9
161.382	-60.3506	203.2
161.382	-60.3507	203.4
161.382	-60.3509	203.8
161.382	-60.351	204
161.382	-60.3512	204.5
161.383	-60.3513	204.7
161.383	-60.3517	205.1
161.383	-60.3518	204.8
161.383	-60.3519	205.4
161.384	-60.3521	205.3
161.384	-60.3523	205.8
161.384	-60.3526	205.4
161.384	-60.3527	206.2
161.385	-60.3529	205.8
161.385	-60.353	206.5
161.385	-60.3532	206.3
161.385	-60.3534	206.9
161.386	-60.3535	206.5
161.386	-60.3536	206.8
161.386	-60.3538	206.9
161.387	-60.3543	207.9
161.387	-60.3544	207
161.387	-60.3546	208.4
161.387	-60.3548	207.4
161.387	-60.355	208
161.388	-60.3551	207.8
161.388	-60.3555	208.2
161.388	-60.3557	208.6
161.389	-60.3561	208.8
161.389	-60.3562	209
161.389	-60.3565	208.4
161.39	-60.3569	208.9
161.39	-60.3572	209.3
161.391	-60.3573	208.5
161.391	-60.3574	209.2
161.391	-60.3576	209.1
161.391	-60.3578	209.2
161.391	-60.358	209.2
161.392	-60.3582	208.8
161.392	-60.3583	209
161.392	-60.3585	209.1
161.392	-60.3586	209.3
161.392	-60.3587	208.8
161.393	-60.3593	208.5
161.393	-60.3594	209.8
161.393	-60.3595	208.9
161.394	-60.3597	209.1
161.394	-60.3599	209.5
161.394	-60.3599	208.9
161.394	-60.36	208.9
161.394	-60.3603	209.6
161.395	-60.3605	209.1
161.395	-60.3606	208.9
161.395	-60.3608	209.8
161.395	-60.361	208.9
161.396	-60.3612	208.9
161.396	-60.3612	209.5
161.396	-60.3615	209.7
161.396	-60.3616	209.3
161.396	-60.3617	209.4
161.397	-60.3622	209.1
161.397	-60.3623	209.2
161.397	-60.3625	209.4
161.398	-60.3627	209.2
161.398	-60.3629	209.3
161.398	-60.363	209.3
161.398	-60.3631	209
161.398	-60.3633	209.4
161.399	-60.3634	209.1
161.399	-60.3634	209.7
161.399	-60.3634	208.7
161.399	-60.3634	210.1
161.4	-60.3642	209.2
161.4	-60.3642	209.1
161.401	-60.3649	209.1
161.401	-60.3653	208.8
161.401	-60.3654	209.7
161.401	-60.3656	207.4
161.402	-60.3657	209.8
161.402	-60.3659	208.4
161.402	-60.366	208.5
161.402	-60.3663	208.1
161.403	-60.3665	207.7
161.403	-60.3666	209.3
161.403	-60.3668	207.9
161.403	-60.3668	209
161.404	-60.3671	208.7
161.404	-60.3675	208.1
161.405	-60.3679	208.3
161.405	-60.3681	208.3
161.405	-60.3683	208.6
161.405	-60.3684	207.7
161.406	-60.3685	208.7
161.406	-60.3687	208.1
161.406	-60.3687	208.1
161.406	-60.369	208.2
161.407	-60.3692	207.9
161.407	-60.3694	208
161.407	-60.3695	207.3
161.407	-60.3697	208.5
161.408	-60.3702	207.1
161.408	-60.3704	206
161.408	-60.3704	206.9
161.409	-60.3712	206.1
161.409	-60.3713	206
161.409	-60.3715	205.4
161.41	-60.3717	206.3
161.41	-60.3719	204.7
161.41	-60.3721	205.7
161.41	-60.3722	204.6
161.41	-60.3724	205
161.41	-60.3724	204.5
161.412	-60.3735	203.5
161.412	-60.3736	202.8
161.412	-60.3737	202.6
161.413	-60.374	201.9
161.413	-60.3741	201.2
161.413	-60.3742	201
161.414	-60.3745	201.4
161.414	-60.3746	199.8
161.414	-60.3748	200.6
161.414	-60.3749	199.4
161.414	-60.3749	198.9
161.415	-60.3752	198.5
161.415	-60.3754	198.2
161.415	-60.3756	198.6
161.416	-60.376	197.7
161.416	-60.376	197.2
161.416	-60.3762	196.1
161.417	-60.3763	196.3
161.417	-60.3766	195.2
161.418	-60.3769	194.6
161.418	-60.377	193.2
161.418	-60.377	193.4
161.418	-60.3773	193.4
161.419	-60.3774	192.7
161.419	-60.3776	191.9
161.419	-60.3778	190.8
161.419	-60.378	190.9
161.42	-60.3782	189.9
161.42	-60.3784	189.5
161.42	-60.3785	187.2
161.42	-60.3788	186.6
161.421	-60.379	185.6
161.421	-60.3791	184.8
161.421	-60.3795	183.9
161.421	-60.3795	182.7
161.422	-60.3798	182.7
161.422	-60.3799	181.9
161.422	-60.3804	180.3
161.423	-60.3805	180.3
161.423	-60.3807	179.9
161.423	-60.3808	179.3
161.423	-60.381	178.4
161.423	-60.3811	177.6
161.424	-60.3813	177.8
161.424	-60.3815	176.4
161.424	-60.3815	176.6
161.424	-60.3818	175.4
161.424	-60.3818	174.2
161.425	-60.3824	172.9
161.425	-60.3826	172.9
161.425	-60.3828	171.1
161.426	-60.3831	171.1
161.426	-60.3832	169.8
161.426	-60.3834	169.4
161.426	-60.3835	169.6
161.426	-60.3837	167.8
161.426	-60.3837	168.5
161.427	-60.384	165.9
161.427	-60.3841	165.9
161.427	-60.3842	164.2
161.428	-60.3846	162.8
161.428	-60.3847	161
161.428	-60.3849	160.7
161.429	-60.3855	155.8
161.429	-60.3857	154.7
161.429	-60.3858	153.6
161.43	-60.386	152
161.43	-60.386	151.2
161.43	-60.3863	149.8
161.43	-60.3863	148.2
161.43	-60.3866	146.6
161.431	-60.3868	145.8
161.431	-60.3869	143.9
161.431	-60.3871	142.4
161.431	-60.3873	141
161.431	-60.3873	139.1
161.431	-60.3873	138.3
161.431	-60.3873	135.2
161.433	-60.3883	130.6
161.433	-60.3884	127.4
161.433	-60.3884	126.5
161.433	-60.3887	124.5
161.433	-60.389	122.7
161.434	-60.3891	120.7
161.434	-60.3894	119.2
161.434	-60.3895	117.8
161.434	-60.3896	115.3
161.434	-60.3898	113.8
161.435	-60.3899	111.3
161.435	-60.3902	109.9
161.435	-60.3903	108.3
161.435	-60.3907	103.6
161.437	-60.3915	93.8
161.437	-60.3916	89.9
161.437	-60.3918	89.2
161.437	-60.3918	87.1
161.437	-60.3921	84.3
161.438	-60.3923	83
161.438	-60.3923	81
161.438	-60.3924	79.2
161.438	-60.3927	76.7
161.438	-60.3929	76.1
161.439	-60.3931	73.6
161.439	-60.3936	67.4
161.439	-60.3938	64
161.44	-60.3939	63.6
161.44	-60.3942	58.7
161.44	-60.3943	56.6
161.441	-60.3947	52.1
161.441	-60.3949	49.6
161.441	-60.395	48.5
161.441	-60.3952	45.5
161.441	-60.3954	43.4
161.442	-60.3955	41.1
161.442	-60.3956	39
161.442	-60.3957	36.8
161.442	-60.3961	32
161.442	-60.3961	30.7
161.443	-60.3965	28.1
161.443	-60.3966	26.1
161.444	-60.3974	14.5
161.444	-60.3974	12.5
161.445	-60.3976	10
161.445	-60.3977	8.4
161.445	-60.3978	5.8
161.445	-60.3978	3.7
161.446	-60.3982	1.1
161.446	-60.3983	-1.3
161.446	-60.3985	-6.2
161.447	-60.3988	-7.5
161.447	-60.399	-11.7
161.447	-60.3991	-12.5
161.447	-60.3994	-19.3
161.448	-60.3997	-21.7
161.448	-60.4002	-29.1
161.449	-60.4004	-30.7
161.449	-60.4005	-33.8
161.449	-60.4006	-34.8
161.449	-60.4008	-38.1
161.449	-60.401	-40
161.45	-60.4013	-44.9
161.45	-60.4015	-46.7
161.45	-60.4016	-48.8
161.45	-60.4018	-51.4
161.45	-60.402	-53.1
161.451	-60.4021	-55.4
161.451	-60.4025	-62.6
161.451	-60.4027	-64.7
161.452	-60.4032	-71.8
161.452	-60.4034	-73.3
161.452	-60.4035	-75.1
161.452	-60.4037	-78.6
161.453	-60.404	-81.1
161.453	-60.4042	-86.4
161.453	-60.4044	-88.7
161.454	-60.4046	-90.4
161.454	-60.4048	-93.3
161.454	-60.4049	-94.9
161.454	-60.4051	-97
161.454	-60.4052	-99.4
161.455	-60.4059	-109.6
161.455	-60.4062	-111.9
161.456	-60.4065	-117.6
161.456	-60.4068	-119.7
161.456	-60.4069	-122.2
161.456	-60.4072	-123.5
161.457	-60.4073	-125.7
161.457	-60.4075	-128
161.457	-60.4076	-128.8
161.457	-60.4078	-132.1
161.457	-60.4079	-132.9
161.457	-60.4081	-135.5
161.458	-60.4083	-136.2
161.458	-60.4085	-139.8
161.459	-60.4093	-148.6
161.459	-60.4094	-151.4
161.46	-60.4096	-151.5
161.46	-60.4096	-154.2
161.46	-60.4099	-155.4
161.46	-60.41	-157.2
161.46	-60.41	-159.1
161.461	-60.4103	-160.8
161.461	-60.4105	-161.9
161.461	-60.4105	-163.7
161.461	-60.4107	-164.7
161.461	-60.4107	-167.3
161.461	-60.4111	-168.1
161.462	-60.4112	-169.4
161.462	-60.4113	-170.7
161.462	-60.4118	-174.9
161.463	-60.4124	-179.1
161.463	-60.4124	-179.6
161.463	-60.4125	-182.6
161.463	-60.4129	-182.9
161.463	-60.4129	-184.1
161.464	-60.4131	-186.1
161.464	-60.4134	-186.6
161.464	-60.4134	-188.5
161.464	-60.4137	-189.1
161.464	-60.4137	-190.7
161.465	-60.414	-191.5
161.465	-60.4144	-195.2
161.466	-60.4149	-197.4
161.466	-60.415	-199.1
161.466	-60.4151	-199.3
161.466	-60.4154	-200.8
161.467	-60.4156	-202.7
161.467	-60.4158	-204.4
161.467	-60.416	-204.9
161.467	-60.4161	-205.8
161.467	-60.4162	-206.9
161.467	-60.4162	-207
161.468	-60.4168	-208.4
161.468	-60.4171	-210.5
161.468	-60.4171	-211.8
161.469	-60.4174	-211.7
161.469	-60.4179	-213.9
161.469	-60.4179	-214.2
161.469	-60.4181	-215.5
161.47	-60.4182	-214.5
161.47	-60.4184	-216
161.47	-60.4184	-216.9
161.47	-60.4188	-216.4
161.471	-60.4189	-218
161.471	-60.419	-217.7
161.471	-60.4192	-218.8
161.471	-60.4195	-219.8
161.472	-60.4196	-220.3
161.472	-60.4197	-220.5
161.472	-60.42	-220.8
161.472	-60.42	-221.8
161.473	-60.4204	-222.4
161.473	-60.4208	-222.6
161.473	-60.4209	-222.1
161.473	-60.421	-222.8
161.474	-60.4212	-223.3
161.474	-60.4213	-222.3
161.474	-60.4213	-223.8
161.474	-60.4218	-223.1
161.475	-60.4222	-223.6
161.475	-60.4222	-223.8
161.475	-60.4226	-223.8
161.475	-60.4227	-223.6
161.476	-60.423	-223.9
161.476	-60.4236	-223.8
161.476	-60.4238	-223
161.477	-60.424	-223.3
161.477	-60.4242	-223.2
161.477	-60.4244	-222.7
161.477	-60.4244	-222.8
161.478	-60.4248	-221.7
161.478	-60.4249	-222
161.478	-60.4251	-220.9
161.478	-60.4253	-220.7
161.478	-60.4253	-220.6
161.479	-60.4255	-220.4
161.479	-60.4257	-220.3
161.479	-60.4259	-220.3
161.48	-60.4265	-218.1
161.48	-60.4265	-218.1
161.48	-60.4266	-216.9
161.481	-60.4269	-217.2
161.481	-60.4271	-215.3
161.481	-60.4272	-216.4
161.481	-60.4274	-214.6
161.481	-60.4274	-214.5
161.481	-60.4274	-213.9
161.482	-60.4277	-213.3
161.482	-60.4278	-212.3
161.482	-60.4278	-211.8
161.482	-60.4283	-210.7
161.482	-60.4283	-210.3
161.483	-60.4287	-209
161.483	-60.4292	-206.8
161.483	-60.4293	-205.5
161.484	-60.4294	-205.4
161.484	-60.4299	-202
161.484	-60.4301	-201.4
161.485	-60.4302	-199.8
161.485	-60.4304	-199.3
161.485	-60.4306	-197.4
161.485	-60.4307	-196.5
161.486	-60.431	-195.6
161.486	-60.4311	-194.9
161.486	-60.4311	-192.6
161.486	-60.4316	-191.6
161.486	-60.4316	-190.7
161.486	-60.4316	-189.6
161.487	-60.4324	-185.7
161.487	-60.4324	-184
161.488	-60.4327	-183
161.488	-60.433	-181.9
161.488	-60.433	-180.8
161.488	-60.433	-179.5
161.489	-60.4333	-178.7
161.489	-60.4333	-177.5
161.489	-60.4333	-176.3
161.489	-60.4339	-174.3
161.49	-60.434	-174.9
161.49	-60.4341	-172
161.49	-60.4343	-170.2
161.49	-60.4346	-169
161.491	-60.435	-165.2
161.491	-60.435	-164.6
161.491	-60.4354	-162.6
161.491	-60.4355	-163
161.491	-60.4355	-160
161.492	-60.4358	-159.8
161.492	-60.4358	-158
161.492	-60.4358	-156.9
161.493	-60.4365	-153.6
161.493	-60.4365	-152.8
161.493	-60.4367	-150.9
161.493	-60.4367	-150.2
161.493	-60.4369	-147.9
161.494	-60.4375	-144.7
161.494	-60.4377	-141.1
161.495	-60.4378	-140.6
161.495	-60.4379	-138.3
161.495	-60.4379	-137.3
161.495	-60.4379	-136.4
161.496	-60.4386	-134.7
161.496	-60.4387	-132.4
161.496	-60.4387	-132.5
161.496	-60.439	-130.7
161.496	-60.4392	-130.4
161.497	-60.4394	-128.6
161.497	-60.4395	-128.2
161.497	-60.4397	-126.4
161.497	-60.4399	-124.1
161.497	-60.4401	-123.4
161.498	-60.4403	-121.7
161.498	-60.441	-116.9
161.498	-60.441	-116.2
161.499	-60.4412	-114.2
161.499	-60.4412	-113
161.499	-60.4416	-109.8
161.499	-60.4418	-109.4
161.499	-60.4419	-106.3
161.5	-60.4421	-104.6
161.5	-60.4423	-103.2
161.5	-60.4425	-99.3
161.501	-60.4427	-97.5
161.501	-60.4428	-94.5
161.501	-60.4432	-90.6
161.502	-60.4437	-84.3
161.502	-60.4437	-84
161.502	-60.4439	-79.8
161.502	-60.4441	-79.5
161.503	-60.4442	-76.1
161.503	-60.4444	-74.8
161.503	-60.4446	-72.1
161.503	-60.4447	-70.2
161.503	-60.4447	-67.5
161.504	-60.4451	-66.2
161.504	-60.4451	-63.6
161.504	-60.4453	-62.1
161.504	-60.4453	-59.3
161.505	-60.4457	-58.4
161.505	-60.4457	-56
161.505	-60.4461	-53.4
161.505	-60.4463	-51.5
161.506	-60.4467	-48.1
161.506	-60.4468	-46.5
161.506	-60.447	-45.4
161.506	-60.4472	-43.9
161.507	-60.4474	-42.9
161.507	-60.4475	-41.3
161.507	-60.4476	-40.3
161.507	-60.4479	-37.3
161.508	-60.4482	-36
161.508	-60.4483	-35.1
161.508	-60.4485	-33.2
161.508	-60.4486	-32.2
161.508	-60.4489	-31.5
161.509	-60.4489	-29.8
161.509	-60.4493	-27.9
161.51	-60.4499	-22.5
161.51	-60.4502	-22.3
161.511	-60.4504	-21.5
161.511	-60.4507	-20.1
161.511	-60.4508	-18.2
161.511	-60.4508	-17.6
161.511	-60.4508	-16.6
161.512	-60.4513	-16.1
161.512	-60.4514	-14.9
161.512	-60.4516	-14.6
161.513	-60.4518	-13
161.513	-60.4523	-10
161.514	-60.4527	-7.2
161.514	-60.453	-7.2
161.514	-60.4531	-5.4
161.514	-60.4534	-3.6
161.515	-60.4536	-3.1
161.515	-60.4538	-1.7
161.515	-60.4538	-1.3
161.515	-60.454	0.3
161.515	-60.4543	-0.3
161.516	-60.4546	2.1
161.516	-60.4547	3.5
161.516	-60.455	4.1
161.516	-60.4551	5.4
161.517	-60.4552	6.3
161.518	-60.4561	9.8
161.518	-60.4563	9.9
161.518	-60.4564	10.7
161.519	-60.4567	11.5
161.519	-60.4569	12.8
161.519	-60.457	13.2
161.519	-60.4572	13.5
161.52	-60.4573	14.1
161.52	-60.4574	14.8
161.52	-60.4576	14
161.52	-60.4578	15.8
161.521	-60.4582	16
161.522	-60.459	17.6
161.522	-60.4592	18.3
161.522	-60.4592	19
161.522	-60.4594	18.8
161.522	-60.4596	19.7
161.523	-60.4597	20.2
161.523	-60.4599	19.7
161.523	-60.4599	21.2
161.523	-60.4599	20.9
161.523	-60.4604	21.7
161.524	-60.4605	20.7
161.524	-60.4608	21.7
161.524	-60.4608	20.9
161.525	-60.4618	21.8
161.526	-60.462	21.1
161.526	-60.462	21.5
161.526	-60.4622	21.4
161.526	-60.4624	20.2
161.527	-60.4628	20.6
161.527	-60.463	19.7
161.527	-60.4631	19.1
161.527	-60.4634	19.3
161.528	-60.4636	18.6
161.528	-60.4636	18.5
161.528	-60.4638	18.1
161.528	-60.4642	17.6
161.529	-60.4643	17.4
161.529	-60.4645	17.1
161.529	-60.465	16.1
[truncated: 19,001 more rows]

## Sheet: Line4
Longitude	Latitude	Mag Anomaly (nT)
166.796	-61.3866	168.2
166.796	-61.3868	162.4
166.796	-61.387	159.2
166.797	-61.3872	159
166.797	-61.3874	152.5
166.798	-61.3876	152.4
166.798	-61.3878	152.9
166.798	-61.388	151.7
166.799	-61.3882	152.4
166.799	-61.3884	152
166.8	-61.3886	151.2
166.8	-61.3888	150.3
166.801	-61.389	152.4
166.801	-61.3892	152
166.801	-61.3894	149.3
166.802	-61.3895	148.7
166.802	-61.3897	142.9
166.803	-61.3899	140.9
166.803	-61.3901	139.9
166.804	-61.3903	141.9
166.804	-61.3905	141.1
166.804	-61.3907	138.3
166.805	-61.3909	138
166.805	-61.3911	132.3
166.806	-61.3913	130.9
166.806	-61.3915	130.4
166.806	-61.3917	133.8
166.807	-61.3919	130.3
166.807	-61.3921	131.2
166.808	-61.3923	130.7
166.808	-61.3925	132.4
166.809	-61.3926	130.4
166.809	-61.3928	130.2
166.809	-61.393	130
166.81	-61.3932	129.9
166.81	-61.3934	128.1
166.811	-61.3936	129.4
166.811	-61.3938	130.1
166.812	-61.394	130.9
166.812	-61.3942	130.4
166.812	-61.3944	124.1
166.813	-61.3946	121
166.813	-61.3948	120.6
166.814	-61.395	120.5
166.814	-61.3952	123
166.814	-61.3954	129.4
166.815	-61.3956	130.6
166.815	-61.3957	134
166.816	-61.3959	130.9
166.816	-61.3961	131.1
166.817	-61.3963	132.6
166.817	-61.3965	130.5
166.817	-61.3967	131.3
166.818	-61.3969	133.4
166.818	-61.3971	131.5
166.819	-61.3973	133.7
166.819	-61.3975	132
166.82	-61.3977	130.4
166.82	-61.3979	129
166.82	-61.3981	129.9
166.821	-61.3983	131
166.821	-61.3985	130.4
166.822	-61.3987	128.9
166.822	-61.3988	124.1
166.822	-61.399	121.3
166.823	-61.3992	123.8
166.823	-61.3994	120.9
166.824	-61.3996	121.3
166.824	-61.3998	122.1
166.825	-61.4	123.5
166.825	-61.4002	121.3
166.825	-61.4004	122.2
166.826	-61.4006	129.2
166.826	-61.4008	129.7
166.827	-61.401	133.8
166.827	-61.4012	134.2
166.828	-61.4014	132.6
166.828	-61.4016	131.8
166.828	-61.4017	131.7
166.829	-61.4019	134.6
166.829	-61.4021	132.6
166.83	-61.4023	131.5
166.83	-61.4025	124.3
166.83	-61.4027	123.3
166.831	-61.4029	121.6
166.831	-61.4031	124.9
166.832	-61.4033	123.9
166.832	-61.4035	122
166.833	-61.4037	114.5
166.833	-61.4039	113
166.833	-61.4041	113.3
166.834	-61.4043	114.9
166.834	-61.4045	113.2
166.835	-61.4047	111.5
166.835	-61.4048	111.2
166.835	-61.405	111.3
166.836	-61.4052	114.7
166.836	-61.4054	112.2
166.837	-61.4056	111
166.837	-61.4058	103.9
166.838	-61.406	105
166.838	-61.4062	103.3
166.838	-61.4064	94.5
166.839	-61.4066	93.6
166.839	-61.4068	93.6
166.84	-61.407	91.2
166.84	-61.4072	89.6
166.841	-61.4074	83.4
166.841	-61.4076	82
166.841	-61.4078	83.6
166.842	-61.4079	82
166.842	-61.4081	79.8
166.843	-61.4083	75.2
166.843	-61.4085	74.7
166.843	-61.4087	79.6
166.844	-61.4089	75
166.844	-61.4091	79.5
166.845	-61.4093	73.5
166.845	-61.4095	75.2
166.846	-61.4097	79.7
166.846	-61.4099	82.2
166.846	-61.4101	82.1
166.847	-61.4103	82.3
166.847	-61.4105	75.3
166.848	-61.4107	72.6
166.848	-61.4109	70.1
166.849	-61.411	63.2
166.849	-61.4112	52.9
166.849	-61.4114	45
166.85	-61.4116	45
166.85	-61.4118	34.8
166.851	-61.412	32.1
166.851	-61.4122	31.8
166.851	-61.4124	25.5
166.852	-61.4126	25.8
166.852	-61.4128	24.7
166.853	-61.413	22.1
166.853	-61.4132	20
166.854	-61.4134	13.4
166.854	-61.4136	10.9
166.854	-61.4138	4.1
166.855	-61.414	2.2
166.855	-61.4141	2.6
166.856	-61.4143	3.1
166.856	-61.4145	4.8
166.857	-61.4147	10.2
166.857	-61.4149	10.7
166.857	-61.4151	3.4
166.858	-61.4153	4.3
166.858	-61.4155	-5.7
166.859	-61.4157	-8
166.859	-61.4159	-9.3
166.859	-61.4161	-17.1
166.86	-61.4163	-14.6
166.86	-61.4165	-14.3
166.861	-61.4167	-15.9
166.861	-61.4169	-25.2
166.862	-61.4171	-24.6
166.862	-61.4172	-29.7
166.862	-61.4174	-35.4
166.863	-61.4176	-33.8
166.863	-61.4178	-37.9
166.864	-61.418	-44
166.864	-61.4182	-45
166.865	-61.4184	-45.3
166.865	-61.4186	-54.2
166.865	-61.4188	-56
166.866	-61.419	-56.1
166.866	-61.4192	-58.4
166.867	-61.4194	-66.5
166.867	-61.4196	-68
166.867	-61.4198	-74.9
166.868	-61.42	-74.6
166.868	-61.4202	-77.9
166.869	-61.4203	-86.6
166.869	-61.4205	-88.3
166.87	-61.4207	-93.6
166.87	-61.4209	-93.7
166.87	-61.4211	-93.6
166.871	-61.4213	-88.3
166.871	-61.4215	-86.9
166.872	-61.4217	-88.8
166.872	-61.4219	-94
166.872	-61.4221	-95.8
166.873	-61.4223	-93.4
166.873	-61.4225	-96.9
166.874	-61.4227	-103.9
166.874	-61.4229	-103.7
166.875	-61.4231	-105.7
166.875	-61.4233	-114.3
166.875	-61.4234	-116
166.876	-61.4236	-117.2
166.876	-61.4238	-118.8
166.877	-61.424	-123.2
166.877	-61.4242	-124.9
166.878	-61.4244	-128.4
166.878	-61.4246	-135.7
166.878	-61.4248	-134.8
166.879	-61.425	-138.4
166.879	-61.4252	-146.6
166.88	-61.4254	-147
166.88	-61.4256	-154.8
166.88	-61.4258	-153.2
166.881	-61.426	-156.6
166.881	-61.4262	-158.7
166.882	-61.4264	-164.6
166.882	-61.4265	-162.8
166.883	-61.4267	-164.5
166.883	-61.4269	-168
166.883	-61.4271	-173
166.884	-61.4273	-176.6
166.884	-61.4275	-173.9
166.885	-61.4277	-177.8
166.885	-61.4279	-182.9
166.886	-61.4281	-184.4
166.886	-61.4283	-184.5
166.886	-61.4285	-183.7
166.887	-61.4287	-186
166.887	-61.4289	-185.9
166.888	-61.4291	-183.7
166.888	-61.4293	-183.4
166.888	-61.4295	-185.9
166.889	-61.4296	-185.6
166.889	-61.4298	-185.6
166.89	-61.43	-184.2
166.89	-61.4302	-185.8
166.891	-61.4304	-185.7
166.891	-61.4306	-182.9
166.891	-61.4308	-183.6
166.892	-61.431	-183.6
166.892	-61.4312	-182.7
166.893	-61.4314	-182.8
166.893	-61.4316	-182.7
166.894	-61.4318	-183.2
166.894	-61.432	-183.4
166.894	-61.4322	-184.2
166.895	-61.4324	-184.8
166.895	-61.4325	-185.9
166.896	-61.4327	-183.5
166.896	-61.4329	-186.2
166.896	-61.4331	-186.9
166.897	-61.4333	-193.1
166.897	-61.4335	-194.5
166.898	-61.4337	-195.8
166.898	-61.4339	-192.2
166.899	-61.4341	-194.2
166.899	-61.4343	-195
166.899	-61.4345	-196.9
166.9	-61.4347	-196.9
166.9	-61.4349	-197.8
166.901	-61.4351	-197.7
166.901	-61.4353	-202.4
166.902	-61.4355	-202.3
166.902	-61.4357	-204
166.902	-61.4358	-203.1
166.903	-61.436	-205.3
166.903	-61.4362	-204.8
166.904	-61.4364	-202.4
166.904	-61.4366	-203.6
166.904	-61.4368	-204
166.905	-61.437	-206
166.905	-61.4372	-204.8
166.906	-61.4374	-211.9
166.906	-61.4376	-206.6
166.907	-61.4378	-213.2
166.907	-61.438	-213.9
166.907	-61.4382	-215.3
166.908	-61.4384	-213.4
166.908	-61.4386	-214.8
166.909	-61.4387	-215.8
166.909	-61.4389	-222.2
166.909	-61.4391	-222.6
166.91	-61.4393	-224.9
166.91	-61.4395	-224.9
166.911	-61.4397	-221.8
166.911	-61.4399	-221.6
166.912	-61.4401	-222.3
166.912	-61.4403	-222.9
166.912	-61.4405	-222.9
166.913	-61.4407	-223.9
166.913	-61.4409	-222.6
166.914	-61.4411	-223.6
166.914	-61.4413	-222.4
166.915	-61.4415	-224.3
166.915	-61.4417	-222.3
166.915	-61.4418	-223.4
166.916	-61.442	-222.9
166.916	-61.4422	-223.3
166.917	-61.4424	-224
166.917	-61.4426	-223.5
166.917	-61.4428	-225
166.918	-61.443	-224.6
166.918	-61.4432	-225.8
166.919	-61.4434	-226.2
166.919	-61.4436	-231.2
166.92	-61.4438	-226.8
166.92	-61.444	-232.9
166.92	-61.4442	-232.2
166.921	-61.4444	-233.2
166.921	-61.4446	-233.3
166.922	-61.4448	-233.9
166.922	-61.4449	-234.3
166.923	-61.4451	-234.8
166.923	-61.4453	-231.8
166.923	-61.4455	-231.8
166.924	-61.4457	-232.7
166.924	-61.4459	-232
166.925	-61.4461	-232.8
166.925	-61.4463	-233.3
166.925	-61.4465	-233.2
166.926	-61.4467	-234.4
166.926	-61.4469	-234.4
166.927	-61.4471	-234.7
166.927	-61.4473	-235.6
166.928	-61.4475	-235.5
166.928	-61.4477	-240.9
166.928	-61.4479	-240.8
166.929	-61.448	-242.5
166.929	-61.4482	-242.5
166.93	-61.4484	-244.7
166.93	-61.4486	-243.8
166.931	-61.4488	-242.5
166.931	-61.449	-241.9
166.931	-61.4492	-243.5
166.932	-61.4494	-244.4
166.932	-61.4496	-244.4
166.933	-61.4498	-245.3
166.933	-61.45	-245.7
166.933	-61.4502	-245.8
166.934	-61.4504	-250.7
166.934	-61.4506	-246.1
166.935	-61.4508	-250.7
166.935	-61.451	-250.7
166.936	-61.4511	-251.1
166.936	-61.4513	-250.9
166.936	-61.4515	-251.5
166.937	-61.4517	-251.9
166.937	-61.4519	-252
166.938	-61.4521	-252.1
166.938	-61.4523	-251
166.939	-61.4525	-251.7
166.939	-61.4527	-250.8
166.939	-61.4529	-251
166.94	-61.4531	-250.6
166.94	-61.4533	-250.8
166.941	-61.4535	-250.9
166.941	-61.4537	-250.4
166.941	-61.4539	-251
166.942	-61.4541	-250.5
166.942	-61.4542	-250.2
166.943	-61.4544	-250.9
166.943	-61.4546	-250.4
166.944	-61.4548	-251.4
166.944	-61.455	-250.1
166.944	-61.4552	-251.3
166.945	-61.4554	-250.3
166.945	-61.4556	-251
166.946	-61.4558	-250.6
166.946	-61.456	-250.8
166.946	-61.4562	-250.9
166.947	-61.4564	-250.3
166.947	-61.4566	-250.9
166.948	-61.4568	-245.7
166.948	-61.457	-250.5
166.949	-61.4572	-245.8
166.949	-61.4573	-245.2
166.949	-61.4575	-250
166.95	-61.4577	-244.9
166.95	-61.4579	-250.2
166.951	-61.4581	-244.5
166.951	-61.4583	-250.2
166.952	-61.4585	-244.4
166.952	-61.4587	-250.2
166.952	-61.4589	-245.2
166.953	-61.4591	-249.7
166.953	-61.4593	-245.5
166.954	-61.4595	-245.6
166.954	-61.4597	-250.5
166.954	-61.4599	-249.8
166.955	-61.4601	-250.7
166.955	-61.4603	-249.9
166.956	-61.4604	-250.3
166.956	-61.4606	-250.8
166.957	-61.4608	-250.6
166.957	-61.461	-250.6
166.957	-61.4612	-251.5
166.958	-61.4614	-250
166.958	-61.4616	-251.9
166.959	-61.4618	-250.3
166.959	-61.462	-251.9
166.96	-61.4622	-250.4
166.96	-61.4624	-250.9
166.96	-61.4626	-251.2
166.961	-61.4628	-250.1
166.961	-61.463	-251.1
166.962	-61.4632	-250.2
166.962	-61.4634	-251
166.962	-61.4635	-250.5
166.963	-61.4637	-251.2
166.963	-61.4639	-250.9
166.964	-61.4641	-251.4
166.964	-61.4643	-251.5
166.965	-61.4645	-251.8
166.965	-61.4647	-252.4
166.965	-61.4649	-251.8
166.966	-61.4651	-252.9
166.966	-61.4653	-252.3
166.967	-61.4655	-252.6
166.967	-61.4657	-252.9
166.968	-61.4659	-252.8
166.968	-61.4661	-249.3
166.968	-61.4663	-249.3
166.969	-61.4665	-252.6
166.969	-61.4666	-250
166.97	-61.4668	-249
166.97	-61.467	-249.9
166.97	-61.4672	-249.2
166.971	-61.4674	-250
166.971	-61.4676	-249.5
166.972	-61.4678	-249.5
166.972	-61.468	-249.1
166.973	-61.4682	-249.4
166.973	-61.4684	-252.7
166.973	-61.4686	-252.1
166.974	-61.4688	-251.9
166.974	-61.469	-250.5
166.975	-61.4692	-250.2
166.975	-61.4694	-249.1
166.976	-61.4696	-248.9
166.976	-61.4697	-243.6
166.976	-61.4699	-243.4
166.977	-61.4701	-241.6
166.977	-61.4703	-241.7
166.978	-61.4705	-240.4
166.978	-61.4707	-239.7
166.978	-61.4709	-239.6
166.979	-61.4711	-241.5
166.979	-61.4713	-242
166.98	-61.4715	-240.7
166.98	-61.4717	-240.4
166.981	-61.4719	-240.8
166.981	-61.4721	-240.5
166.981	-61.4723	-241
166.982	-61.4725	-240.4
166.982	-61.4727	-240.1
166.983	-61.4728	-238.9
166.983	-61.473	-234.2
166.983	-61.4732	-233.2
166.984	-61.4734	-232.3
166.984	-61.4736	-231.5
166.985	-61.4738	-230.8
166.985	-61.474	-230.2
166.986	-61.4742	-228.6
166.986	-61.4744	-228.5
166.986	-61.4746	-231.3
166.987	-61.4748	-230.7
166.987	-61.475	-229.9
166.988	-61.4752	-229.1
166.988	-61.4754	-228.8
166.989	-61.4756	-223.8
166.989	-61.4757	-223.6
166.989	-61.4759	-222.7
166.99	-61.4761	-222.7
166.99	-61.4763	-221.8
166.991	-61.4765	-221.3
166.991	-61.4767	-220.6
166.991	-61.4769	-219.7
166.992	-61.4771	-219.6
166.992	-61.4773	-218.1
166.993	-61.4775	-221.7
166.993	-61.4777	-220.3
166.994	-61.4779	-220.4
166.994	-61.4781	-218.7
166.994	-61.4783	-218.8
166.995	-61.4785	-213.1
166.995	-61.4787	-213.4
166.996	-61.4788	-211.9
166.996	-61.479	-211.6
166.997	-61.4792	-211
166.997	-61.4794	-209.6
166.997	-61.4796	-209.5
166.998	-61.4798	-207.8
166.998	-61.48	-208
166.999	-61.4802	-209.8
166.999	-61.4804	-209.6
166.999	-61.4806	-207.7
167	-61.4808	-203.4
167	-61.481	-200.8
167.001	-61.4812	-201.2
167.001	-61.4814	-198.1
167.002	-61.4816	-198.5
167.002	-61.4818	-199.7
167.002	-61.4819	-199.9
167.003	-61.4821	-192.3
167.003	-61.4823	-193.1
167.004	-61.4825	-189.7
167.004	-61.4827	-189.4
167.005	-61.4829	-187.9
167.005	-61.4831	-190.3
167.005	-61.4833	-189.6
167.006	-61.4835	-183.2
167.006	-61.4837	-182.8
167.007	-61.4839	-181
167.007	-61.4841	-179.8
167.007	-61.4843	-178.7
167.008	-61.4845	-181.2
167.008	-61.4847	-180.3
167.009	-61.4849	-178.3
167.009	-61.485	-178
167.01	-61.4852	-171.6
167.01	-61.4854	-171.4
167.01	-61.4856	-169.6
167.011	-61.4858	-168.6
167.011	-61.486	-167.5
167.012	-61.4862	-169.7
167.012	-61.4864	-168.8
167.013	-61.4866	-167.3
167.013	-61.4868	-162.2
167.013	-61.487	-161.3
167.014	-61.4872	-160.1
167.014	-61.4874	-158.9
167.015	-61.4876	-157.6
167.015	-61.4878	-160.7
167.015	-61.488	-160
167.016	-61.4881	-158
167.016	-61.4883	-158.2
167.017	-61.4885	-151.7
167.017	-61.4887	-152.3
167.018	-61.4889	-149.4
167.018	-61.4891	-150.3
167.018	-61.4893	-147.4
167.019	-61.4895	-147.9
167.019	-61.4897	-150.1
167.02	-61.4899	-148.9
167.02	-61.4901	-148.7
167.02	-61.4903	-146.8
167.021	-61.4905	-142.5
167.021	-61.4907	-141.3
167.022	-61.4909	-141
167.022	-61.4911	-139.8
167.023	-61.4912	-139.1
167.023	-61.4914	-138.4
167.023	-61.4916	-137.8
167.024	-61.4918	-136.9
167.024	-61.492	-136.6
167.025	-61.4922	-140.1
167.025	-61.4924	-139.7
167.026	-61.4926	-139.4
167.026	-61.4928	-139.2
167.026	-61.493	-138.5
167.027	-61.4932	-138.7
167.027	-61.4934	-138.1
167.028	-61.4936	-138
167.028	-61.4938	-137.5
167.028	-61.494	-137.2
167.029	-61.4942	-132.2
167.029	-61.4943	-132.1
167.03	-61.4945	-131.2
167.03	-61.4947	-130.6
167.031	-61.4949	-130.1
167.031	-61.4951	-129.1
167.031	-61.4953	-128.7
167.032	-61.4955	-128.8
167.032	-61.4957	-127.6
167.033	-61.4959	-127.8
167.033	-61.4961	-126.6
167.034	-61.4963	-126.9
167.034	-61.4965	-126.2
167.034	-61.4967	-129.7
167.035	-61.4969	-129.7
167.035	-61.4971	-128
167.036	-61.4973	-129.3
167.036	-61.4974	-126.9
167.036	-61.4976	-128.6
167.037	-61.4978	-126
167.037	-61.498	-127.8
167.038	-61.4982	-121.3
167.038	-61.4984	-126
167.039	-61.4986	-121.5
167.039	-61.4988	-120.6
167.039	-61.499	-121.1
167.04	-61.4992	-120
167.04	-61.4994	-120.1
167.041	-61.4996	-119.6
167.041	-61.4998	-119.2
167.042	-61.5	-119.5
167.042	-61.5002	-118.6
167.042	-61.5004	-119.3
167.043	-61.5005	-117.7
167.043	-61.5007	-119
167.044	-61.5009	-117.1
167.044	-61.5011	-119
167.044	-61.5013	-117.1
167.045	-61.5015	-118.3
167.045	-61.5017	-117.6
167.046	-61.5019	-117.6
167.046	-61.5021	-117.8
167.047	-61.5023	-118.1
167.047	-61.5025	-117.8
167.047	-61.5027	-118.5
167.048	-61.5029	-117.3
167.048	-61.5031	-119.3
167.049	-61.5033	-117.6
167.049	-61.5035	-119.2
167.05	-61.5036	-118.6
167.05	-61.5038	-119.2
167.05	-61.504	-119.3
167.051	-61.5042	-119.4
167.051	-61.5044	-119.9
167.052	-61.5046	-120.2
167.052	-61.5048	-120.3
167.052	-61.505	-121.1
167.053	-61.5052	-120.5
167.053	-61.5054	-126.3
167.054	-61.5056	-125.5
167.054	-61.5058	-126.9
167.055	-61.506	-126.9
167.055	-61.5062	-127.7
167.055	-61.5064	-128.4
167.056	-61.5066	-128.8
167.056	-61.5067	-125.9
167.057	-61.5069	-125.9
167.057	-61.5071	-127.1
167.057	-61.5073	-127
167.058	-61.5075	-127.5
167.058	-61.5077	-127.6
167.059	-61.5079	-127.4
167.059	-61.5081	-127.6
167.06	-61.5083	-127.4
167.06	-61.5085	-127.1
167.06	-61.5087	-127.7
167.061	-61.5089	-126.8
167.061	-61.5091	-127.6
167.062	-61.5093	-126.4
167.062	-61.5095	-126.8
167.063	-61.5097	-126
167.063	-61.5098	-126.4
167.063	-61.51	-125.7
167.064	-61.5102	-126.1
167.064	-61.5104	-125.4
167.065	-61.5106	-125.4
167.065	-61.5108	-126.3
167.065	-61.511	-125
167.066	-61.5112	-126.1
167.066	-61.5114	-125.2
167.067	-61.5116	-125.5
167.067	-61.5118	-125.6
167.068	-61.512	-125.4
167.068	-61.5122	-125.6
167.068	-61.5124	-124.8
167.069	-61.5126	-125.1
167.069	-61.5127	-124.7
167.07	-61.5129	-128.2
167.07	-61.5131	-125
167.071	-61.5133	-128
167.071	-61.5135	-124.6
167.071	-61.5137	-127.5
167.072	-61.5139	-128.3
167.072	-61.5141	-126.9
167.073	-61.5143	-127.2
167.073	-61.5145	-127.3
167.073	-61.5147	-126.1
167.074	-61.5149	-127.5
167.074	-61.5151	-125.9
167.075	-61.5153	-127.5
167.075	-61.5155	-126.1
167.076	-61.5157	-127.5
167.076	-61.5159	-127.4
167.076	-61.516	-127.7
167.077	-61.5162	-127.7
167.077	-61.5164	-124.8
167.078	-61.5166	-124.2
167.078	-61.5168	-125.6
167.079	-61.517	-124.6
167.079	-61.5172	-125.7
167.079	-61.5174	-126
167.08	-61.5176	-126.1
167.08	-61.5178	-126.3
167.081	-61.518	-125.8
167.081	-61.5182	-127.2
167.081	-61.5184	-125.4
167.082	-61.5186	-126.9
167.082	-61.5188	-125.2
167.083	-61.5189	-126.5
167.083	-61.5191	-125.6
167.084	-61.5193	-126.7
167.084	-61.5195	-126.2
167.084	-61.5197	-127
167.085	-61.5199	-127.5
167.085	-61.5201	-126.9
167.086	-61.5203	-127.7
167.086	-61.5205	-127.5
167.087	-61.5207	-127.6
167.087	-61.5209	-128.3
167.087	-61.5211	-128
167.088	-61.5213	-128.2
167.088	-61.5215	-133.9
167.089	-61.5217	-128.1
167.089	-61.5219	-134.3
167.089	-61.522	-128.4
167.09	-61.5222	-134.2
167.09	-61.5224	-133.8
167.091	-61.5226	-134.4
167.091	-61.5228	-134.5
167.092	-61.523	-134.9
167.092	-61.5232	-134.6
167.092	-61.5234	-135
167.093	-61.5236	-135.2
167.093	-61.5238	-135
167.094	-61.524	-135.6
167.094	-61.5242	-135.5
167.094	-61.5244	-135.7
167.095	-61.5246	-136
167.095	-61.5248	-136
167.096	-61.525	-136.7
167.096	-61.5251	-136.6
167.097	-61.5253	-137
167.097	-61.5255	-136.6
167.097	-61.5257	-137.2
167.098	-61.5259	-136.8
167.098	-61.5261	-136.5
167.099	-61.5263	-136.3
167.099	-61.5265	-136.6
167.1	-61.5267	-136
167.1	-61.5269	-136.9
167.1	-61.5271	-135.9
167.101	-61.5273	-136.7
167.101	-61.5275	-136.3
167.102	-61.5277	-136
167.102	-61.5279	-133.3
167.102	-61.5281	-135.7
167.103	-61.5282	-136.8
167.103	-61.5284	-136.2
167.104	-61.5286	-136.3
167.104	-61.5288	-136.2
167.105	-61.529	-135.5
167.105	-61.5292	-135.1
167.105	-61.5294	-135.5
167.106	-61.5296	-134.5
167.106	-61.5298	-135
167.107	-61.53	-134.2
167.107	-61.5302	-134.1
167.108	-61.5304	-134.4
167.108	-61.5306	-133
167.108	-61.5308	-133.8
167.109	-61.531	-133
167.109	-61.5312	-128.4
167.11	-61.5313	-133.1
167.11	-61.5315	-127.1
167.11	-61.5317	-133.1
167.111	-61.5319	-125.9
167.111	-61.5321	-132.7
167.112	-61.5323	-125.8
167.112	-61.5325	-126.7
167.113	-61.5327	-125.6
167.113	-61.5329	-126
167.113	-61.5331	-125.1
167.114	-61.5333	-124.6
167.114	-61.5335	-124.9
167.115	-61.5337	-123.7
167.115	-61.5339	-123.7
167.116	-61.5341	-123.2
167.116	-61.5343	-123.5
167.116	-61.5344	-126.1
167.117	-61.5346	-123.1
167.117	-61.5348	-125.2
167.118	-61.535	-125.9
167.118	-61.5352	-124.9
167.118	-61.5354	-124.3
167.119	-61.5356	-124.5
167.119	-61.5358	-123.3
167.12	-61.536	-123.8
167.12	-61.5362	-118
167.121	-61.5364	-123
167.121	-61.5366	-116.5
167.121	-61.5368	-117.9
167.122	-61.537	-116.4
167.122	-61.5372	-116.2
167.123	-61.5374	-116.1
167.123	-61.5375	-115
167.124	-61.5377	-114.9
167.124	-61.5379	-114.6
167.124	-61.5381	-114
167.125	-61.5383	-113.7
167.125	-61.5385	-113.3
167.126	-61.5387	-112
167.126	-61.5389	-112.9
167.126	-61.5391	-114.5
167.127	-61.5393	-115.9
167.127	-61.5395	-113.6
167.128	-61.5397	-114.8
167.128	-61.5399	-112.4
167.129	-61.5401	-113.8
167.129	-61.5403	-107.4
167.129	-61.5405	-112
167.13	-61.5406	-106
167.13	-61.5408	-106.4
167.131	-61.541	-105
167.131	-61.5412	-104.3
167.131	-61.5414	-103.2
167.132	-61.5416	-102.5
167.132	-61.5418	-105.6
167.133	-61.542	-104.9
167.133	-61.5422	-103.8
167.134	-61.5424	-103.3
167.134	-61.5426	-102.1
167.134	-61.5428	-97.4
167.135	-61.543	-96.1
167.135	-61.5432	-95.8
167.136	-61.5434	-94.6
167.136	-61.5436	-93.5
167.137	-61.5437	-93.3
167.137	-61.5439	-91.7
167.137	-61.5441	-95.3
167.138	-61.5443	-93.7
167.138	-61.5445	-93.3
167.139	-61.5447	-92
167.139	-61.5449	-91.5
167.139	-61.5451	-87
167.14	-61.5453	-86
167.14	-61.5455	-85.4
167.141	-61.5457	-84.8
167.141	-61.5459	-83.7
167.142	-61.5461	-84.4
167.142	-61.5463	-82.4
167.142	-61.5465	-83.4
167.143	-61.5467	-85.1
167.143	-61.5468	-82.7
167.144	-61.547	-83.6
167.144	-61.5472	-85.1
167.145	-61.5474	-83.3
167.145	-61.5476	-83
167.145	-61.5478	-82
167.146	-61.548	-77.1
167.146	-61.5482	-76.3
167.147	-61.5484	-75.3
167.147	-61.5486	-74.5
167.147	-61.5488	-73.6
167.148	-61.549	-73.3
167.148	-61.5492	-72
167.149	-61.5494	-72.4
167.149	-61.5496	-74.5
167.15	-61.5498	-74.9
167.15	-61.5499	-73.5
167.15	-61.5501	-72.8
167.151	-61.5503	-73.1
167.151	-61.5505	-70.9
167.152	-61.5507	-71.9
167.152	-61.5509	-65.3
167.153	-61.5511	-66.5
167.153	-61.5513	-64.6
167.153	-61.5515	-64.7
167.154	-61.5517	-63.8
167.154	-61.5519	-62.9
167.155	-61.5521	-62.8
167.155	-61.5523	-61.3
167.155	-61.5525	-61.6
167.156	-61.5527	-64.3
167.156	-61.5528	-63.9
167.157	-61.553	-63.1
167.157	-61.5532	-62.8
167.158	-61.5534	-62
167.158	-61.5536	-61.7
167.158	-61.5538	-60.6
167.159	-61.554	-61.3
167.159	-61.5542	-55.2
167.16	-61.5544	-56.3
167.16	-61.5546	-54
167.161	-61.5548	-55.2
167.161	-61.555	-52.9
167.161	-61.5552	-53.5
167.162	-61.5554	-52.2
167.162	-61.5556	-52
167.163	-61.5558	-52
167.163	-61.5559	-50.6
167.163	-61.5561	-51.3
167.164	-61.5563	-53.5
167.164	-61.5565	-50.5
167.165	-61.5567	-53
167.165	-61.5569	-53
167.166	-61.5571	-52.4
167.166	-61.5573	-52.4
167.166	-61.5575	-52.1
167.167	-61.5577	-52.2
167.167	-61.5579	-51
167.168	-61.5581	-51.8
167.168	-61.5583	-50.3
167.168	-61.5585	-50.7
167.169	-61.5587	-45.8
167.169	-61.5589	-50
167.17	-61.559	-45.5
167.17	-61.5592	-45.1
167.171	-61.5594	-45.2
167.171	-61.5596	-44.7
167.171	-61.5598	-43.9
167.172	-61.56	-44.3
167.172	-61.5602	-43.5
167.173	-61.5604	-42.8
167.173	-61.5606	-43.2
167.174	-61.5608	-41.8
167.174	-61.561	-42.3
167.174	-61.5612	-41
167.175	-61.5614	-41.5
167.175	-61.5616	-43.6
167.176	-61.5618	-40.8
167.176	-61.562	-42.9
167.176	-61.5621	-43.5
167.177	-61.5623	-41.8
167.177	-61.5625	-42.9
167.178	-61.5627	-40.8
167.178	-61.5629	-41.4
167.179	-61.5631	-40.4
167.179	-61.5633	-40.3
167.179	-61.5635	-39.7
167.18	-61.5637	-35.1
167.18	-61.5639	-35
167.181	-61.5641	-33.7
167.181	-61.5643	-34.1
167.182	-61.5645	-32.1
167.182	-61.5647	-33.5
167.182	-61.5649	-31.5
167.183	-61.5651	-32
167.183	-61.5652	-30.7
167.184	-61.5654	-30.8
167.184	-61.5656	-30.1
167.184	-61.5658	-32.7
167.185	-61.566	-30.2
167.185	-61.5662	-30.9
167.186	-61.5664	-29.5
167.186	-61.5666	-30
167.187	-61.5668	-32.2
167.187	-61.567	-25.1
167.187	-61.5672	-31.1
167.188	-61.5674	-24.7
167.188	-61.5676	-29.9
167.189	-61.5678	-24.6
167.189	-61.568	-24.5
167.19	-61.5682	-24.2
167.19	-61.5683	-23.2
167.19	-61.5685	-23.9
167.191	-61.5687	-22.1
167.191	-61.5689	-23.2
167.192	-61.5691	-21.2
167.192	-61.5693	-22.6
167.192	-61.5695	-20.5
167.193	-61.5697	-21.9
167.193	-61.5699	-20
167.194	-61.5701	-21.7
167.194	-61.5703	-19.2
167.195	-61.5705	-20.4
167.195	-61.5707	-18.9
167.195	-61.5709	-20
167.196	-61.5711	-22.8
167.196	-61.5713	-22.6
167.197	-61.5714	-19.2
167.197	-61.5716	-21.4
167.198	-61.5718	-18.9
167.198	-61.572	-20.9
167.198	-61.5722	-22.2
167.199	-61.5724	-20.3
167.199	-61.5726	-21.5
167.2	-61.5728	-19.3
167.2	-61.573	-20.2
167.2	-61.5732	-14.3
167.201	-61.5734	-19.3
167.201	-61.5736	-13.6
167.202	-61.5738	-13.8
167.202	-61.574	-12.8
167.203	-61.5742	-12.8
167.203	-61.5744	-11.9
167.203	-61.5745	-11.6
167.204	-61.5747	-10.8
167.204	-61.5749	-10.7
167.205	-61.5751	-9.9
167.205	-61.5753	-9.1
167.205	-61.5755	-9.3
167.206	-61.5757	-12.1
167.206	-61.5759	-12.3
167.207	-61.5761	-10.9
167.207	-61.5763	-11.4
167.208	-61.5765	-10.4
167.208	-61.5767	-10.1
167.208	-61.5769	-10.3
167.209	-61.5771	-8.3
167.209	-61.5773	-9.5
167.21	-61.5775	-3.3
167.21	-61.5776	-8.8
167.211	-61.5778	-2.8
167.211	-61.578	-3.1
167.211	-61.5782	-2.6
167.212	-61.5784	-1.5
167.212	-61.5786	-2.4
167.213	-61.5788	-0.5
167.213	-61.579	-1.2
167.213	-61.5792	-0.3
167.214	-61.5794	0
167.214	-61.5796	0.3
167.215	-61.5798	1.2
167.215	-61.58	0.9
167.216	-61.5802	2
167.216	-61.5804	1.2
167.216	-61.5806	-1.4
167.217	-61.5807	2
167.217	-61.5809	-1.2
167.218	-61.5811	-0.5
167.218	-61.5813	-1.1
167.219	-61.5815	0.2
167.219	-61.5817	-0.4
167.219	-61.5819	0.7
167.22	-61.5821	0.2
167.22	-61.5823	0.7
167.221	-61.5825	1.8
167.221	-61.5827	0.6
167.221	-61.5829	6.5
167.222	-61.5831	0.7
167.222	-61.5833	7.2
167.223	-61.5835	0.8
167.223	-61.5837	7.4
167.224	-61.5838	2
167.224	-61.584	7
167.224	-61.5842	7.6
167.225	-61.5844	6.5
167.225	-61.5846	8.6
167.226	-61.5848	6.7
167.226	-61.585	8.9
167.227	-61.5852	7.7
167.227	-61.5854	9.4
167.227	-61.5856	8.5
167.228	-61.5858	8.6
167.228	-61.586	10.1
167.229	-61.5862	8.9
167.229	-61.5864	10.2
167.229	-61.5866	9.5
167.23	-61.5868	10.3
167.23	-61.5869	9.9
167.231	-61.5871	10.9
167.231	-61.5873	10.4
167.232	-61.5875	11
167.232	-61.5877	11
167.232	-61.5879	11.2
167.233	-61.5881	11.7
167.233	-61.5883	11.9
167.234	-61.5885	11.7
167.234	-61.5887	12.9
167.235	-61.5889	11.4
167.235	-61.5891	9.5
167.235	-61.5893	12.1
167.236	-61.5895	9.6
167.236	-61.5897	9.1
167.237	-61.5898	9.5
167.237	-61.59	9.5
167.237	-61.5902	10.2
167.238	-61.5904	10
167.238	-61.5906	11
167.239	-61.5908	10.1
167.239	-61.591	11.6
167.24	-61.5912	10.3
167.24	-61.5914	12.6
167.24	-61.5916	10.8
167.241	-61.5918	12.8
167.241	-61.592	12
167.242	-61.5922	12.1
167.242	-61.5924	13.1
167.242	-61.5926	12.5
167.243	-61.5928	13.1
167.243	-61.593	13
167.244	-61.5931	13.3
167.244	-61.5933	17.6
167.245	-61.5935	17.6
167.245	-61.5937	17.9
167.245	-61.5939	17.9
167.246	-61.5941	18.1
167.246	-61.5943	18
167.247	-61.5945	18.8
167.247	-61.5947	17.9
167.248	-61.5949	19.4
167.248	-61.5951	18.2
167.248	-61.5953	20
167.249	-61.5955	18.6
167.249	-61.5957	19.6
167.25	-61.5959	19.4
167.25	-61.596	19.2
167.25	-61.5962	20.4
167.251	-61.5964	19.5
167.251	-61.5966	20.6
167.252	-61.5968	19.8
167.252	-61.597	21.2
167.253	-61.5972	20.2
167.253	-61.5974	21.2
167.253	-61.5976	20.6
167.254	-61.5978	22
167.254	-61.598	20.8
167.255	-61.5982	22.2
167.255	-61.5984	21.1
167.256	-61.5986	23.1
167.256	-61.5988	21.6
167.256	-61.599	23.2
167.257	-61.5991	22
167.257	-61.5993	23.4
167.258	-61.5995	23.2
167.258	-61.5997	23.7
167.258	-61.5999	23.8
167.259	-61.6001	23
167.259	-61.6003	21.2
167.26	-61.6005	22.9
167.26	-61.6007	21.6
167.261	-61.6009	23.8
167.261	-61.6011	21.4
167.261	-61.6013	20.9
167.262	-61.6015	21.3
167.262	-61.6017	21.9
167.263	-61.6019	21.3
167.263	-61.6021	22.3
167.264	-61.6022	22.5
167.264	-61.6024	22.5
167.264	-61.6026	23
167.265	-61.6028	23.3
167.265	-61.603	23.7
167.266	-61.6032	24
167.266	-61.6034	24.2
167.266	-61.6036	28.5
167.267	-61.6038	28.5
167.267	-61.604	29.3
167.268	-61.6042	29.1
167.268	-61.6044	30
167.269	-61.6046	30.4
167.269	-61.6048	30
167.269	-61.605	31.3
167.27	-61.6052	30.9
167.27	-61.6053	31.5
167.271	-61.6055	31.7
167.271	-61.6057	32.3
167.272	-61.6059	32
167.272	-61.6061	33.5
167.272	-61.6063	32.6
167.273	-61.6065	34.5
167.273	-61.6067	33
167.274	-61.6069	31.4
167.274	-61.6071	33.9
167.274	-61.6073	31.2
167.275	-61.6075	31.4
167.275	-61.6077	31.6
167.276	-61.6079	32.2
167.276	-61.6081	32.5
167.277	-61.6083	33
167.277	-61.6084	33.5
167.277	-61.6086	33.7
167.278	-61.6088	34.6
167.278	-61.609	34.2
167.279	-61.6092	39.8
167.279	-61.6094	39.2
167.279	-61.6096	40.6
167.28	-61.6098	40.4
167.28	-61.61	40.7
167.281	-61.6102	40.9
167.281	-61.6104	41.9
167.282	-61.6106	42
167.282	-61.6108	42.3
167.282	-61.611	43.2
167.283	-61.6112	43.4
167.283	-61.6114	43.5
167.284	-61.6115	45
167.284	-61.6117	44.1
167.285	-61.6119	41.8
167.285	-61.6121	44.9
167.285	-61.6123	42.6
167.286	-61.6125	41.8
167.286	-61.6127	43.8
167.287	-61.6129	42.7
167.287	-61.6131	44
167.287	-61.6133	43.5
167.288	-61.6135	44.7
167.288	-61.6137	44.2
167.289	-61.6139	45.2
167.289	-61.6141	44.9
167.29	-61.6143	49.7
167.29	-61.6145	49.8
167.29	-61.6146	49.7
167.291	-61.6148	50.6
167.291	-61.615	50.5
167.292	-61.6152	50.5
167.292	-61.6154	51.2
167.293	-61.6156	51.2
167.293	-61.6158	50.6
167.293	-61.616	52.1
167.294	-61.6162	51.4
167.294	-61.6164	51.7
167.295	-61.6166	51.6
167.295	-61.6168	52
167.295	-61.617	52.2
167.296	-61.6172	52.1
167.296	-61.6174	52.5
167.297	-61.6176	52.6
167.297	-61.6177	52.1
167.298	-61.6179	52.8
167.298	-61.6181	52.1
167.298	-61.6183	53.5
167.299	-61.6185	52
167.299	-61.6187	53.3
167.3	-61.6189	52.4
167.3	-61.6191	53.1
167.301	-61.6193	52.7
167.301	-61.6195	53
167.301	-61.6197	52.8
167.302	-61.6199	52.8
167.302	-61.6201	52.7
167.303	-61.6203	52.9
167.303	-61.6205	52.1
167.303	-61.6207	53.6
167.304	-61.6208	51.4
167.304	-61.621	53.4
167.305	-61.6212	51.4
167.305	-61.6214	53
167.306	-61.6216	51
167.306	-61.6218	52.4
167.306	-61.622	51
167.307	-61.6222	52.2
167.307	-61.6224	51
167.308	-61.6226	51.9
167.308	-61.6228	50.7
167.309	-61.623	51.3
167.309	-61.6232	50.5
167.309	-61.6234	50.9
167.31	-61.6236	46.3
167.31	-61.6238	46.3
167.311	-61.6239	50.4
167.311	-61.6241	44.9
167.311	-61.6243	50.4
167.312	-61.6245	44.6
167.312	-61.6247	45.8
167.313	-61.6249	44.3
167.313	-61.6251	44.6
167.314	-61.6253	43.8
167.314	-61.6255	44
167.314	-61.6257	43.1
167.315	-61.6259	43.3
167.315	-61.6261	46
167.316	-61.6263	46
167.316	-61.6265	45.7
167.316	-61.6267	44.9
167.317	-61.6268	44.5
167.317	-61.627	44.2
167.318	-61.6272	43.2
167.318	-61.6274	43
167.319	-61.6276	42.3
167.319	-61.6278	41.8
167.319	-61.628	41.5
167.32	-61.6282	36.4
167.32	-61.6284	36.6
167.321	-61.6286	35
167.321	-61.6288	35.4
167.322	-61.629	33.6
167.322	-61.6292	33.6
167.322	-61.6294	33
167.323	-61.6296	35.8
167.323	-61.6298	35.4
167.324	-61.63	34.4
167.324	-61.6301	33.6
167.324	-61.6303	33.3
167.325	-61.6305	32
167.325	-61.6307	31.6
167.326	-61.6309	26.4
167.326	-61.6311	25.9
167.327	-61.6313	25.1
167.327	-61.6315	24.3
167.327	-61.6317	23.6
167.328	-61.6319	26.6
167.328	-61.6321	25.7
167.329	-61.6323	24.6
167.329	-61.6325	24.2
167.33	-61.6327	23.1
167.33	-61.6329	22.3
167.33	-61.633	21.8
167.331	-61.6332	16.5
167.331	-61.6334	16.3
167.332	-61.6336	14.8
167.332	-61.6338	14.7
167.332	-61.634	16.8
167.333	-61.6342	13.5
167.333	-61.6344	15.6
167.334	-61.6346	15
167.334	-61.6348	14.4
167.335	-61.635	14
167.335	-61.6352	12.2
167.335	-61.6354	13
167.336	-61.6356	6.8
167.336	-61.6358	11.7
167.337	-61.636	5.2
167.337	-61.6361	5.9
167.338	-61.6363	4.1
167.338	-61.6365	4.1
167.338	-61.6367	6.7
167.339	-61.6369	6.6
167.339	-61.6371	4.9
167.34	-61.6373	6.1
167.34	-61.6375	3.2
167.34	-61.6377	4.3
167.341	-61.6379	2.3
167.341	-61.6381	2.4
167.342	-61.6383	-2.7
167.342	-61.6385	-3.4
167.343	-61.6387	-4.1
167.343	-61.6389	-4.6
167.343	-61.6391	-5.4
167.344	-61.6392	-2.6
167.344	-61.6394	-2.9
167.345	-61.6396	-3.6
167.345	-61.6398	-4.1
167.346	-61.64	-5.8
167.346	-61.6402	-5
167.346	-61.6404	-7.5
167.347	-61.6406	-6.6
167.347	-61.6408	-12.7
167.348	-61.641	-12.1
167.348	-61.6412	-13.7
167.348	-61.6414	-14.1
167.349	-61.6416	-14.5
167.349	-61.6418	-12
167.35	-61.642	-15.1
167.35	-61.6422	-13.8
167.351	-61.6423	-12.7
167.351	-61.6425	-14.3
167.351	-61.6427	-14.6
167.352	-61.6429	-14.9
167.352	-61.6431	-16.4
167.353	-61.6433	-16
167.353	-61.6435	-17.5
167.353	-61.6437	-17.1
167.354	-61.6439	-21.9
167.354	-61.6441	-22.6
167.355	-61.6443	-22.6
167.355	-61.6445	-23.5
167.356	-61.6447	-23.8
167.356	-61.6449	-23.9
167.356	-61.6451	-25.4
167.357	-61.6453	-24.3
167.357	-61.6454	-22.6
167.358	-61.6456	-25.1
167.358	-61.6458	-23.2
167.359	-61.646	-22.6
167.359	-61.6462	-24.1
167.359	-61.6464	-23.2
167.36	-61.6466	-25.1
167.36	-61.6468	-24.2
167.361	-61.647	-26
167.361	-61.6472	-24
167.361	-61.6474	-31.4
167.362	-61.6476	-25
167.362	-61.6478	-31.5
167.363	-61.648	-26.3
167.363	-61.6482	-31.6
167.364	-61.6484	-31.8
167.364	-61.6485	-31.9
167.364	-61.6487	-32.6
167.365	-61.6489	-32.5
167.365	-61.6491	-33.7
167.366	-61.6493	-32.6
167.366	-61.6495	-34.5
167.367	-61.6497	-33.6
167.367	-61.6499	-34.5
167.367	-61.6501	-34.5
167.368	-61.6503	-35
167.368	-61.6505	-35
167.369	-61.6507	-31.7
167.369	-61.6509	-31.6
167.369	-61.6511	-32.4
167.37	-61.6513	-32.2
167.37	-61.6515	-33
167.371	-61.6516	-32.7
167.371	-61.6518	-33.6
167.372	-61.652	-33.1
167.372	-61.6522	-34.1
167.372	-61.6524	-33.4
167.373	-61.6526	-34.5
167.373	-61.6528	-34
167.374	-61.653	-34.6
167.374	-61.6532	-34.5
167.375	-61.6534	-35.1
167.375	-61.6536	-35.8
167.375	-61.6538	-34.8
167.376	-61.654	-40.7
167.376	-61.6542	-35.3
167.377	-61.6544	-41
167.377	-61.6546	-36.4
167.377	-61.6547	-41.1
167.378	-61.6549	-41.5
167.378	-61.6551	-42
167.379	-61.6553	-42.4
167.379	-61.6555	-42.7
167.38	-61.6557	-42.6
167.38	-61.6559	-43.9
167.38	-61.6561	-43.6
167.381	-61.6563	-44.3
167.381	-61.6565	-44.3
167.382	-61.6567	-40.9
167.382	-61.6569	-41.2
167.383	-61.6571	-41.4
167.383	-61.6573	-41.7
167.383	-61.6575	-42.4
167.384	-61.6577	-42.6
167.384	-61.6578	-42.9
167.385	-61.658	-43.4
167.385	-61.6582	-42.7
167.385	-61.6584	-44.6
167.386	-61.6586	-43
167.386	-61.6588	-44.8
167.387	-61.659	-44.1
167.387	-61.6592	-44.5
167.388	-61.6594	-45.3
167.388	-61.6596	-44.3
167.388	-61.6598	-45.6
167.389	-61.66	-44.8
167.389	-61.6602	-45.6
167.39	-61.6604	-45.1
167.39	-61.6606	-46
167.391	-61.6608	-45.6
167.391	-61.6609	-50.8
167.391	-61.6611	-50.3
167.392	-61.6613	-51.1
167.392	-61.6615	-51.1
167.393	-61.6617	-52.2
167.393	-61.6619	-51.9
167.393	-61.6621	-53.1
167.394	-61.6623	-52.6
167.394	-61.6625	-53.8
167.395	-61.6627	-53.5
167.395	-61.6629	-50.7
167.396	-61.6631	-53.6
167.396	-61.6633	-51.4
167.396	-61.6635	-50.7
167.397	-61.6637	-52
167.397	-61.6639	-51
167.398	-61.664	-52.5
167.398	-61.6642	-51.9
167.398	-61.6644	-52.4
167.399	-61.6646	-52.1
167.399	-61.6648	-52.9
167.4	-61.665	-52.4
167.4	-61.6652	-52.9
167.401	-61.6654	-52.7
167.401	-61.6656	-53.3
167.401	-61.6658	-53.4
167.402	-61.666	-53.2
167.402	-61.6662	-53.9
167.403	-61.6664	-53.1
167.403	-61.6666	-54.5
167.404	-61.6668	-53.3
167.404	-61.6669	-54.7
167.404	-61.6671	-53.9
167.405	-61.6673	-54.5
167.405	-61.6675	-54.6
167.406	-61.6677	-54.8
167.406	-61.6679	-54.9
167.406	-61.6681	-55
167.407	-61.6683	-59.9
167.407	-61.6685	-59.3
167.408	-61.6687	-60.1
167.408	-61.6689	-59.4
167.409	-61.6691	-60.2
167.409	-61.6693	-59.8
167.409	-61.6695	-59.8
167.41	-61.6697	-59.6
167.41	-61.6699	-59.4
167.411	-61.6701	-55.1
167.411	-61.6702	-54.9
167.412	-61.6704	-55
167.412	-61.6706	-54.5
167.412	-61.6708	-54.1
167.413	-61.671	-53.8
167.413	-61.6712	-53.7
167.414	-61.6714	-53.1
167.414	-61.6716	-52.9
167.414	-61.6718	-52
167.415	-61.672	-52.4
167.415	-61.6722	-51
167.416	-61.6724	-51
167.416	-61.6726	-50.4
167.417	-61.6728	-49.9
167.417	-61.673	-49.3
167.417	-61.6731	-49.2
167.418	-61.6733	-52.6
167.418	-61.6735	-52.2
167.419	-61.6737	-52.3
167.419	-61.6739	-51
167.42	-61.6741	-51.9
167.42	-61.6743	-50.6
167.42	-61.6745	-51.1
167.421	-61.6747	-50.6
167.421	-61.6749	-50.1
167.422	-61.6751	-50.6
167.422	-61.6753	-49.2
167.422	-61.6755	-50.4
167.423	-61.6757	-44.4
167.423	-61.6759	-49.9
167.424	-61.6761	-44.1
167.424	-61.6762	-48.6
167.425	-61.6764	-44
167.425	-61.6766	-44.1
167.425	-61.6768	-43.4
167.426	-61.677	-42.8
167.426	-61.6772	-43.4
167.427	-61.6774	-42.8
167.427	-61.6776	-42.5
167.428	-61.6778	-42.2
167.428	-61.678	-41.5
167.428	-61.6782	-41.1
167.429	-61.6784	-41.2
167.429	-61.6786	-40.7
167.43	-61.6788	-40
167.43	-61.679	-40.2
167.43	-61.6792	-39.3
167.431	-61.6793	-39.4
167.431	-61.6795	-38.5
167.432	-61.6797	-38.5
167.432	-61.6799	-38.2
167.433	-61.6801	-38.2
167.433	-61.6803	-41.5
167.433	-61.6805	-41.1
167.434	-61.6807	-41.2
167.434	-61.6809	-40.7
167.435	-61.6811	-40.7
167.435	-61.6813	-39.9
167.435	-61.6815	-40.1
167.436	-61.6817	-39.6
167.436	-61.6819	-39.6
167.437	-61.6821	-39
167.437	-61.6823	-39.5
167.438	-61.6824	-38.6
167.438	-61.6826	-38.5
167.438	-61.6828	-38.1
167.439	-61.683	-38.2
167.439	-61.6832	-38.2
167.44	-61.6834	-33.6
167.44	-61.6836	-37.7
167.441	-61.6838	-32.8
167.441	-61.684	-33
167.441	-61.6842	-32.4
167.442	-61.6844	-32.2
167.442	-61.6846	-31.7
167.443	-61.6848	-31.7
167.443	-61.685	-31.1
167.443	-61.6852	-31.1
167.444	-61.6854	-30.4
167.444	-61.6855	-30.1
167.445	-61.6857	-29.8
167.445	-61.6859	-28.9
167.446	-61.6861	-29
167.446	-61.6863	-28.1
167.446	-61.6865	-28.4
167.447	-61.6867	-30.9
167.447	-61.6869	-31.3
167.448	-61.6871	-30.6
167.448	-61.6873	-30.2
167.449	-61.6875	-29.9
167.449	-61.6877	-29.6
167.449	-61.6879	-28.6
167.45	-61.6881	-29.1
167.45	-61.6883	-27.9
167.451	-61.6885	-28.4
167.451	-61.6886	-22.9
167.451	-61.6888	-27.5
167.452	-61.689	-22.2
167.452	-61.6892	-22.2
167.453	-61.6894	-21.5
167.453	-61.6896	-21.5
167.454	-61.6898	-21
167.454	-61.69	-20.3
167.454	-61.6902	-20.3
167.455	-61.6904	-19.7
167.455	-61.6906	-20.1
167.456	-61.6908	-18.5
167.456	-61.691	-19.4
167.457	-61.6912	-18.2
167.457	-61.6914	-18.5
167.457	-61.6916	-17.8
167.458	-61.6917	-17.8
167.458	-61.6919	-17.2
167.459	-61.6921	-17
167.459	-61.6923	-20.6
167.459	-61.6925	-20.4
167.46	-61.6927	-19.9
167.46	-61.6929	-19.5
167.461	-61.6931	-18.7
167.461	-61.6933	-18.1
167.462	-61.6935	-18.3
167.462	-61.6937	-16.9
167.462	-61.6939	-17.6
167.463	-61.6941	-11.9
167.463	-61.6943	-12.3
167.464	-61.6945	-11.3
167.464	-61.6947	-10.5
167.465	-61.6948	-11.3
167.465	-61.695	-9.4
167.465	-61.6952	-10.8
167.466	-61.6954	-8.2
167.466	-61.6956	-9.5
167.467	-61.6958	-7.6
167.467	-61.696	-8.5
167.467	-61.6962	-10.4
167.468	-61.6964	-7.3
167.468	-61.6966	-9.7
167.469	-61.6968	-9.9
167.469	-61.697	-9.4
167.47	-61.6972	-9
167.47	-61.6974	-8.3
167.47	-61.6976	-7.4
167.471	-61.6978	-8.1
167.471	-61.6979	-2.3
167.472	-61.6981	-7.3
167.472	-61.6983	-1.2
167.472	-61.6985	-1.3
167.473	-61.6987	-1
167.473	-61.6989	0
167.474	-61.6991	0.3
167.474	-61.6993	1.3
167.475	-61.6995	1.6
167.475	-61.6997	3
167.475	-61.6999	3.1
167.476	-61.7001	0
167.476	-61.7003	0.6
167.477	-61.7005	1.3
167.477	-61.7007	1.4
167.478	-61.7009	2.7
167.478	-61.701	2.8
167.478	-61.7012	8.2
167.479	-61.7014	8.2
167.479	-61.7016	9.4
167.48	-61.7018	10.1
167.48	-61.702	10.5
167.48	-61.7022	11.7
167.481	-61.7024	12
167.481	-61.7026	13.5
167.482	-61.7028	13.5
167.482	-61.703	11.4
167.483	-61.7032	10.5
167.483	-61.7034	12.7
167.483	-61.7036	12.8
167.484	-61.7038	18.3
167.484	-61.704	18.7
167.485	-61.7041	19.5
167.485	-61.7043	20.8
167.486	-61.7045	20.9
167.486	-61.7047	22.1
167.486	-61.7049	22.3
167.487	-61.7051	24
167.487	-61.7053	23.9
167.488	-61.7055	21.1
167.488	-61.7057	21.6
167.488	-61.7059	22.4
167.489	-61.7061	22.9
167.489	-61.7063	23.1
167.49	-61.7065	24.5
167.49	-61.7067	24.3
167.491	-61.7069	30.3
167.491	-61.7071	29.5
167.491	-61.7072	31.3
167.492	-61.7074	31.1
167.492	-61.7076	32.2
167.493	-61.7078	32.3
167.493	-61.708	33.1
167.494	-61.7082	34.3
167.494	-61.7084	34.3
167.494	-61.7086	31.7
167.495	-61.7088	31.9
167.495	-61.709	32.5
167.496	-61.7092	32.9
167.496	-61.7094	33.6
167.496	-61.7096	34.2
167.497	-61.7098	34.4
167.497	-61.71	34.8
167.498	-61.7101	39.5
167.498	-61.7103	39.2
167.499	-61.7105	40.7
167.499	-61.7107	39.7
167.499	-61.7109	41.6
167.5	-61.7111	41.1
167.5	-61.7113	42
167.501	-61.7115	42.1
167.501	-61.7117	42.5
167.502	-61.7119	43.3
167.502	-61.7121	43.4
167.502	-61.7123	44.3
167.503	-61.7125	44.1
167.503	-61.7127	45.1
167.504	-61.7129	41.5
167.504	-61.7131	41.9
167.504	-61.7132	42.3
167.505	-61.7134	43
167.505	-61.7136	42.9
167.506	-61.7138	43.4
167.506	-61.714	44.2
167.507	-61.7142	44
167.507	-61.7144	45.2
167.507	-61.7146	44.4
167.508	-61.7148	49.5
167.508	-61.715	49.7
167.509	-61.7152	49.7
167.509	-61.7154	50.6
167.509	-61.7156	49.8
167.51	-61.7158	51.4
167.51	-61.716	50.4
167.511	-61.7162	51.9
167.511	-61.7163	50.4
167.512	-61.7165	52.3
167.512	-61.7167	51.6
167.512	-61.7169	51.7
167.513	-61.7171	51.6
167.513	-61.7173	51.5
167.514	-61.7175	52.2
167.514	-61.7177	51
167.515	-61.7179	51.9
167.515	-61.7181	51.1
167.515	-61.7183	51.2
167.516	-61.7185	50.6
167.516	-61.7187	50.9
167.517	-61.7189	50.3
167.517	-61.7191	50.7
167.517	-61.7193	45.2
167.518	-61.7194	50.3
167.518	-61.7196	44.2
167.519	-61.7198	44.6
167.519	-61.72	43.7
167.52	-61.7202	43.4
167.52	-61.7204	42.7
167.52	-61.7206	42.2
167.521	-61.7208	45.7
167.521	-61.721	45.5
167.522	-61.7212	44.5
167.522	-61.7214	45
167.523	-61.7216	43.5
167.523	-61.7218	44.3
167.523	-61.722	43.3
167.524	-61.7222	43.6
167.524	-61.7224	43.6
167.525	-61.7225	42.9
167.525	-61.7227	43.8
167.525	-61.7229	42.8
167.526	-61.7231	43.4
167.526	-61.7233	43
167.527	-61.7235	42.5
167.527	-61.7237	44.1
167.528	-61.7239	42
167.528	-61.7241	43.8
167.528	-61.7243	42.9
167.529	-61.7245	43.4
167.529	-61.7247	43.9
167.53	-61.7249	44.1
167.53	-61.7251	44.7
167.531	-61.7253	45.3
167.531	-61.7255	45.5
167.531	-61.7256	46.4
167.532	-61.7258	46.5
167.532	-61.726	42.9
167.533	-61.7262	43.5
167.533	-61.7264	43.5
167.533	-61.7266	44.7
167.534	-61.7268	43.9
167.534	-61.727	45.3
167.535	-61.7272	45.1
167.535	-61.7274	46
167.536	-61.7276	46.3
167.536	-61.7278	51.1
167.536	-61.728	51.4
167.537	-61.7282	52.1
167.537	-61.7284	52.3
167.538	-61.7286	53.1
167.538	-61.7287	52.9
167.539	-61.7289	54.3
167.539	-61.7291	54.4
167.539	-61.7293	55.2
167.54	-61.7295	56.2
167.54	-61.7297	55.9
167.541	-61.7299	53.5
167.541	-61.7301	53.6
167.541	-61.7303	54.3
167.542	-61.7305	55.4
167.542	-61.7307	55.5
167.543	-61.7309	61.1
167.543	-61.7311	56.6
167.544	-61.7313	62.3
167.544	-61.7315	62.2
167.544	-61.7317	63.3
167.545	-61.7318	63.7
167.545	-61.732	64.2
167.546	-61.7322	64.3
167.546	-61.7324	65.1
167.546	-61.7326	65.4
167.547	-61.7328	66
167.547	-61.733	66.5
167.548	-61.7332	66.8
167.548	-61.7334	63.8
167.549	-61.7336	63.7
167.549	-61.7338	64.6
167.549	-61.734	65.2
167.55	-61.7342	65.1
167.55	-61.7344	65.9
167.551	-61.7346	65.7
167.551	-61.7348	66.7
167.552	-61.7349	66.7
167.552	-61.7351	67.2
167.552	-61.7353	72
167.553	-61.7355	72
167.553	-61.7357	72.9
167.554	-61.7359	73.2
167.554	-61.7361	73.4
167.554	-61.7363	74.2
167.555	-61.7365	74.5
167.555	-61.7367	75.6
167.556	-61.7369	74.9
167.556	-61.7371	76.5
167.557	-61.7373	76
167.557	-61.7375	77.1
167.557	-61.7377	77.3
167.558	-61.7379	76.9
167.558	-61.738	74.4
167.559	-61.7382	74.1
167.559	-61.7384	75.1
167.56	-61.7386	75.1
167.56	-61.7388	75.6
167.56	-61.739	76
167.561	-61.7392	76.6
167.561	-61.7394	76.7
167.562	-61.7396	77.4
167.562	-61.7398	77.7
167.562	-61.74	77.5
167.563	-61.7402	82.4
167.563	-61.7404	82.4
167.564	-61.7406	83.1
167.564	-61.7408	82.7
167.565	-61.741	83.8
167.565	-61.7411	82.6
167.565	-61.7413	84.8
167.566	-61.7415	83.2
167.566	-61.7417	84.9
167.567	-61.7419	84.2
167.567	-61.7421	84.5
167.568	-61.7423	84.8
167.568	-61.7425	84.5
167.568	-61.7427	85.1
167.569	-61.7429	84.9
167.569	-61.7431	84.8
167.57	-61.7433	84.7
167.57	-61.7435	85.1
167.57	-61.7437	85
167.571	-61.7439	83.9
167.571	-61.7441	85.3
167.572	-61.7442	84
167.572	-61.7444	84.6
167.573	-61.7446	84.7
167.573	-61.7448	83.7
167.573	-61.745	84.6
167.574	-61.7452	83.7
167.574	-61.7454	84
167.575	-61.7456	84.1
167.575	-61.7458	83.2
167.576	-61.746	83.9
167.576	-61.7462	83.1
167.576	-61.7464	83.3
167.577	-61.7466	83.6
167.577	-61.7468	78.5
167.578	-61.747	83.7
167.578	-61.7471	82.7
167.578	-61.7473	83.2
167.579	-61.7475	83.2
167.579	-61.7477	82.8
167.58	-61.7479	83.1
167.58	-61.7481	83.2
167.581	-61.7483	83.1
167.581	-61.7485	82.9
167.581	-61.7487	83
167.582	-61.7489	82.8
167.582	-61.7491	78.6
167.583	-61.7493	82.9
167.583	-61.7495	78.6
167.583	-61.7497	82.9
167.584	-61.7499	78.2
167.584	-61.7501	78.3
167.585	-61.7502	77.4
167.585	-61.7504	77.4
167.586	-61.7506	76.3
167.586	-61.7508	76.3
167.586	-61.751	75.3
167.587	-61.7512	75.2
167.587	-61.7514	78.4
167.588	-61.7516	77.2
167.588	-61.7518	77.9
167.589	-61.752	75.7
167.589	-61.7522	76.4
167.589	-61.7524	75.3
167.59	-61.7526	74.3
167.59	-61.7528	74.6
167.591	-61.753	68.8
167.591	-61.7532	73.3
167.591	-61.7533	67.7
167.592	-61.7535	67.6
167.592	-61.7537	66.7
167.593	-61.7539	66.2
167.593	-61.7541	65.5
167.594	-61.7543	69.2
167.594	-61.7545	68.2
167.594	-61.7547	68.1
167.595	-61.7549	67.5
167.595	-61.7551	67
167.596	-61.7553	66.6
167.596	-61.7555	65.8
167.597	-61.7557	66.3
167.597	-61.7559	65.7
167.597	-61.7561	65.7
167.598	-61.7563	65.2
167.598	-61.7564	65.5
167.599	-61.7566	65.4
167.599	-61.7568	65.9
167.599	-61.757	65.8
167.6	-61.7572	66.2
167.6	-61.7574	66.3
167.601	-61.7576	66.9
167.601	-61.7578	66.9
167.602	-61.758	68
167.602	-61.7582	68
167.602	-61.7584	68.6
167.603	-61.7586	69.1
167.603	-61.7588	65.8
167.604	-61.759	66.4
167.604	-61.7592	66.3
167.605	-61.7594	67.4
167.605	-61.7595	67.9
167.605	-61.7597	68.1
167.606	-61.7599	69.1
167.606	-61.7601	68.7
167.607	-61.7603	73.9
167.607	-61.7605	69.9
167.607	-61.7607	74.8
167.608	-61.7609	74.7
167.608	-61.7611	76.2
167.609	-61.7613	75.1
167.609	-61.7615	77
167.61	-61.7617	76.1
167.61	-61.7619	77.6
167.61	-61.7621	76.4
167.611	-61.7623	77.7
167.611	-61.7625	77.5
167.612	-61.7626	77.8
167.612	-61.7628	78.1
167.613	-61.763	78.2
167.613	-61.7632	78.6
167.613	-61.7634	78.2
167.614	-61.7636	79.3
167.614	-61.7638	78.4
167.615	-61.764	79.2
167.615	-61.7642	79.2
167.615	-61.7644	79.5
167.616	-61.7646	80.1
167.616	-61.7648	79.8
167.617	-61.765	76.9
167.617	-61.7652	79.5
167.618	-61.7654	77.7
167.618	-61.7656	76.7
167.618	-61.7657	77.5
167.619	-61.7659	77.3
167.619	-61.7661	78.1
167.62	-61.7663	77.9
167.62	-61.7665	78.7
167.62	-61.7667	78.6
167.621	-61.7669	78.6
167.621	-61.7671	79.6
167.622	-61.7673	79.4
167.622	-61.7675	80.4
167.623	-61.7677	80.4
167.623	-61.7679	85
167.623	-61.7681	85
167.624	-61.7683	86.4
167.624	-61.7685	85.7
167.625	-61.7687	87
167.625	-61.7688	87.2
167.626	-61.769	87.6
167.626	-61.7692	88.5
167.626	-61.7694	88
167.627	-61.7696	89.6
167.627	-61.7698	88.9
167.628	-61.77	90
167.628	-61.7702	89.7
167.628	-61.7704	87.2
167.629	-61.7706	90.6
167.629	-61.7708	87.8
167.63	-61.771	88.1
167.63	-61.7712	88.4
167.631	-61.7714	89.1
167.631	-61.7716	89.4
167.631	-61.7718	90.1
167.632	-61.7719	95.1
167.632	-61.7721	95.3
167.633	-61.7723	96.1
167.633	-61.7725	97.3
167.634	-61.7727	97.5
167.634	-61.7729	98.9
167.634	-61.7731	99.5
167.635	-61.7733	100.6
167.635	-61.7735	97.4
167.636	-61.7737	98.9
[truncated: 17,530 more rows]

## Sheet: Line5
Longitude	Latitude	Mag Anomaly (nT)
176.972	-65.1359	93.7
176.969	-65.1337	100.8
176.965	-65.1315	119
176.961	-65.1292	126.7
176.957	-65.127	135.6
176.953	-65.1248	136.9
176.949	-65.1226	134.6
176.945	-65.1204	118.7
176.941	-65.1182	100.4
176.937	-65.116	92
176.933	-65.1137	96.9
176.929	-65.1115	79.2
176.925	-65.1093	73.1
176.921	-65.1072	88.3
176.917	-65.1051	119
176.913	-65.103	138
176.909	-65.1009	149.3
176.905	-65.0988	198
176.901	-65.0967	209.3
176.897	-65.0946	189.6
176.892	-65.0925	165.3
176.888	-65.0904	168.8
176.884	-65.0882	162.3
176.88	-65.0861	173
176.876	-65.084	138.4
176.872	-65.0819	108.6
176.868	-65.0798	105.8
176.864	-65.0776	144.4
176.86	-65.0755	193.8
176.856	-65.0734	220.2
176.852	-65.0713	246.9
176.848	-65.0692	254
176.844	-65.067	222.8
176.84	-65.065	223.1
176.836	-65.0629	204.6
176.832	-65.0607	223.4
176.828	-65.0586	229
176.823	-65.0565	234.5
176.819	-65.0544	181.9
176.815	-65.0523	148.8
176.811	-65.0502	169.7
176.807	-65.048	189.4
176.803	-65.0459	205.4
176.799	-65.0438	232.1
176.795	-65.0416	240.5
176.791	-65.0395	231.7
176.786	-65.0373	208.1
176.782	-65.0351	221.9
176.778	-65.0329	256.2
176.77	-65.0286	215.8
176.766	-65.0265	211.4
176.762	-65.0243	212.9
176.758	-65.0222	208.2
176.754	-65.02	168
176.75	-65.0178	164.9
176.746	-65.0156	170.8
176.742	-65.0135	163.2
176.738	-65.0113	155.2
176.734	-65.0091	106.9
176.729	-65.0069	81.6
176.725	-65.0048	48.4
176.721	-65.0026	40.1
176.717	-65.0004	40.2
176.713	-64.9982	53.5
176.709	-64.9961	81.3
176.705	-64.9939	95.4
176.701	-64.9917	94.7
176.697	-64.9895	95
176.693	-64.9873	138.7
176.689	-64.9851	197
176.685	-64.9828	219.3
176.681	-64.9806	224.2
176.677	-64.9785	229.6
176.673	-64.9763	225.5
176.669	-64.9741	227.2
176.665	-64.9719	228.4
176.661	-64.9697	222.1
176.657	-64.9674	201.7
176.653	-64.9652	186.2
176.649	-64.9629	176.3
176.645	-64.9607	174.4
176.641	-64.9584	171.8
176.637	-64.9562	159.9
176.633	-64.954	140.5
176.629	-64.9517	121.4
176.625	-64.9496	87
176.621	-64.9473	51.6
176.617	-64.9451	17
176.613	-64.9429	-10.7
176.609	-64.9407	-36
176.605	-64.9385	-73.7
176.6	-64.9364	-121.8
176.596	-64.9342	-158
176.591	-64.932	-169.5
176.587	-64.9299	-180.4
176.583	-64.9277	-205.4
176.579	-64.9255	-209.7
176.574	-64.9233	-199.1
176.57	-64.9212	-187
176.566	-64.919	-166.8
176.562	-64.9169	-154.9
176.557	-64.9147	-129.7
176.553	-64.9125	-113.2
176.549	-64.9104	-96
176.545	-64.9083	-70.7
176.54	-64.9061	-56.3
176.536	-64.904	-44.9
176.532	-64.9019	-46.7
176.528	-64.8998	-79.5
176.523	-64.8977	-109.6
176.519	-64.8956	-127
176.515	-64.8934	-141.7
176.51	-64.8913	-178
176.506	-64.8892	-197.9
176.502	-64.8871	-204
176.498	-64.885	-206.9
176.493	-64.8829	-193.1
176.489	-64.8807	-177
176.485	-64.8785	-157
176.481	-64.8763	-135.8
176.477	-64.874	-111.4
176.473	-64.8718	-79.1
176.469	-64.8695	-24.2
176.465	-64.8672	34.6
176.461	-64.8649	114.6
176.458	-64.8627	151.1
176.454	-64.8604	168
176.45	-64.8581	247.9
176.446	-64.8559	258.7
176.442	-64.8536	293.8
176.438	-64.8513	307.6
176.434	-64.8491	333.4
176.43	-64.8469	339.9
176.427	-64.8447	356.5
176.423	-64.8425	341.8
176.419	-64.8403	340.6
176.415	-64.8382	330.3
176.411	-64.836	298.6
176.407	-64.8338	272
176.403	-64.8315	225.6
176.399	-64.8293	187.1
176.395	-64.8271	126.5
176.391	-64.8249	103.8
176.387	-64.8228	45.4
176.383	-64.8206	11.3
176.378	-64.8185	-10.5
176.374	-64.8163	-32.6
176.37	-64.8141	-31.7
176.366	-64.8119	-26
176.362	-64.8097	-6.8
176.358	-64.8075	16.6
176.354	-64.8053	39.1
176.35	-64.8031	65.7
176.346	-64.8009	94.1
176.341	-64.7987	112.3
176.337	-64.7965	117.4
176.333	-64.7943	113
176.329	-64.7921	103.5
176.325	-64.7899	84.1
176.321	-64.7877	59.4
176.317	-64.7854	41.3
176.313	-64.7832	24.7
176.309	-64.781	10.1
176.304	-64.7788	9.3
176.3	-64.7766	13.7
176.296	-64.7744	28.3
176.291	-64.7722	49.2
176.287	-64.77	72.7
176.283	-64.7678	104.5
176.279	-64.7656	133.9
176.275	-64.7635	165
176.27	-64.7613	193.7
176.266	-64.7591	222.1
176.262	-64.7569	239.6
176.258	-64.7547	252.1
176.254	-64.7526	264.8
176.249	-64.7504	266.8
176.245	-64.7482	259.2
176.241	-64.7461	259.4
176.237	-64.7439	253.5
176.232	-64.7417	254.2
176.228	-64.7396	256.8
176.224	-64.7374	254.5
176.22	-64.7353	252.9
176.216	-64.7332	246
176.211	-64.731	236.7
176.207	-64.7288	225.4
176.203	-64.7266	203.5
176.199	-64.7244	180.1
176.194	-64.7222	146.6
176.19	-64.72	117
176.186	-64.7177	86.3
176.182	-64.7155	44.2
176.178	-64.7132	2.7
176.174	-64.711	-40.7
176.17	-64.7088	-80.6
176.166	-64.7066	-116
176.162	-64.7043	-158.6
176.158	-64.702	-211.7
176.154	-64.6998	-247.5
176.15	-64.6976	-282.6
176.147	-64.6953	-334.1
176.143	-64.6931	-351.5
176.138	-64.6909	-367.7
176.134	-64.6886	-413.7
176.13	-64.6863	-428
176.126	-64.6841	-439.4
176.122	-64.6818	-443.7
176.118	-64.6796	-435.2
176.114	-64.6774	-462.2
176.11	-64.6751	-455.2
176.106	-64.6729	-408.5
176.102	-64.6706	-380.4
176.098	-64.6685	-387.7
176.095	-64.6664	-364.4
176.091	-64.6642	-322.7
176.086	-64.6621	-308.2
176.082	-64.6599	-298.3
176.078	-64.6578	-292.3
176.074	-64.6556	-278.1
176.07	-64.6535	-281.8
176.065	-64.6513	-279.1
176.061	-64.6491	-279.6
176.057	-64.6469	-290.6
176.053	-64.6447	-282.6
176.048	-64.6425	-289.4
176.044	-64.6403	-297
176.04	-64.6381	-298.3
176.036	-64.6359	-278.5
176.032	-64.6337	-276.4
176.027	-64.6315	-266.5
176.023	-64.6293	-237.3
176.019	-64.6271	-232.5
176.015	-64.6249	-217.4
176.011	-64.6227	-196.6
176.006	-64.6205	-193.2
176.002	-64.6183	-182.4
175.998	-64.6161	-171.9
175.994	-64.6138	-158.2
175.99	-64.6116	-139.4
175.985	-64.6094	-111.9
175.981	-64.6071	-86.5
175.977	-64.6049	-49.7
175.973	-64.6027	-17.9
175.969	-64.6005	13.6
175.965	-64.5982	44.3
175.96	-64.596	71.6
175.956	-64.5938	88.3
175.952	-64.5916	104.1
175.948	-64.5894	111.2
175.944	-64.5872	110.4
175.94	-64.585	102.8
175.936	-64.5829	82.4
175.932	-64.5807	51.4
175.927	-64.5785	5.1
175.923	-64.5763	-57.7
175.919	-64.5741	-121.3
175.915	-64.5719	-183.1
175.91	-64.5696	-238.9
175.906	-64.5674	-279.1
175.902	-64.5652	-305.2
175.898	-64.563	-318.7
175.893	-64.5608	-320.2
175.889	-64.5586	-314.5
175.885	-64.5563	-307.1
175.881	-64.554	-295.2
175.877	-64.5516	-286.7
175.873	-64.5494	-281
175.869	-64.5471	-276.6
175.865	-64.5448	-275.5
175.861	-64.5426	-285
175.857	-64.5403	-292.5
175.853	-64.538	-299.6
175.849	-64.5357	-312.4
175.845	-64.5335	-320.4
175.841	-64.5312	-333.4
175.837	-64.529	-334.9
175.833	-64.5267	-344.5
175.829	-64.5243	-347.4
175.825	-64.522	-337.8
175.821	-64.5197	-331.9
175.817	-64.5174	-327.4
175.813	-64.515	-316.1
175.809	-64.5128	-310.5
175.805	-64.5105	-299.3
175.801	-64.5081	-288
175.797	-64.5058	-275.7
175.793	-64.5035	-261.7
175.789	-64.5011	-246.3
175.78	-64.4967	-228
175.776	-64.4946	-228.8
175.771	-64.4924	-230.1
175.767	-64.4902	-233.3
175.762	-64.488	-241.1
175.758	-64.4858	-258.8
175.754	-64.4836	-259.6
175.749	-64.4814	-253.8
175.745	-64.4793	-258.8
175.741	-64.4771	-254.5
175.736	-64.4749	-229.4
175.732	-64.4727	-195.4
175.727	-64.4705	-167
175.723	-64.4684	-129
175.719	-64.4662	-81.1
175.715	-64.4639	-32.8
175.711	-64.4617	1.9
175.706	-64.4594	37.8
175.702	-64.4571	63
175.698	-64.4549	62.9
175.694	-64.4527	52.9
175.69	-64.4504	25.2
175.686	-64.4481	-11.3
175.682	-64.4458	-57.7
175.678	-64.4436	-99.3
175.674	-64.4413	-126.1
175.67	-64.4389	-149
175.666	-64.4366	-168.7
175.662	-64.4343	-177.7
175.658	-64.432	-181.8
175.654	-64.4296	-186.3
175.65	-64.4273	-185.7
175.646	-64.425	-169.9
175.641	-64.4227	-150.2
175.637	-64.4204	-126
175.633	-64.4181	-84.7
175.629	-64.4158	-42.6
175.625	-64.4135	9.5
175.621	-64.4112	57.5
175.617	-64.4089	82.4
175.613	-64.4067	110.2
175.608	-64.4044	125
175.605	-64.4021	142.2
175.601	-64.3999	150.7
175.596	-64.3975	151.4
175.592	-64.3953	146.6
175.588	-64.3929	134.1
175.584	-64.3906	122.7
175.579	-64.3884	110.8
175.575	-64.3861	104.9
175.571	-64.3838	102.9
175.567	-64.3816	101.3
175.562	-64.3793	100.5
175.558	-64.377	92.8
175.554	-64.3748	89.6
175.549	-64.3725	79.3
175.545	-64.3702	79.9
175.541	-64.3679	80.4
175.537	-64.3657	87.4
175.532	-64.3634	81.8
175.528	-64.3611	90.3
175.524	-64.3588	92.6
175.519	-64.3565	88.3
175.515	-64.3543	82.4
175.511	-64.352	83.1
175.507	-64.3497	89.3
175.502	-64.3474	100.8
175.498	-64.3452	118.6
175.494	-64.3429	143.7
175.489	-64.3406	159.7
175.485	-64.3383	175.3
175.481	-64.336	183
175.477	-64.3336	182.1
175.473	-64.3313	192
175.468	-64.3289	187.1
175.464	-64.3265	181
175.46	-64.3241	178.6
175.456	-64.3217	173.1
175.452	-64.3193	167.8
175.448	-64.3169	169.6
175.444	-64.3145	167.5
175.439	-64.3121	166.5
175.435	-64.3097	162.7
175.431	-64.3073	153.7
175.427	-64.305	151.2
175.423	-64.3026	146.8
175.419	-64.3003	138.8
175.415	-64.2979	137.1
175.41	-64.2955	146.4
175.406	-64.2931	159.6
175.402	-64.2908	172.4
175.398	-64.2884	186.6
175.394	-64.2861	201.4
175.39	-64.2837	209.5
175.386	-64.2813	217.5
175.381	-64.2789	222.7
175.377	-64.2765	199.5
175.373	-64.2741	182.9
175.369	-64.2717	159.1
175.365	-64.2693	140.3
175.361	-64.267	118.4
175.357	-64.2646	102.5
175.353	-64.2622	86.7
175.348	-64.2598	78.1
175.344	-64.2574	73.2
175.34	-64.255	76.2
175.336	-64.2527	78.7
175.332	-64.2503	87.6
175.328	-64.248	93.3
175.324	-64.2455	103.8
175.32	-64.2432	108.4
175.316	-64.2408	117.1
175.311	-64.2384	125.9
175.307	-64.2361	138.1
175.303	-64.2337	139.6
175.299	-64.2314	132.8
175.295	-64.2291	129.2
175.29	-64.2269	144.3
175.286	-64.2248	163.4
175.281	-64.2226	154.3
175.276	-64.2204	152.1
175.272	-64.2182	154.4
175.267	-64.216	169.8
175.262	-64.2139	184.8
175.258	-64.2117	198.9
175.253	-64.2095	205.2
175.248	-64.2074	209.6
175.244	-64.2052	230.3
175.239	-64.203	247
175.234	-64.2008	267.5
175.23	-64.1986	286.9
175.226	-64.1964	314.3
175.221	-64.1942	340.8
175.217	-64.192	365.2
175.213	-64.1898	382.9
175.208	-64.1876	391.9
175.204	-64.1854	395.4
175.199	-64.1832	389.6
175.195	-64.1809	395.9
175.191	-64.1787	390.4
175.186	-64.1765	375.5
175.182	-64.1741	377.9
175.178	-64.1718	379.8
175.174	-64.1695	397.9
175.17	-64.1671	420.9
175.166	-64.1647	433.2
175.162	-64.1624	459
175.158	-64.16	481.4
175.154	-64.1577	502.8
175.15	-64.1553	523.7
175.146	-64.153	530
175.142	-64.1507	530
175.138	-64.1483	513.9
175.134	-64.146	472.6
175.129	-64.1436	427.3
175.125	-64.1413	375.2
175.121	-64.139	325.2
175.117	-64.1366	277.2
175.113	-64.1343	232
175.109	-64.1319	188
175.105	-64.1296	145.9
175.101	-64.1273	112.6
175.097	-64.125	60.4
175.093	-64.1227	-3.5
175.089	-64.1204	-54.5
175.084	-64.1181	-104.5
175.08	-64.1158	-139.6
175.076	-64.1135	-162.2
175.072	-64.1111	-175.5
175.068	-64.1088	-182.9
175.064	-64.1065	-194.7
175.059	-64.1042	-204.9
175.055	-64.1019	-204.7
175.051	-64.0996	-186.4
175.047	-64.0973	-165
175.043	-64.0949	-131.2
175.038	-64.0926	-86.3
175.034	-64.0903	-29.1
175.03	-64.088	28.9
175.026	-64.0857	80.5
175.022	-64.0834	124.5
175.018	-64.0811	161.8
175.013	-64.0787	186.4
175.009	-64.0764	200.7
175.005	-64.0741	204.1
175	-64.0718	202.8
174.996	-64.0695	192.2
174.976	-64.0532	-145.7
174.971	-64.0511	-166
174.967	-64.0489	-195.3
174.962	-64.0467	-234.5
174.958	-64.0446	-281.2
174.954	-64.0424	-331.4
174.949	-64.0403	-376.6
174.945	-64.0382	-418
174.941	-64.0359	-446.7
174.937	-64.0336	-458.5
174.932	-64.0313	-455.3
174.928	-64.0289	-444
174.924	-64.0266	-429.7
174.92	-64.0242	-412.2
174.916	-64.0219	-401.6
174.912	-64.0195	-393.3
174.908	-64.0172	-393
174.904	-64.0148	-397.7
174.9	-64.0125	-398.6
174.896	-64.0102	-394.9
174.891	-64.0079	-394.3
174.887	-64.0056	-372.9
174.883	-64.0033	-340.2
174.879	-64.001	-312.9
174.875	-63.9985	-283.3
174.871	-63.9962	-277.9
174.867	-63.9938	-296.5
174.863	-63.9915	-328.9
174.859	-63.9891	-370.6
174.855	-63.9867	-412.9
174.851	-63.9843	-450.5
174.847	-63.982	-483.6
174.843	-63.9796	-511.1
174.839	-63.9772	-537
174.835	-63.9749	-556.9
174.83	-63.9726	-570.7
174.826	-63.9702	-581.6
174.822	-63.9679	-583.4
174.818	-63.9656	-571.2
174.813	-63.9634	-530.4
174.809	-63.9611	-478.9
174.805	-63.9588	-404.9
174.8	-63.9566	-311.5
174.796	-63.9543	-208
174.792	-63.952	-96.8
174.787	-63.9498	6.3
174.783	-63.9475	100.7
174.779	-63.9453	179.7
174.774	-63.943	234.9
174.77	-63.9407	274.8
174.766	-63.9385	291.2
174.761	-63.9362	272.6
174.757	-63.934	226.8
174.753	-63.9317	162.7
174.748	-63.9295	75.6
174.744	-63.9272	-25.5
174.739	-63.9249	-137.1
174.735	-63.9227	-241.4
174.73	-63.9204	-330.6
174.726	-63.9182	-401.2
174.722	-63.916	-450
174.717	-63.9138	-477
174.713	-63.9115	-484.2
174.708	-63.9093	-475.9
174.704	-63.907	-457.2
174.7	-63.9048	-431.7
174.695	-63.9026	-406.8
174.691	-63.9004	-381
174.687	-63.8981	-362.8
174.683	-63.8959	-357
174.678	-63.8936	-356
174.674	-63.8914	-358.5
174.67	-63.8891	-362.9
174.666	-63.8867	-364.8
174.662	-63.8843	-364.3
174.657	-63.882	-362.4
174.653	-63.8796	-359.6
174.649	-63.8772	-358.6
174.645	-63.8748	-352.7
174.641	-63.8724	-347.2
174.637	-63.87	-334.3
174.633	-63.8676	-325
174.629	-63.8652	-323.3
174.625	-63.8627	-323.2
174.621	-63.8603	-325.2
174.617	-63.8579	-334.4
174.613	-63.8555	-346
174.609	-63.8531	-359.1
174.605	-63.8507	-378
174.601	-63.8482	-394.6
174.597	-63.8458	-404.3
174.593	-63.8434	-410.5
174.589	-63.841	-416
174.585	-63.8386	-420.5
174.581	-63.8362	-425.9
174.577	-63.8337	-435.8
174.573	-63.8313	-448.4
174.568	-63.829	-463.5
174.564	-63.8266	-478.3
174.56	-63.8242	-493.3
174.556	-63.8218	-507.9
174.552	-63.8195	-515.8
174.548	-63.8171	-517.1
174.543	-63.8147	-506.4
174.539	-63.8123	-492.7
174.535	-63.8099	-473.9
174.531	-63.8075	-450.1
174.527	-63.8051	-419.5
174.522	-63.8028	-383.5
174.518	-63.8005	-341.4
174.514	-63.7981	-299.2
174.509	-63.7957	-259.1
174.505	-63.7934	-220.1
174.501	-63.791	-185.3
174.497	-63.7887	-154.2
174.492	-63.7863	-125.4
174.488	-63.7839	-98.2
174.484	-63.7815	-71.6
174.479	-63.7792	-48.8
174.475	-63.7768	-28.7
174.471	-63.7745	-10.4
174.467	-63.7722	7.3
174.462	-63.7699	26.5
174.458	-63.7675	47.8
174.454	-63.7652	69.3
174.449	-63.7629	91.4
174.445	-63.7605	112.9
174.441	-63.7582	135.2
174.437	-63.7559	154.9
174.432	-63.7535	170
174.428	-63.7512	175.3
174.424	-63.7488	173.4
174.42	-63.7465	156.9
174.415	-63.7441	123.3
174.411	-63.7418	77.1
174.407	-63.7394	20.2
174.402	-63.7371	-39.3
174.398	-63.7347	-92.1
174.394	-63.7324	-130.6
174.389	-63.7301	-152.2
174.385	-63.7278	-157.2
174.381	-63.7255	-150.6
174.376	-63.7232	-135.6
174.372	-63.7209	-118.8
174.368	-63.7186	-103.5
174.363	-63.7163	-92.3
174.359	-63.714	-85.4
174.354	-63.7117	-87
174.35	-63.7094	-100.5
174.345	-63.707	-127.6
174.341	-63.7047	-162.6
174.336	-63.7024	-193.2
174.332	-63.7001	-205.1
174.327	-63.6978	-194.1
174.323	-63.6954	-161.8
174.319	-63.693	-112.8
174.315	-63.6906	-57.2
174.31	-63.6882	-1.1
174.306	-63.6857	46.9
174.302	-63.6834	84.4
174.297	-63.681	111.5
174.293	-63.6785	122.3
174.289	-63.6761	126.5
174.285	-63.6737	126.2
174.281	-63.6713	124.8
174.276	-63.6688	117.4
174.272	-63.6664	103.9
174.268	-63.664	82.1
174.263	-63.6616	52.6
174.259	-63.6592	21.8
174.255	-63.6568	-10.3
174.251	-63.6544	-40.7
174.247	-63.652	-64.5
174.242	-63.6496	-84.3
174.238	-63.6472	-96.7
174.234	-63.6447	-99.4
174.23	-63.6423	-87.9
174.225	-63.6399	-62.9
174.221	-63.6374	-35.7
174.217	-63.635	-3.7
174.213	-63.6326	29.8
174.208	-63.6302	62.3
174.204	-63.6277	92.6
174.2	-63.6253	114.9
174.196	-63.6228	128.4
174.191	-63.6204	134.2
174.187	-63.618	137.4
174.183	-63.6155	131
174.179	-63.6131	123.8
174.175	-63.6107	117.7
174.17	-63.6082	111.6
174.166	-63.6058	102.5
174.162	-63.6034	88
174.157	-63.6009	68.5
174.153	-63.5985	42.6
174.149	-63.5961	19.5
174.145	-63.5936	2.5
174.14	-63.5912	-17.8
174.136	-63.5888	-43.3
174.132	-63.5864	-70.1
174.128	-63.5839	-98
174.124	-63.5816	-125.8
174.12	-63.5792	-149.2
174.115	-63.5767	-168.1
174.111	-63.5743	-176.2
174.107	-63.5719	-178.8
174.102	-63.5695	-181.6
174.098	-63.5671	-176.7
174.094	-63.5647	-167.7
174.089	-63.5623	-160.3
174.085	-63.5599	-132.6
174.081	-63.5575	-103.1
174.076	-63.5552	-78.4
174.072	-63.5527	-55.8
174.068	-63.5503	-32.4
174.063	-63.5479	-8.2
174.059	-63.5455	15.5
174.054	-63.5431	33
174.05	-63.5407	43.6
174.046	-63.5383	50.4
174.041	-63.5359	56.9
174.037	-63.5334	63
174.032	-63.531	67.5
174.028	-63.5286	76.5
174.024	-63.5262	83.6
174.019	-63.5238	88.1
174.015	-63.5214	92.9
174.01	-63.5191	93.9
174.006	-63.5167	91.8
174.002	-63.5143	87.3
173.997	-63.5119	81
173.993	-63.5095	74.1
173.989	-63.5071	65
173.984	-63.5047	55.9
173.98	-63.5023	43
173.975	-63.4999	26.9
173.971	-63.4975	9.6
173.967	-63.4951	-9.8
173.962	-63.4927	-26.5
173.958	-63.4903	-40.4
173.953	-63.488	-60.3
173.949	-63.4856	-82.9
173.945	-63.4832	-100.2
173.941	-63.4808	-109.6
173.936	-63.4784	-137.9
173.932	-63.476	-142.3
173.928	-63.4736	-149.6
173.923	-63.4712	-140.5
173.919	-63.4688	-144.2
173.915	-63.4664	-137.4
173.91	-63.464	-142.6
173.906	-63.4616	-136.3
173.902	-63.4592	-125.6
173.897	-63.4568	-116.7
173.893	-63.4544	-110.8
173.889	-63.452	-98.3
173.885	-63.4496	-87.2
173.88	-63.4472	-74.7
173.876	-63.4448	-61.3
173.872	-63.4424	-35.6
173.867	-63.44	-13.7
173.863	-63.4376	0.6
173.859	-63.4352	9.6
173.854	-63.4328	27.4
173.85	-63.4304	35.4
173.846	-63.428	50.5
173.841	-63.4255	60
173.837	-63.4231	62.8
173.833	-63.4208	62.5
173.829	-63.4184	63.3
173.824	-63.416	56.6
173.82	-63.4136	52.6
173.816	-63.4112	55.8
173.812	-63.4088	63.4
173.807	-63.4064	63.4
173.803	-63.404	62.7
173.799	-63.4016	62.1
173.794	-63.3993	58.2
173.79	-63.3969	53.9
173.781	-63.3921	46.8
173.777	-63.3897	42.3
173.772	-63.3873	28.6
173.768	-63.3849	11
173.764	-63.3825	-5.6
173.759	-63.3801	-20.4
173.755	-63.3777	-30.7
173.751	-63.3754	-40.3
173.747	-63.373	-43.7
173.742	-63.3706	-42.7
173.738	-63.3682	-39.7
173.733	-63.3658	-36.8
173.729	-63.3634	-39.9
173.725	-63.361	-42.4
173.72	-63.3586	-42.9
173.716	-63.3562	-47
173.712	-63.3538	-47
173.708	-63.3514	-44.7
173.703	-63.3489	-45.8
173.699	-63.3465	-44.5
173.695	-63.3441	-40.4
173.691	-63.3416	-32
173.686	-63.3392	-20.3
173.682	-63.3368	-6.9
173.678	-63.3344	3.6
173.673	-63.332	13.7
173.669	-63.3296	23.8
173.665	-63.3272	32.7
173.661	-63.3248	40.7
173.657	-63.3224	47.2
173.652	-63.32	49.8
173.648	-63.3176	50.2
173.644	-63.3151	50.9
173.64	-63.3127	52.8
173.636	-63.3103	56
173.632	-63.3079	58.1
173.628	-63.3055	60.5
173.623	-63.3031	64.7
173.619	-63.3006	68.6
173.615	-63.2982	72.9
173.611	-63.2958	76.2
173.607	-63.2935	79.6
173.603	-63.2911	82
173.599	-63.2887	83.8
173.595	-63.2863	83.3
173.591	-63.2839	81.3
173.587	-63.2815	78.3
173.583	-63.2791	75.9
173.579	-63.2767	74.4
173.575	-63.2744	74.3
173.571	-63.272	76.7
173.567	-63.2696	81.1
173.562	-63.2673	85.2
173.558	-63.2649	87.1
173.554	-63.2626	88.6
173.55	-63.2602	90.3
173.546	-63.2579	93.7
173.542	-63.2555	96.7
173.537	-63.2532	98.8
173.533	-63.2509	99.1
173.529	-63.2486	98
173.525	-63.2463	95.6
173.52	-63.244	91.9
173.516	-63.2417	87.4
173.512	-63.2394	84.2
173.508	-63.2372	82.6
173.504	-63.2349	78.8
173.5	-63.2326	75
173.496	-63.2303	73.3
173.491	-63.228	72.1
173.487	-63.2257	73.2
173.483	-63.2234	76.9
173.479	-63.2211	81
173.475	-63.2188	83.6
173.471	-63.2165	86.2
173.467	-63.2141	88.5
173.463	-63.2118	91
173.458	-63.2095	96
173.454	-63.2072	101.5
173.45	-63.2049	104.1
173.446	-63.2026	105.7
173.442	-63.2003	106.3
173.438	-63.1979	106.4
173.434	-63.1956	107.2
173.431	-63.1933	108.8
173.427	-63.1909	108.7
173.423	-63.1886	108.1
173.419	-63.1863	108.6
173.415	-63.184	108.8
173.411	-63.1817	108.2
173.407	-63.1794	107.4
173.404	-63.1771	104.9
173.4	-63.1748	103.2
173.396	-63.1725	102
173.392	-63.1701	100.3
173.388	-63.1678	99.2
173.385	-63.1655	97.9
173.381	-63.1632	97.1
173.377	-63.161	92.9
173.373	-63.1588	88.1
173.369	-63.1566	83.4
173.365	-63.1545	79.5
173.361	-63.1523	73.8
173.357	-63.1501	69.9
173.353	-63.1479	65.9
173.349	-63.1457	60.5
173.345	-63.1435	54.3
173.341	-63.1413	48.2
173.337	-63.1391	41.1
173.333	-63.1368	36.8
173.329	-63.1346	33.9
173.326	-63.1324	32.2
173.322	-63.1303	30.3
173.318	-63.1281	31.1
173.314	-63.1258	31.9
173.31	-63.1236	31.3
173.307	-63.1213	31.8
173.303	-63.119	29.6
173.299	-63.1167	28.2
173.295	-63.1145	25.3
173.291	-63.1122	22.8
173.287	-63.1101	20.4
173.283	-63.1079	20.3
173.279	-63.1056	21.7
173.275	-63.1034	23.2
173.271	-63.1012	23.6
173.267	-63.099	25
173.263	-63.0968	25.7
173.259	-63.0946	25.7
173.255	-63.0924	24.8
173.251	-63.0902	23.5
173.247	-63.088	22.6
173.243	-63.0858	23.6
173.239	-63.0836	25.4
173.235	-63.0813	25.8
173.231	-63.0791	26.4
173.227	-63.077	28.9
173.223	-63.0748	30.9
173.219	-63.0726	33.1
173.215	-63.0705	33.1
173.211	-63.0683	34.1
173.207	-63.0661	35.3
173.203	-63.064	35.7
173.199	-63.0618	36.5
173.195	-63.0596	37.7
173.191	-63.0574	38.7
173.187	-63.0553	41.2
173.184	-63.0531	43.1
173.18	-63.0509	42.6
173.176	-63.0487	44.7
173.172	-63.0465	44.4
173.168	-63.0444	45.9
173.164	-63.0422	45.7
173.16	-63.04	46.2
173.157	-63.0378	46.2
173.153	-63.0356	47.1
173.149	-63.0334	45.5
173.145	-63.0312	43.8
173.141	-63.029	43.2
173.137	-63.0268	40.1
173.133	-63.0246	38.1
173.129	-63.0224	34.9
173.126	-63.0202	32.9
173.122	-63.018	29.9
173.118	-63.0158	25.6
173.114	-63.0136	22.3
173.11	-63.0114	21.1
173.106	-63.0092	19.2
173.102	-63.0071	16.9
173.099	-63.0049	14.6
173.095	-63.0027	11.4
173.091	-63.0005	10
173.087	-62.9983	9.6
173.083	-62.9961	8.6
173.079	-62.9939	8.9
173.076	-62.9918	8.7
173.072	-62.9896	8.3
173.068	-62.9874	9.7
173.064	-62.9852	10.2
173.06	-62.983	12.8
173.057	-62.9808	16.5
173.053	-62.9786	18.1
173.049	-62.9764	19.7
173.046	-62.9742	22.7
173.042	-62.9721	24.7
173.038	-62.9699	27.9
173.034	-62.9678	29.6
173.03	-62.9656	31.1
173.026	-62.9635	34.3
173.022	-62.9613	36.7
173.018	-62.9592	40.6
173.014	-62.957	40.2
173.01	-62.9548	36
173.006	-62.9526	36.3
173.002	-62.9504	35.4
172.998	-62.9482	34.9
172.994	-62.9461	34.1
172.99	-62.9439	33.3
172.986	-62.9417	33.6
172.982	-62.9396	33.1
172.978	-62.9375	34.7
172.974	-62.9354	36
172.97	-62.9333	39.1
172.966	-62.9311	42.5
172.962	-62.929	46.5
172.958	-62.9268	52.6
172.954	-62.9247	56.6
172.95	-62.9225	61.8
172.945	-62.9204	66.9
172.941	-62.9182	73.9
172.937	-62.9161	80
172.933	-62.9139	88.7
172.93	-62.9116	95
172.926	-62.9094	102.8
172.922	-62.9072	109.6
172.918	-62.9049	117.2
172.914	-62.9027	126
172.91	-62.9005	133.3
172.906	-62.8983	143.7
172.902	-62.896	153
172.898	-62.8937	158.2
172.894	-62.8915	163.8
172.89	-62.8892	168.3
172.886	-62.887	165.3
172.882	-62.8848	168.9
172.878	-62.8825	167.7
172.874	-62.8803	171.1
172.87	-62.878	176.7
172.866	-62.8758	183.2
172.862	-62.8735	187.1
172.858	-62.8712	191.6
172.854	-62.8689	196.2
172.85	-62.8667	199.4
172.846	-62.8644	203.9
172.842	-62.8621	208.8
172.838	-62.8599	210.6
172.834	-62.8576	215.5
172.83	-62.8553	219.5
172.826	-62.8529	221.9
172.822	-62.8506	223.2
172.818	-62.8483	225.3
172.814	-62.846	229
172.81	-62.8437	222.4
172.806	-62.8414	211.2
172.802	-62.8391	214.8
172.798	-62.8368	205.4
172.795	-62.8345	192.5
172.791	-62.8323	186.8
172.787	-62.83	188.1
172.783	-62.8277	194.6
172.779	-62.8254	201.4
172.775	-62.8232	205.6
172.771	-62.821	209.6
172.767	-62.8187	216.9
172.764	-62.8165	232.2
172.76	-62.8143	246.5
172.756	-62.812	257.1
172.752	-62.8098	252.8
172.748	-62.8075	246.5
172.744	-62.8053	236.7
172.74	-62.8031	232.3
172.737	-62.8009	226.2
172.733	-62.7987	230.3
172.729	-62.7965	240.4
172.725	-62.7942	241.1
172.722	-62.792	231
172.718	-62.7898	228.8
172.714	-62.7876	227.2
172.711	-62.7854	217.8
172.707	-62.7832	209.5
172.703	-62.781	189.6
172.699	-62.7787	174.5
172.696	-62.7765	158.4
172.692	-62.7743	144.3
172.688	-62.7721	137.6
172.684	-62.7698	131
172.681	-62.7676	127.7
172.677	-62.7654	122
172.673	-62.7632	134.2
172.669	-62.761	147.2
172.666	-62.7588	162.2

## Sheet: G50556
Gasperini, L., et al., 2023, Late Miocene to recent tectonic evolution of the Macquarie Triple Junction: Geology, https://doi.org/10.1130/G50556.1
